# Supplementary material for: Interaction of early environment, gender and genes of monoamine neurotransmission in the aetiology of depression in a large population-based Finnish birth cohort
Source: PubMed Central journal article supplement — BMJ Open. 2011 Aug 27;1(1):e000087. doi: 10.1136/bmjopen-2011-000087 (PMC3191433; doi:10.1136/bmjopen-2011-000087), 2011-08-27
Supplement: bmjopen-2011-000087.draft_revisions.pdf [file bmjopen-2011-000087.draft_revisions.pdf]

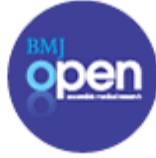

**Interaction of Early Environment, Gender and Genes of Monoamine Neurotransmission in the Etiology of Depression in a Large Population-Based Finnish Birth Cohort**

|                       |                     |
|-----------------------|---------------------|
| Journal:              | <i>BMJ Open</i>     |
| Manuscript ID:        | bmjopen-2011-000087 |
| Article Type:         | Research            |
| Date Submitted by the | 31-Jan-2011         |

review only

|                           |                                                                                                                                                                                                                                                                                                                                                                                                                                                                                                                                                                                                                                                                                                                                                                                                                                                                                                                                                                                                                                                                                                                                                                                                                                                                                                                                                                                                                                                                                                                                                                                                                                                                                                                                                                                                                                                                                                     |
|---------------------------|-----------------------------------------------------------------------------------------------------------------------------------------------------------------------------------------------------------------------------------------------------------------------------------------------------------------------------------------------------------------------------------------------------------------------------------------------------------------------------------------------------------------------------------------------------------------------------------------------------------------------------------------------------------------------------------------------------------------------------------------------------------------------------------------------------------------------------------------------------------------------------------------------------------------------------------------------------------------------------------------------------------------------------------------------------------------------------------------------------------------------------------------------------------------------------------------------------------------------------------------------------------------------------------------------------------------------------------------------------------------------------------------------------------------------------------------------------------------------------------------------------------------------------------------------------------------------------------------------------------------------------------------------------------------------------------------------------------------------------------------------------------------------------------------------------------------------------------------------------------------------------------------------------|
| Complete List of Authors: | <p>Nyman, Emma; Institute for Molecular Medicine Finland FIMM, University of Helsinki and National Institute for Health and Welfare, Public Health Genomics Unit</p> <p>Sulkava, Sonja; Institute for Molecular Medicine Finland FIMM, University of Helsinki and National Institute for Health and Welfare, Public Health Genomics Unit; Helsinki University Central Hospital, Department of Psychiatry</p> <p>Soronen, Pia; Institute for Molecular Medicine Finland FIMM, University of Helsinki and National Institute for Health and Welfare, Public Health Genomics Unit</p> <p>Miettunen, Jouko; Department of Psychiatry, University of Oulu and Oulu University Hospital, Oulu; Academy of Finland</p> <p>Loukola, Anu; Institute for Molecular Medicine Finland FIMM, University of Helsinki and National Institute for Health and Welfare, Public Health Genomics Unit</p> <p>Leppä, Virpi; University of Helsinki, Institute for Molecular Medicine Finland (FIMM); University of Helsinki, Helsinki Biomedical Graduate School</p> <p>Joukamaa, Matti; University of Tampere, Tampere School of Public Health</p> <p>Mäki, Pirjo; University of Oulu and Oulu University Hospital, Department of Psychiatry</p> <p>Järvelin, Marjo-Riitta; Institute of Health Sciences, University of Oulu</p> <p>Freimer, Nelson; University of California, Los Angeles, Semel Institute for Neuroscience and Human Behavior</p> <p>Peltonen, Leena; Institute for Molecular Medicine Finland FIMM, University of Helsinki and National Institute for Health and Welfare, Public Health Genomics Unit</p> <p>Veijola, Juha; University of Oulu and Oulu University Hospital, Department of Psychiatry; Academy of Finland</p> <p>Paunio, Tiina; Institute for Molecular Medicine Finland FIMM, University of Helsinki and National Institute for Health and Welfare, Public Health Genomics Unit</p> |
| <b>Subject Heading</b>:   | Genetics                                                                                                                                                                                                                                                                                                                                                                                                                                                                                                                                                                                                                                                                                                                                                                                                                                                                                                                                                                                                                                                                                                                                                                                                                                                                                                                                                                                                                                                                                                                                                                                                                                                                                                                                                                                                                                                                                            |
| Keywords:                 | PSYCHIATRY, Depression & mood disorders < PSYCHIATRY, GENETICS                                                                                                                                                                                                                                                                                                                                                                                                                                                                                                                                                                                                                                                                                                                                                                                                                                                                                                                                                                                                                                                                                                                                                                                                                                                                                                                                                                                                                                                                                                                                                                                                                                                                                                                                                                                                                                      |

SCHOLARONE™  
Manuscripts

only

# Interaction of Early Environment, Gender and Genes of Monoamine Neurotransmission in the Etiology of Depression in a Large Population-Based Finnish Birth Cohort

Emma S. Nyman, M.Sc.,<sup>1,2</sup> Sonja Sulkava,<sup>1,3</sup> Pia Soronen, M.Sc.,<sup>1</sup>  
Jouko Miettunen, Ph.D.,<sup>4,5</sup> Anu Loukola, Ph.D.,<sup>1</sup> Virpi Leppä, M.Sc.,<sup>1,2</sup>  
Matti Joukamaa, M.D., Ph.D.,<sup>6,7</sup> Pirjo Mäki, M.D., Ph.D.,<sup>4</sup> Marjo-Riitta  
Järvelin, M.D., Ph.D.,<sup>8,9,10</sup> Nelson Freimer, M.D.,<sup>11</sup> Leena Peltonen,  
M.D., Ph.D.<sup>1,2,12,13</sup> Juha Veijola, MD, Ph.D.,<sup>4,5</sup> Tiina Paunio M.D.,  
Ph.D.,<sup>1,3 \*</sup>

<sup>1</sup> Public Health Genomics Unit, Institute for Molecular Medicine Finland FIMM, University of Helsinki and National Institute for Health and Welfare, Helsinki, Finland

<sup>2</sup> Department of Medical Genetics, University of Helsinki, Helsinki, Finland

<sup>3</sup> Department of Psychiatry, Helsinki University Central Hospital, Helsinki, Finland

<sup>4</sup> Department of Psychiatry, University of Oulu and Oulu University Hospital, Oulu, Finland

<sup>5</sup> Academy of Finland, Helsinki, Finland

1  
2  
3 <sup>6</sup> Tampere School of Public Health, University of Tampere, Tampere, Finland

4  
5  
6 <sup>7</sup> Department of Psychiatry, Tampere University Hospital, Tampere, Finland

7  
8 <sup>8</sup> Institute of Health Sciences, University of Oulu, Oulu, Finland

9  
10 <sup>9</sup> Department of Epidemiology and Public Health, Imperial College, London, UK

11  
12  
13 <sup>10</sup> Department of Child and Adolescent Health, National Public Health Institute,  
14 Helsinki, Finland

15  
16  
17 <sup>11</sup> Semel Institute for Neuroscience and Human Behavior, University of California,  
18 Los Angeles, CA, USA

19  
20  
21  
22 <sup>12</sup> Program in Medical and Population Genetics, The Broad Institute of MIT and  
23 Harvard, Cambridge, MA, USA

24  
25  
26  
27 <sup>13</sup> Wellcome Trust Sanger Institute, Cambridge, UK

28  
29  
30  
31  
32 \* Correspondence and reprint requests: Dr. Tiina Paunio, Institute for Molecular  
33 Medicine Finland FIMM, University of Helsinki and National Institute for Health  
34 and Welfare, P.O.Box 212, FI-00251 Helsinki, Finland. Tel: +358 (0)50 350 7936,  
35 and Welfare, P.O.Box 212, FI-00251 Helsinki, Finland. Tel: +358 (0)50 350 7936,  
36 Fax: +358 (0)20 610 8480 Helsinki, Email: tiina.paunio@thl.fi.  
37  
38  
39  
40  
41  
42

43  
44 Key words: Environment, Monoamine, Gene, Depression, Cohort Study

45  
46  
47  
48 Word count text: 4018

49  
50  
51 Word count abstract: 225

## ABSTRACT

**Objectives** Depression is a worldwide leading cause of morbidity and disability. Genetic studies have recently begun to elucidate its molecular etiology. We investigated candidate genes of monoamine neurotransmission and early environmental risk factors for depressiveness in the genetically isolated population-based Northern Finland Birth Cohort 1966 (12058 live births).

**Design** We ascertained and subdivided the study sample (n=5225) based on early developmental and social risk environments and examined candidate genes of monoamine neurotransmission, many of which have shown prior evidence of gene-environment interaction (GxE) for affective disorders, namely *SLC6A4*, *TPH2*, *COMT*, *MAOA*, and the dopamine receptor genes *DRD1-DRD5*.

**Results and Conclusion** Four variants (three in *COMT* and one in *DRD3*) interacted with high early developmental risk environment, the strongest evidence being for rs2239393 in *COMT* ( $P=0.005$ ) that showed evidence of association in the high risk group ( $P=0.008$  and  $\beta=0.044$ ;  $P=0.0053$  and  $\beta=0.083$  for rs5993883-rs2239393-rs4680 risk haplotype CGG including Val158 in high risk males). Only one variant, rs4274224 from *DRD2*, interacted with gender showing significant association in males ( $P=0.0006$  and  $\beta=0.0023$ ;  $P=0.00005$  and  $\beta=0.069$  for rs4648318-rs4274224 haplotype GG). Our results support the role of genes of monoamine neurotransmission in the etiology of depression, particularly in males, and interaction of the early developmental risk environment with a high risk haplotype of *COMT* including Val158. The results also imply

1  
2  
3 gender-specific mechanisms of mood regulation and responses to environmental  
4  
5 effectors.  
6  
7  
8  
9  
10

## 11 **ARTICLE SUMMARY**

### 14 **Article focus**

- 17 - Gene-environment and gene-gender interaction in the etiology of  
18 depression  
19
- 20 - Effect of early neurodevelopmental and social risk environments on  
21 depression  
22
- 23 - Impact on depression of monoaminergic candidate genes with prior  
24 evidence of gene-environment interaction for affective disorders, and the  
25 dopamine receptor genes  
26  
27  
28  
29  
30  
31  
32  
33  
34

### 35 **Key messages**

- 36 - Genes of monoamine neurotransmission play a role in the etiology of  
37 depression, especially in males  
38
- 39 - Early developmental risk environment interacts with a *COMT* high risk  
40 haplotype including Val158  
41  
42
- 43 - Gender-specific mechanisms of mood regulation and responses to  
44 environmental effectors are evident  
45  
46  
47  
48  
49  
50  
51

52 **Strengths and limitations of this study** Limitations of this study include that  
53 depression as defined does not necessary imply clinical diagnosis of major  
54 depression, but instead was defined based on self-report or on the score from  
55  
56  
57  
58  
59  
60

1  
2  
3 the HSCL measure, which has its limitations. Nevertheless, the prevalence of  
4 depressed mood was in the same range as in earlier reports. Furthermore, there  
5 was a notable drop-out rate among the original material of all cohort members,  
6 and about half of the original cohort members did not participate in this study.  
7  
8 Advantages of this study include the availability of longitudinal follow-up data  
9 starting antenatally, enabling inclusion of the environmental dimension without  
10 risk of recall bias. Another advantage is the unique genetic structure of the study  
11 cohort, characterized by isolation, founder effect, multiple bottlenecks and more  
12 genetic homogeneity compared to many other isolates, permitting identification of  
13 genetic risk loci that may be missed when using more heterogeneous  
14 populations. Furthermore, the subjects were representative, with all cohort  
15 members born in the same year and within a geographically defined area. Also,  
16 the size of the study sample is sufficient for identifying genetic variants of  
17 moderate impact. Both genders are also represented in almost equal amounts,  
18 which is notable since gender differences are evident in both depression and  
19 temperament traits, such as Harm avoidance. It is also beneficial that the sample  
20 is a one-year birth cohort, as it is well established that some psychiatric  
21 traits, such as Harm avoidance are age-dependent. The genetic effects may  
22 therefore be isolated from the effects of aging. Furthermore, a complete  
23 coverage of the major candidate genes that are relevant with the present focus is  
24 provided.  
25  
26  
27  
28  
29  
30  
31  
32  
33  
34  
35  
36  
37  
38  
39  
40  
41  
42  
43  
44  
45  
46  
47  
48  
49  
50  
51  
52  
53  
54  
55  
56  
57  
58  
59  
60

## INTRODUCTION

Depression is a major cause of morbidity worldwide, major depression affecting 5-7% of the population annually and 16% over the lifetime.[1] Although a genetic component in the etiology of major depression is evident with a 40-50% heritability,[2] the predisposing genetic background has so far remained largely undefined, and recent findings from genome-wide association studies also point to a complex underlying architecture.[3] Depressed patients frequently exhibit comorbidities such as anxiety and alcohol abuse,[4] and certain personality types[5-7] have been associated with depression proneness.

Environmental risk factors, in particular stressors influencing during development,[8] are considered to have a significant impact on the development and course of depression. It is likely that many of the genetic risk factors for depression interact with the early developmental environment, but recapture of these interactions has remained a challenge for etiological studies of depression. Although the interplay between genes and environment has been investigated with respect to several psychiatric disorders[9] including depression, this vast subject remains still to a large extent unexplored. On the other hand, addressing the effects of genes and environment on psychiatric morbidity enables us to examine the two main constituents in their etiology. Therefore, we wanted to include the environmental dimension in our study in order to also explore gene-environment interactions (GxE).



1  
2  
3  
4  
5  
6  
7 According to the monoamine hypothesis, depression is caused by underactivity  
8  
9 in brain monoamines, such as dopamine, serotonin, and norepinephrine.[10]  
10  
11 Recent results of neuroimaging studies have provided further support for this  
12  
13 theory.[11] The most solid evidence from candidate gene studies has perhaps  
14  
15 been obtained for the interaction of serotonin transporter and stressful life  
16  
17 events,[12] although a recent meta-analysis objects those findings.[13] Other  
18  
19 robust genetic findings have been obtained on the *COMT* gene for catechol-O-  
20  
21 methyltransferase, an enzyme catabolising catecholamines such as dopamine  
22  
23 and noradrenaline, that has been implicated f.ex. in cognition,[14] and on  
24  
25 monoamine oxidase A, an enzyme oxidizing neurotransmitter and dietary  
26  
27 monoamines such as serotonin, noradrenaline and dopamine, in which a  
28  
29 mutation for an early stop codon was found to segregate in a family with  
30  
31 antisocial behaviour,[15] and the gene was later related to antisocial behaviour  
32  
33 after maltreatment in childhood.[16]  
34  
35  
36  
37  
38  
39  
40  
41  
42  
43

44  
45 To advance our understanding of the etiology of depression, we aimed to  
46  
47 investigate candidate genes of monoamine neurotransmission and their  
48  
49 interaction with early developmental and social risk factors for depression in a  
50  
51 sample of 5225 individuals from a large Finnish isolated population cohort. As  
52  
53 gender is an important confounder for depression and at least some of the  
54  
55  
56  
57  
58  
59  
60

1  
2  
3 genetic liability is gender-specific,[2] we also examined gene-gender interactions  
4  
5  
6 in this sample.  
7  
8  
9

## 10 11 12 **METHODS**

### 13 14 15 16 17 **Setting**

18  
19  
20  
21  
22 We utilized the genetically isolated Northern Finland Birth Cohort (NFBC 1966) to  
23  
24 investigate effects of candidate genes and environmental risk factors during  
25  
26 development on depressiveness. We subdivided the study sample based on  
27  
28 developmental risk factors arising from the fetal growth environment and  
29  
30 neurological development during the first year of life (early developmental risk  
31  
32 environment) as well as from the family environment during pregnancy and early  
33  
34 childhood (social risk environment). We examined interactions of these  
35  
36 environments with candidate genes of the monoamine neurotransmitter systems,  
37  
38 many of which have prior evidence of gene-environment interaction on affective  
39  
40 disorders, namely *SLC6A4*, *TPH2*, *COMT*, *MAOA*, and the dopamine receptor  
41  
42 genes *DRD1-DRD5*.  
43  
44  
45  
46  
47  
48  
49

### 50 51 **Study subjects**

52  
53  
54  
55  
56  
57  
58  
59  
60

1  
2  
3 The Northern Finland Birth Cohort 1966 (NFBC 1966) is a longitudinal one-year  
4 birth cohort from an unselected population (N=12058 live births) comprising  
5 inhabitants of the two northernmost provinces of Finland.[17] Data collection has  
6 started from the antenatal period, and follow-up studies have been performed at  
7 the ages of 1, 14 and 31 years. The cohort study has been approved by the  
8 Ethical Committee of Oulu University Faculty of Medicine, and written informed  
9 consent has been obtained from all participants.  
10  
11  
12  
13  
14  
15  
16  
17  
18  
19  
20  
21

22  
23 In 1997 in the 31-year follow-up study[18] all cohort members alive with a known  
24 address (N=11540) were sent a postal questionnaire surveying lifestyle, social  
25 status and health (76% participated), including the Hopkins Symptom Check  
26 List-25 (HSCL).[19] and items on self-reported lifetime depression diagnosis  
27 (“Has your doctor ever diagnosed a depressive disorder?”). Additionally, cohort  
28 members who lived in Northern Finland or in the capital area (N=8465) were  
29 invited to a clinical examination (71% participated) with another questionnaire to  
30 be filled in later and sent to the research group (61% participated).[20] It  
31 included, among others, a validated Finnish translation of Cloninger’s  
32 Temperament and Character Inventory (TCI) questionnaire.[21]  
33  
34  
35  
36  
37  
38  
39  
40  
41  
42  
43  
44  
45  
46  
47  
48

49 Current depressive symptoms were assessed by the HSCL-questionnaire,[22] a  
50 25-item shortened version of an originally 90-item questionnaire. HSCL contains  
51 13-item depression and 10-item anxiety subscales assessing presence and  
52 intensity of depressive and anxiety symptoms during the previous week. Answers  
53  
54  
55  
56  
57  
58  
59  
60

1  
2  
3 are scored on a scale from 1 (not bothered) to 4 (extremely bothered). HSCL  
4  
5 total score is the sum of items divided by the number of items answered. We  
6  
7  
8 used mainly HSCL total score as symptoms of depression and anxiety are known  
9  
10 to overlap significantly. In post hoc analyses in order to better understand the  
11  
12 original association signals, the separate HSCL subscales for depressive and  
13  
14 anxiety symptoms were also taken into consideration. In addition to current  
15  
16 depressive symptoms (HSCL score) and lifetime (diagnosed) depression, we  
17  
18 used the TCI temperament trait Harm avoidance[5-7] and its subcomponents as  
19  
20 a measure of proneness to depression.  
21  
22  
23  
24  
25  
26

27 The subjects (n=5225; 2509 males, 2716 females; 45 % of the 31 year follow up  
28  
29 study sample or 43% of the original study sample) were divided into high and low  
30  
31 risk groups based on early neurodevelopmental and social risk environments  
32  
33 (Table 1). *The early developmental risk environment* was defined by 1) low birth  
34  
35 weight (<2500 g),[17] considered to reflect suboptimal growth environment during  
36  
37 fetal life and to increase risk for somatic and psychiatric diseases such as  
38  
39 depression in adulthood,[23] 2) late motor development as reflected by first  
40  
41 standing later than at the age of 10 months,[24] and 3) late development of  
42  
43 speech, defined by no words at the age of one year.[24] If two out of these risk  
44  
45 indicators were present, one was classified as having experienced a high risk  
46  
47 environment for early brain development. *The social risk environment* was  
48  
49 defined by the occurrence of two or more of the following five indicators for high  
50  
51 risk social environment during pregnancy and early childhood: 1) unwantedness  
52  
53  
54  
55  
56  
57  
58  
59  
60

1  
2  
3 of pregnancy (rated by mothers of the cohort members at the sixth or seventh  
4 month of pregnancy),[25] 2) low socio-economic status, linked with depression in  
5 the offspring in earlier studies,[26] as defined by father's social class at birth (no  
6 occupation, unskilled worker, or farmer with area under cultivation under 8  
7 hectares), 3) single parenthood at birth, 4) low level of education of mother (less  
8 than nine years of primary school), and 5) low level of information retrieval by the  
9 mother related to pregnancy and child care. There was no significant drop-out in  
10 either high risk groups as 43% and 41% of the individuals with high risk early  
11 developmental and social environments, and 47% and 46% of those with the  
12 respective low risk environments, were available for study.  
13  
14  
15  
16  
17  
18  
19  
20  
21  
22  
23  
24  
25  
26  
27  
28  
29  
30  
31  
32  
33

[Insert Table 1]

### 34 **Genotyping methods**

35  
36  
37  
38 We investigated genes relevant within the context of the monoamine hypothesis  
39 of depression: *SLC6A4*, *TPH2*, *COMT*, *MAOA*, and the dopamine receptor genes  
40 *DRD1-DRD5* (Table 2). The genotyping was performed at the Broad Institute  
41 (Cambridge, MA, USA) on the HumanCNV370-duo chip (Illumina, San Diego, CA  
42 USA) platform according to the manufacturer's instructions. The SNPs analysed  
43 included HapMap tag SNPs (<http://www.hapmap.org/index.html.en>) and were  
44 relatively evenly spaced to cover the genes and flanking regions.  
45  
46  
47  
48  
49  
50  
51  
52  
53  
54  
55  
56  
57  
58  
59  
60

1  
2  
3 [Insert Table 2]  
4  
5  
6  
7

## 8 **Statistical analysis**

9  
10  
11  
12 LD structures were determined using HAPLOVIEW. Interaction analysis and  
13 linear and logistic regression with permutation was performed using PLINK  
14 Software Package Version 1.04, in a step-wise manner to maximize our ability to  
15 detect associations and to minimize multiple testing. (i) Primarily analyses were  
16 performed to identify genetic risk variants for current depressive symptoms  
17 (HSCL score) interacting with early developmental risk ( $G \times E_{Dev}$ ) and social risk  
18 ( $G \times E_{Soc}$ ) environments. For variants giving significant evidence of interaction, we  
19 also performed analyses separately in subgroups of high and low risk,  
20 respectively. As gender is an important confounder for depression and at least  
21 some of the genetic liability is gender-specific,[2] we also examined gene-gender  
22 interactions ( $G \times Sex$ ). For variants showing significant evidence of gene-gender  
23 interaction, we also performed analyses separately in males and females. In  
24 order to form a complete view of the effects of the examined genes on  
25 depressive symptoms in the cohort, we also examined their influence on the  
26 HSCL score gender-adjusted in the complete sample regardless of  
27 environmental effectors. Finally, we tested for gene-environment correlations  
28 ( $r_{GE_{Dev}}$  and  $r_{GSoc}$ ) and associations of the risk environments with the HSCL  
29 score. (ii) Haplotype analyses were performed when two SNPs located at close  
30 vicinity physically had given association signals of  $P < 0.05$  when analyzed  
31  
32  
33  
34  
35  
36  
37  
38  
39  
40  
41  
42  
43  
44  
45  
46  
47  
48  
49  
50  
51  
52  
53  
54  
55  
56  
57  
58  
59  
60

1  
2  
3 separately. (iii) Genetic variants and haplotypes identified in the previous  
4 analyses were analyzed post hoc with respect to HSCL subscales (depressive  
5 and anxiety symptoms), depression diagnosis and TCI temperament Harm  
6 avoidance. We report point-wise empirical p-values generated by PLINK's  
7 max(T) permutation throughout the manuscript, and explicitly state where  
8 corrected empirical p-values are reported. SNPs with Hardy-Weinberg  
9 Equilibrium p-values  $<0.05$  were excluded from all analyses.  
10  
11  
12  
13  
14  
15  
16  
17  
18  
19  
20  
21  
22  
23

## 24 **RESULTS**

### 25 **Gene-environment and gene-gender interaction and association analyses** 26 **on HSCL score** 27 28 29 30 31 32

33  
34  
35 We examined the effects of nine candidate genes of monomine  
36 neurotransmission on current depressive symptoms (HSCL score) in a  
37 longitudinal population-based NFBC 1966 cohort. In particular, we searched for  
38 evidence of interaction of variants in these genes with early growth environments  
39 with indicators for potentially disturbed neurobehavioral development (early  
40 developmental risk environment) or with risk factors from social environment for  
41 normal emotional development (social risk environment). The results are  
42 presented in Table 2 in which nominal P-values are reported.  
43  
44  
45  
46  
47  
48  
49  
50  
51  
52  
53  
54  
55  
56  
57  
58  
59  
60

1  
2  
3 Out of the 69 genetic variants examined, four showed some evidence of  
4 interaction ( $P < 0.05$ ) with high early developmental risk environment with respect  
5 to the HSCL score. Three of the variants were located in *COMT*, namely an  
6 intronic variant rs737866 at the 5' end of the gene ( $P = 0.028$ ), rs2239393  
7 ( $P = 0.005$ ) and rs4680 ( $P = 0.020$ ), and one in the 3' end of *DRD3*, rs9825563  
8 ( $P = 0.045$ ). All of them were associated with HSCL score in individuals of the high  
9 risk group ( $P = 0.036$ ,  $\beta = 0.0414$  for rs737866;  $P = 0.008$ ,  $\beta = 0.0440$  for rs2239393;  
10  $P = 0.042$ ,  $\beta = 0.0320$  for rs4680; and  $P = 0.022$ ,  $\beta = -0.0396$  for rs9825563,  
11 respectively). None of the variants gave evidence of interaction with the social  
12 risk environment in relation to the HSCL score, nor did they show evidence of  
13 gene-environment correlations (rGE). Despite a priori evidence for the role of the  
14 indicators of the risk environments in psychiatric health and wellbeing, the risk  
15 environments did not correlate with the HSCL score. Five of the genetic variants  
16 showed evidence of interaction with gender ( $P < 0.05$ ), including rs737866 and  
17 rs5993883 in *COMT* and rs4274224 in *DRD2*. Out of these, only rs4274224  
18 associated at  $P < 0.05$  with one of the genders ( $P = 0.0006$ ,  $\beta = 0.023$  in males).  
19 Finally, we observed some evidence of association of four variants with the  
20 HSCL score in the complete sample: rs1487275 in *TPH2*, ( $P = 0.049$ ,  $\beta = 0.008$ ),  
21 rs4646316 in *COMT* ( $P = 0.026$ ,  $\beta = 0.012$ ), rs4274224 and rs4581480 in *DRD2*  
22 ( $P = 0.022$ ,  $\beta = 0.011$ ; and  $P = 0.009$ ,  $\beta = 0.022$ , respectively), and rs13106539 in  
23 *DRD5* ( $P = 0.044$ ,  $\beta = -0.008$ ).  
24  
25  
26  
27  
28  
29  
30  
31  
32  
33  
34  
35  
36  
37  
38  
39  
40  
41  
42  
43  
44  
45  
46  
47  
48  
49  
50  
51  
52  
53  
54  
55  
56  
57  
58  
59  
60



1  
2  
3 None of the association findings of these primary analyses, namely interaction  
4 analysis or association analysis in the complete sample, survived correction for  
5 multiple testing. However, post hoc analysis of associations with interaction with  
6 gender lead to a finding close to statistical significance even when taking into  
7 account the amount of multiple testing performed ( $P=0.0006$  for males with  
8 rs4274224 in *DRD2*). Furthermore, as there was an accumulation of association  
9 signals within two highly plausible candidate genes, *DRD2* and *COMT*, we  
10 proceeded to perform haplotype analyses on these genes in order to better  
11 characterize the allelic variants yielding the observed suggestive associations.  
12  
13  
14  
15  
16  
17  
18  
19  
20  
21  
22  
23  
24  
25  
26

### 27 **Haplotype analysis of *COMT* and *DRD2* variants on HSCL score**

28  
29  
30  
31 As described above, two adjacent variants in *COMT*, rs2239393 and rs4680,  
32 showed evidence of interaction with early developmental risk environment,  
33 increasing risk for depressive symptoms in individuals with the high risk  
34 environment (Table 2). We performed 2-SNP and 3-SNP haplotype analyses  
35 combining these SNPs as well as their neighbouring variants using the sliding  
36 window approach. Evidence of association was observed for rs5993883-  
37 rs2239393 haplotype CG spanning a region from the space in-between LD  
38 blocks 1 and 2 to block 2 of *COMT* (Supplementary figure 1) ( $P=0.0049$ ,  
39  $\beta=0.055$ ), for rs2239393-rs4680 haplotype GG in block 2 ( $P=0.0072$ ,  $\beta=0.044$ ),  
40 and for rs5993883-rs2239393-rs4680 haplotype CGG ( $P=0.0046$ ,  $\beta=0.055$ ) in  
41 individuals with the high early developmental risk environment (Table 3).  
42  
43  
44  
45  
46  
47  
48  
49  
50  
51  
52  
53  
54  
55  
56  
57  
58  
59  
60

1  
2  
3 Haplotype analysis of variants outside that region towards both ends of the gene  
4 gave no further evidence for association ( $P > 0.01$  for all allelic combinations).  
5  
6 Thus, the results of these analyses are in synchrony with those of single variants,  
7  
8 as both allele G of rs2239393 and allele G of rs4680 increase risk for depressive  
9  
10 symptoms in individuals with the high early developmental risk environment.  
11  
12  
13

14  
15  
16  
17 As one of the variants in this *COMT* haplotype, rs5993883, also gave evidence of  
18 interaction with gender (Table 2), we further examined association of these  
19 haplotypes in males and females of the high risk group separately. We found that  
20 the haplotypes increased risk for depressive symptoms in males, but not in  
21 females ( $P = 0.004$ ,  $\beta = 0.083$  for rs5993883-rs2239393 haplotype CG;  $P = 0.0037$ ,  
22  $\beta = 0.072$  for rs2239393-rs4680 haplotype GG; and  $P = 0.0053$ ,  $\beta = 0.083$  for  
23 rs5993883-rs2239393-rs4680 haplotype CGG) (Table 3).  
24  
25  
26  
27  
28  
29  
30  
31  
32  
33  
34  
35

36 Two adjacent variants in *DRD2* LD block 3, rs4274224 and rs4581480  
37 (Supplementary figure 1), associated with HSCL score in the complete sample  
38 (regardless of environmental risk) (Table 2). 2-SNP haplotype analysis of these  
39 SNPs as well as their neighbouring variants gave evidence of association of  
40 rs4648318-rs4274224 haplotype GG spanning from block 2 to block 3 of *DRD2*  
41 ( $P = 0.0007$ ,  $\beta = 0.041$ ), rs4274224-rs4581480 haplotype GG in block 3 ( $P = 0.0069$ ,  
42  $\beta = 0.022$ ), and rs4581480-rs7131056 haplotype GA spanning from block 3 to  
43 block 4 ( $P = 0.0071$ ,  $\beta = 0.022$ ) with HSCL score. 3-SNP haplotypes rs4648318-  
44 rs4274224-rs4581480 haplotype GGG ( $P = 0.0027$ ,  $\beta = 0.032$ ), and rs4274224-  
45  
46  
47  
48  
49  
50  
51  
52  
53  
54  
55  
56  
57  
58  
59  
60

1  
2  
3 rs4581480-rs7131056 haplotype GGA ( $P=0.0081$ ,  $\beta=0.021$ ), gave evidence of  
4  
5  
6 association in synchrony with the findings from 2-SNP haplotypes as well as the  
7  
8 single variants (Table 4).  
9

10  
11  
12 As one of the variants contained within these haplotypes, rs4274224, also gave  
13  
14 evidence of interaction with gender as well as association with HSCL score in  
15  
16 males, we also examined association in males alone. The association signal  
17  
18 strengthened for all of the risk haplotypes, being strongest for rs4648318-  
19  
20 rs4274224 haplotype GG ( $P=0.00005$ ,  $\beta=0.069$ ).  
21  
22  
23

24  
25  
26  
27 [Insert Tables 3, 4 and Supplementary figure 1 into the supplementary]  
28  
29  
30

### 31 32 **Haplotype analysis of *COMT* and *DRD2* variants on other neurobehavioral** 33 34 **traits** 35

36  
37  
38 Encouraged by the findings of the haplotype analyses, we tested associations of  
39  
40 haplotypes rs5993883-rs2239393 in *COMT* and rs4648318-rs4274224 in *DRD2*,  
41  
42 as well as the single variant rs737866 in *COMT* to other traits related to  
43  
44 depression, including the HSCL depression and anxiety subscales, depression  
45  
46 diagnosis and TCI temperament trait Harm avoidance (Table 5). In case of both  
47  
48 of the genes, it is evident that the association with HSCL stems mainly from the  
49  
50 subscale reflecting symptoms of depression and not that reflecting anxiety (with  
51  
52 HSCL depression subscale,  $P=0.018$ ,  $\beta=0.075$  for *COMT* haplotype CG and  
53  
54  
55  
56  
57  
58  
59  
60

1  
2  
3 P=0.0015,  $\beta$ =0.060 for *DRD2* haplotype GG; with HSCL anxiety subscale,  
4  
5 P=0.288,  $\beta$ =0.02 and P=0.02 and  $\beta$ =0.033, respectively). We did not detect any  
6  
7  
8 evidence of association with depression diagnosis or with Harm avoidance or its  
9  
10 subcomponents.  
11

12  
13  
14  
15 [Insert Table 5]  
16  
17  
18  
19  
20  
21

## 22 DISCUSSION

23  
24  
25  
26

27 We investigated potential genetic and environmental risk factors for depression in  
28  
29 a genetically isolated Finnish birth cohort by assessing relative impacts of  
30  
31 candidate gene variants from monoamine neurotransmission in environments of  
32  
33 contrasting (high and low) early developmental and social risk. Our study sample  
34  
35 provided evidence of association of allelic variants of *COMT* and *DRD2* with  
36  
37 current symptoms of depression. In case of *COMT* we detected evidence for  
38  
39 interaction with high early developmental risk environment particularly in males.  
40  
41  
42 The genetic risk from *DRD2* seemed, on the other hand, to arise from  
43  
44 mechanisms not related to the environmental risks assessed here. Also here the  
45  
46 associations were detected particularly in males.  
47  
48  
49

50  
51  
52  
53  
54  
55  
56  
57  
58  
59  
60  
61  
62  
63  
64  
65  
66  
67  
68  
69  
70  
71  
72  
73  
74  
75  
76  
77  
78  
79  
80  
81  
82  
83  
84  
85  
86  
87  
88  
89  
90  
91  
92  
93  
94  
95  
96  
97  
98  
99  
100  
101  
102  
103  
104  
105  
106  
107  
108  
109  
110  
111  
112  
113  
114  
115  
116  
117  
118  
119  
120  
121  
122  
123  
124  
125  
126  
127  
128  
129  
130  
131  
132  
133  
134  
135  
136  
137  
138  
139  
140  
141  
142  
143  
144  
145  
146  
147  
148  
149  
150  
151  
152  
153  
154  
155  
156  
157  
158  
159  
160  
161  
162  
163  
164  
165  
166  
167  
168  
169  
170  
171  
172  
173  
174  
175  
176  
177  
178  
179  
180  
181  
182  
183  
184  
185  
186  
187  
188  
189  
190  
191  
192  
193  
194  
195  
196  
197  
198  
199  
200  
201  
202  
203  
204  
205  
206  
207  
208  
209  
210  
211  
212  
213  
214  
215  
216  
217  
218  
219  
220  
221  
222  
223  
224  
225  
226  
227  
228  
229  
230  
231  
232  
233  
234  
235  
236  
237  
238  
239  
240  
241  
242  
243  
244  
245  
246  
247  
248  
249  
250  
251  
252  
253  
254  
255  
256  
257  
258  
259  
260  
261  
262  
263  
264  
265  
266  
267  
268  
269  
270  
271  
272  
273  
274  
275  
276  
277  
278  
279  
280  
281  
282  
283  
284  
285  
286  
287  
288  
289  
290  
291  
292  
293  
294  
295  
296  
297  
298  
299  
300  
301  
302  
303  
304  
305  
306  
307  
308  
309  
310  
311  
312  
313  
314  
315  
316  
317  
318  
319  
320  
321  
322  
323  
324  
325  
326  
327  
328  
329  
330  
331  
332  
333  
334  
335  
336  
337  
338  
339  
340  
341  
342  
343  
344  
345  
346  
347  
348  
349  
350  
351  
352  
353  
354  
355  
356  
357  
358  
359  
360  
361  
362  
363  
364  
365  
366  
367  
368  
369  
370  
371  
372  
373  
374  
375  
376  
377  
378  
379  
380  
381  
382  
383  
384  
385  
386  
387  
388  
389  
390  
391  
392  
393  
394  
395  
396  
397  
398  
399  
400  
401  
402  
403  
404  
405  
406  
407  
408  
409  
410  
411  
412  
413  
414  
415  
416  
417  
418  
419  
420  
421  
422  
423  
424  
425  
426  
427  
428  
429  
430  
431  
432  
433  
434  
435  
436  
437  
438  
439  
440  
441  
442  
443  
444  
445  
446  
447  
448  
449  
450  
451  
452  
453  
454  
455  
456  
457  
458  
459  
460  
461  
462  
463  
464  
465  
466  
467  
468  
469  
470  
471  
472  
473  
474  
475  
476  
477  
478  
479  
480  
481  
482  
483  
484  
485  
486  
487  
488  
489  
490  
491  
492  
493  
494  
495  
496  
497  
498  
499  
500  
501  
502  
503  
504  
505  
506  
507  
508  
509  
510  
511  
512  
513  
514  
515  
516  
517  
518  
519  
520  
521  
522  
523  
524  
525  
526  
527  
528  
529  
530  
531  
532  
533  
534  
535  
536  
537  
538  
539  
540  
541  
542  
543  
544  
545  
546  
547  
548  
549  
550  
551  
552  
553  
554  
555  
556  
557  
558  
559  
560  
561  
562  
563  
564  
565  
566  
567  
568  
569  
570  
571  
572  
573  
574  
575  
576  
577  
578  
579  
580  
581  
582  
583  
584  
585  
586  
587  
588  
589  
590  
591  
592  
593  
594  
595  
596  
597  
598  
599  
600  
601  
602  
603  
604  
605  
606  
607  
608  
609  
610  
611  
612  
613  
614  
615  
616  
617  
618  
619  
620  
621  
622  
623  
624  
625  
626  
627  
628  
629  
630  
631  
632  
633  
634  
635  
636  
637  
638  
639  
640  
641  
642  
643  
644  
645  
646  
647  
648  
649  
650  
651  
652  
653  
654  
655  
656  
657  
658  
659  
660  
661  
662  
663  
664  
665  
666  
667  
668  
669  
670  
671  
672  
673  
674  
675  
676  
677  
678  
679  
680  
681  
682  
683  
684  
685  
686  
687  
688  
689  
690  
691  
692  
693  
694  
695  
696  
697  
698  
699  
700  
701  
702  
703  
704  
705  
706  
707  
708  
709  
710  
711  
712  
713  
714  
715  
716  
717  
718  
719  
720  
721  
722  
723  
724  
725  
726  
727  
728  
729  
730  
731  
732  
733  
734  
735  
736  
737  
738  
739  
740  
741  
742  
743  
744  
745  
746  
747  
748  
749  
750  
751  
752  
753  
754  
755  
756  
757  
758  
759  
760  
761  
762  
763  
764  
765  
766  
767  
768  
769  
770  
771  
772  
773  
774  
775  
776  
777  
778  
779  
780  
781  
782  
783  
784  
785  
786  
787  
788  
789  
790  
791  
792  
793  
794  
795  
796  
797  
798  
799  
800  
801  
802  
803  
804  
805  
806  
807  
808  
809  
810  
811  
812  
813  
814  
815  
816  
817  
818  
819  
820  
821  
822  
823  
824  
825  
826  
827  
828  
829  
830  
831  
832  
833  
834  
835  
836  
837  
838  
839  
840  
841  
842  
843  
844  
845  
846  
847  
848  
849  
850  
851  
852  
853  
854  
855  
856  
857  
858  
859  
860  
861  
862  
863  
864  
865  
866  
867  
868  
869  
870  
871  
872  
873  
874  
875  
876  
877  
878  
879  
880  
881  
882  
883  
884  
885  
886  
887  
888  
889  
890  
891  
892  
893  
894  
895  
896  
897  
898  
899  
900  
901  
902  
903  
904  
905  
906  
907  
908  
909  
910  
911  
912  
913  
914  
915  
916  
917  
918  
919  
920  
921  
922  
923  
924  
925  
926  
927  
928  
929  
930  
931  
932  
933  
934  
935  
936  
937  
938  
939  
940  
941  
942  
943  
944  
945  
946  
947  
948  
949  
950  
951  
952  
953  
954  
955  
956  
957  
958  
959  
960  
961  
962  
963  
964  
965  
966  
967  
968  
969  
970  
971  
972  
973  
974  
975  
976  
977  
978  
979  
980  
981  
982  
983  
984  
985  
986  
987  
988  
989  
990  
991  
992  
993  
994  
995  
996  
997  
998  
999  
1000

1  
2  
3 group from S-adenosylmethionine to the catecholamines. Its enzymatic activity  
4 varies according to a G-to-A transition at codon 158 in the *COMT* gene resulting  
5 in a valine-to-methionine substitution (Val158Met) on the protein level.[27] The  
6 enzyme encoded by the Val158 allele has 3-4 fold higher activity than that  
7 encoded by the Met158 allele. Here, we found association of the haplotype  
8 comprising rs5993883 between LD blocks 1 and 2 of *COMT*, as well as  
9 rs2239393 and rs4680, two variants in virtually complete linkage disequilibrium in  
10 block 2, to depressive symptoms in males with the high developmental risk  
11 environment ( $P=0.0053$ ). The allele G of rs4680 from the high risk haplotype  
12 corresponds to the high activity variant Val158 of *COMT*. This allele has  
13 repeatedly been found to be associated with a poor response to pharmacological  
14 treatment of depression[28, 29] and a European multicenter study identified an  
15 association between that allele and early onset major depression.[30] The  
16 Val158 allele has also earlier been found to associate with cognitive deficits  
17 including poor performance in tasks related to higher-order components of  
18 processing[14] and perseverative errors, less efficient physiologic responses in  
19 the prefrontal cortex,[31] as well as with schizophrenia based on a meta-  
20 analysis,[32] although the effect was not significant when studies with allele  
21 frequencies deviating from Hardy-Weinberg equilibrium were excluded.  
22  
23  
24  
25  
26  
27  
28  
29  
30  
31  
32  
33  
34  
35  
36  
37  
38  
39  
40  
41  
42  
43  
44  
45  
46  
47  
48  
49  
50  
51  
52  
53  
54  
55  
56  
57  
58  
59  
60

Here we observed evidence for interaction of *COMT* with an early risk environment comprised of indicators related to poor neurodevelopment, namely low birth weight, as well as late development of motor system and speech. This

1  
2  
3 interaction could not be explained through gene-environment correlations. Low  
4  
5 birth weight is considered to reflect suboptimal growth environment during fetal  
6  
7 life and it has been found to increase risk for many somatic and psychiatric  
8  
9 diseases, including depression.[23] The observed risk seemed to arise from an  
10  
11 aggregation of these indicators, as none of the risk items separately showed  
12  
13 evidence for GxE with risk variants from *COMT* or *DRD3* (data not shown). This  
14  
15 could relate to the degree of developmental problems altogether, so that mild  
16  
17 signs alone are not sufficient to comprise such an environment that would  
18  
19 interact with *COMT* and affect the development of emotional regulation, at least  
20  
21 not on the level that could be detected in this study. There is some prior evidence  
22  
23 of interaction of *COMT* with a risk environment on psychosis, antisocial  
24  
25 behaviour and dissociation. A study on children with ADHD showed a main gene-  
26  
27 environment interaction of the Val/Val genotype and low birth weight on early-  
28  
29 onset antisocial behaviour,[33] and the Val158 allele was also found to interact  
30  
31 with cannabis use and psychotic symptoms[34] and with increasing levels of  
32  
33 dissociation in those exposed to higher levels of childhood trauma.[35]  
34  
35 Interestingly, a recent report[36] revealed an impact of that polymorphism on  
36  
37 gender-related patterns of regulation of emotions (activation in limbic and  
38  
39 paralimbic regions) in line with findings from the present study.  
40  
41  
42  
43  
44  
45  
46  
47  
48  
49

50 Another major finding of the present study, and statistically the strongest one,  
51  
52 was observed in the dopamine receptor D2 gene *DRD2*, where a haplotype  
53  
54 comprising the intronic variants rs4648318 in LD block 2 and rs4274224 in block  
55  
56  
57  
58  
59  
60

1  
2  
3 was found to associate with depressive symptoms particularly in males,  
4  
5 regardless of their early environment ( $P=0.00005$ ). Dopamine receptors have key  
6  
7 roles in a variety of processes in the vertebrate central nervous system, and  
8  
9 dysfunction in dopaminergic neurotransmission may therefore predispose to a  
10  
11 variety of neuropsychiatric disorders. Among the receptor genes, *DRD2* has  
12  
13 attracted the most attention and has been implied to have a role in the etiology of  
14  
15 several psychiatric disorders. However, there are only a few previous reports on  
16  
17 unipolar depression, including positive,[37] nominal[38] and negative[39, 40]  
18  
19 findings, and results on depression conditional on risk environment.[37, 39, 41]  
20  
21  
22  
23  
24  
25  
26

27 Our varying results for males and females in general imply different mechanisms  
28  
29 of mood regulation and possible gender-specific responses to environmental  
30  
31 effectors. Gender differences in depression[2, 42] as well as temperament  
32  
33 traits[42] have previously been reported in various populations, including the  
34  
35 current one,[43] and the prevalence of depression is higher in women.[44] A true  
36  
37 gender-specific effect of genetic variants on depressiveness would not be  
38  
39 surprising, as there is evidence for example of gender differences in  
40  
41 dopaminergic function[45] that may be estrogen-dependent.  
42  
43  
44  
45  
46  
47

48 It is noteworthy that despite previous reports of the 5-HTTLPR variant,[12] we did  
49  
50 not detect association evidence for *SLC6A4*. However, a recent meta-analysis  
51  
52 did not find any evidence of association with depression alone, or in interaction  
53  
54 with stressful life-events.[13] The *SLC6A4* SNPs included in our study tag the 5-  
55  
56  
57  
58  
59  
60

1  
2  
3 HTTLPR well ( $D' > 0.9$ ), as determined using genotypes from a population-based  
4  
5 Finnish Health 2000 study.[46] Moreover, the LD measure thus obtained is  
6  
7 conservative, since in the population under current study LD has been shown to  
8  
9 be stronger than in the general Finnish population, represented by the Health  
10  
11 2000 study sample.[47]  
12  
13

14  
15  
16  
17 We did not use the Bonferroni correction for multiple testing due to limitations of  
18  
19 sample size and expected magnitude of gene effects in complex traits. Although  
20  
21 the results from the primary analyses (Table 2) do not survive conservative  
22  
23 correction, having a neurobiological a priori hypothesis for these genes'  
24  
25 involvement in depressiveness supports their validity. Furthermore, additional  
26  
27 analyses performed on the variants that had given any evidence of interaction in  
28  
29 the primary analyses yielded a relatively strong association signal of *DRD2*'s  
30  
31 rs4274224 with HSCL score in males ( $P=0.0006$ ), which remains close to  
32  
33 statistical significance even when taking into account the amount of multiple  
34  
35 testing performed. The finding was further supported by results of analysis of  
36  
37 haplotypes containing rs4274224, showing a statistically significant association  
38  
39 with HSCL score in males ( $P=0.00005$ ).  
40  
41  
42  
43  
44  
45  
46  
47

48  
49 There are some limitations in the present study. First, it is notable that  
50  
51 depression as defined here did not necessary signify a clinical diagnosis of major  
52  
53 depression. Instead it was defined either based on self-report or on the score  
54  
55 from HSCL, which as a measure has its limitations. However, the prevalence of  
56  
57  
58  
59  
60



1  
2  
3 depressed mood was in the same range as in earlier reports.[1, 48] Secondly,  
4  
5 there was a notable drop-out rate among the original material of all cohort  
6  
7 members. About half of the original cohort members did not participate in this  
8  
9 study. Finally, when the NFBC 1966 study was initiated it was not possible to  
10  
11 predict that an investigation such as the present one would one day be  
12  
13 conducted. Therefore, we are limited by the original choice of variables to be  
14  
15 collected. It is also noteworthy that we did not detect association with our  
16  
17 measure of current depression of either the early social or the developmental risk  
18  
19 environment, despite them being formulated based on previous reports of their  
20  
21 effects on psychiatric health and wellbeing.[23-26] However, the effect of genetic  
22  
23 risk may be modulated by early life stress even though the direct link between  
24  
25 early life environment and current status would be missing, and this modulating  
26  
27 effect may be seen in the results of the GxE analysis.  
28  
29  
30  
31  
32  
33  
34  
35

36 The current study has several potential advantages, such as the availability of  
37  
38 longitudinal follow-up data starting antenatally enabling us to include the  
39  
40 environmental dimension without any risk of recall bias. Another advantage is the  
41  
42 unique genetic structure of our study cohort, characterized by isolation, founder  
43  
44 effect, multiple bottlenecks and more genetic homogeneity compared to many  
45  
46 other isolates,[49] allowing us to identify genetic risk loci that may be missed in  
47  
48 the screening of other more heterogeneous populations. Furthermore, the  
49  
50 subjects were representative, with all cohort members born in the same year and  
51  
52 within a geographically defined area.  
53  
54  
55  
56  
57  
58  
59  
60

1  
2  
3  
4  
5  
6 Furthermore, the size of the sample is sufficient to identify genetic variants of  
7 moderate impact. We also have both genders represented in almost equal  
8 amounts (48% males, 52% females), which is notable since gender differences  
9 are evident both in depression[2, 42] and in temperament traits, for example  
10 Harm avoidance.[42] It is also beneficial that the sample is a one-year birth  
11 cohort, as it is well established that some psychiatric traits, such as Harm  
12 avoidance[50] of temperament, are age-dependent. We can therefore isolate  
13 genetic effects from the effects of aging. Furthermore, we provide a complete  
14 coverage of the major candidate genes that are relevant with the present focus.  
15  
16  
17  
18  
19  
20  
21  
22  
23  
24  
25  
26  
27  
28

29 Our results support the role of *COMT* and *DRD2*, two genes of monoamine  
30 neurotransmission, in the etiology of depression particularly in males, and they  
31 imply gender-specific mechanisms of mood regulation and responses to risk  
32 environments. The findings imply that the role of monoaminergic genes in  
33 depression should be examined further in future studies. However, these findings  
34 are pending replication in other, independent population samples.  
35  
36  
37  
38  
39  
40  
41  
42  
43  
44  
45  
46  
47

#### 48 **ACKNOWLEDGEMENTS, COMPETING INTERESTS, FUNDING**

49  
50  
51  
52

53 This study was funded by the Academy of Finland's CoE in Complex Disease  
54 Genetics; the Biocentrum Helsinki Foundation; the Academy of Finland's grant to  
55  
56  
57  
58  
59  
60

1  
2  
3 the NFBC Studies, to Dr. Tiina Paunio, Post-doctoral Fellowship to Dr. Anu  
4 Loukola and Academy Researcher Fellowship to Dr. Jouko Miettunen; the  
5 University of Helsinki Research Foundation grant for young researchers to Emma  
6 Nyman; and the Signe and Ane Gyllenberg Foundation grant to Dr. Pirjo Mäki.  
7  
8 There are no significant competing financial, professional or personal interests  
9 that could have influenced the performance or presentation of the current study.  
10  
11  
12  
13  
14  
15  
16  
17  
18  
19  
20  
21

## 22 **CONTRIBUTORS**

23  
24  
25  
26  
27 Emma Nyman, Tiina Paunio, Jouko Miettunen, Matti Joukamaa and Juha Veijola  
28 designed the study and wrote the protocol, with help also from Nelson Freimer,  
29 Pirjo Mäki, Leena Peltonen and Marjo-Riitta Järvelin. Emma Nyman and to some  
30 extent Tiina Paunio also managed the literature searches and analyses. Emma  
31 Nyman and Sonja Sulkava undertook the statistical analysis. Emma Nyman  
32 wrote the first draft of the manuscript, and Tiina Paunio and Sonja Sulkava also  
33 contributed to its later versions. All authors contributed to and have approved the  
34 final manuscript.  
35  
36  
37  
38  
39  
40  
41  
42  
43  
44  
45  
46  
47  
48  
49

## 50 **COPYRIGHT LICENCE STATEMENT**

The Corresponding Author has the right to grant on behalf of all authors and does grant on behalf of all authors, an exclusive licence to the BMJ Publishing Group Ltd to permit this article (if accepted) to be published in BMJ Open.

For peer review only

1  
2  
3  
4  
5  
6  
7  
8  
9  
10  
11  
12  
13  
14  
15  
16  
17  
18  
19  
20  
21  
22  
23  
24  
25  
26  
27  
28  
29  
30  
31  
32  
33  
34  
35  
36  
37  
38  
39  
40  
41  
42  
43  
44  
45  
46  
47  
48  
49  
50  
51  
52  
53  
54  
55  
56  
57  
58  
59  
60

**REFERENCES**

- 1 Kessler RC, Berglund P, Demler O, Jin R, Koretz D, Merikangas KR, Rush AJ, Walters EE, Wang PS. The epidemiology of major depressive disorder: results from the National Comorbidity Survey Replication (NCS-R). *Jama*. 2003;289:3095-105.
- 2 Kendler KS, Gatz M, Gardner CO, Pedersen NL. A Swedish national twin study of lifetime major depression. *Am J Psychiatry*. 2006;163:109-14.
- 3 Bosker FJ, Hartman CA, Nolte IM, Prins BP, Terpstra P, Posthuma D, van Veen T, Willemsen G, Derijk RH, de Geus EJ, Hoogendijk WJ, Sullivan PF, Penninx BW, Boomsma DI, Snieder H, Nolen WA. Poor replication of candidate genes for major depressive disorder using genome-wide association data. *Mol Psychiatry*.
- 4 Melartin TK, Rytsala HJ, Leskela US, Lestela-Mielonen PS, Sokero TP, Isometsa ET. Current comorbidity of psychiatric disorders among DSM-IV major depressive disorder patients in psychiatric care in the Vantaa Depression Study. *J Clin Psychiatry*. 2002;63:126-34.
- 5 Jylha P, Isometsa E. The relationship of neuroticism and extraversion to symptoms of anxiety and depression in the general population. *Depress Anxiety*. 2006;23:281-9.
- 6 Jylha P, Isometsa E. Temperament, character and symptoms of anxiety and depression in the general population. *Eur Psychiatry*. 2006;21:389-95.
- 7 Cloninger CR, Svrakic DM, Przybeck TR. Can personality assessment predict future depression? A twelve-month follow-up of 631 subjects. *J Affect Disord*. 2006;92:35-44.

- 1  
2  
3  
4 8     Ansorge MS, Hen R, Gingrich JA. Neurodevelopmental origins of depressive  
5  
6 disorders. *Curr Opin Pharmacol.* 2007;7:8-17.  
7  
8  
9 9     Caspi A, Moffitt TE. Gene-environment interactions in psychiatry: joining forces  
10  
11 with neuroscience. *Nat Rev Neurosci.* 2006;7:583-90.  
12  
13 10     Schildkraut JJ. The catecholamine hypothesis of affective disorders: a review of  
14  
15 supporting evidence. *Am J Psychiatry.* 1965;122:509-22.  
16  
17  
18 11     Meyer-Lindenberg A. Neural connectivity as an intermediate phenotype: brain  
19  
20 networks under genetic control. *Hum Brain Mapp.* 2009;30:1938-46.  
21  
22  
23 12     Caspi A, Sugden K, Moffitt TE, Taylor A, Craig IW, Harrington H, McClay J,  
24  
25 Mill J, Martin J, Braithwaite A, Poulton R. Influence of life stress on depression:  
26  
27 moderation by a polymorphism in the 5-HTT gene. *Science.* 2003;301:386-9.  
28  
29  
30 13     Risch N, Herrell R, Lehner T, Liang KY, Eaves L, Hoh J, Griem A, Kovacs M,  
31  
32 Ott J, Merikangas KR. Interaction between the serotonin transporter gene (5-HTTLPR),  
33  
34 stressful life events, and risk of depression: a meta-analysis. *Jama.* 2009;301:2462-71.  
35  
36  
37 14     Bruder GE, Keilp JG, Xu H, Shikhman M, Schori E, Gorman JM, Gilliam TC.  
38  
39 Catechol-O-methyltransferase (COMT) genotypes and working memory: associations  
40  
41 with differing cognitive operations. *Biol Psychiatry.* 2005;58:901-7.  
42  
43  
44 15     Brunner HG, Nelen M, Breakefield XO, Ropers HH, van Oost BA. Abnormal  
45  
46 behavior associated with a point mutation in the structural gene for monoamine oxidase  
47  
48 A. *Science.* 1993;262:578-80.  
49  
50  
51 16     Caspi A, McClay J, Moffitt TE, Mill J, Martin J, Craig IW, Taylor A, Poulton R.  
52  
53 Role of genotype in the cycle of violence in maltreated children. *Science.* 2002;297:851-  
54  
55  
56  
57  
58  
59  
60 4.

- 1  
2  
3  
4  
5  
6  
7  
8  
9  
10  
11  
12  
13  
14  
15  
16  
17  
18  
19  
20  
21  
22  
23  
24  
25  
26  
27  
28  
29  
30  
31  
32  
33  
34  
35  
36  
37  
38  
39  
40  
41  
42  
43  
44  
45  
46  
47  
48  
49  
50  
51  
52  
53  
54  
55  
56  
57  
58  
59  
60
- 17 Rantakallio P. Groups at risk in low birth weight infants and perinatal mortality. *Acta Paediatr Scand.* 1969;193:Suppl 193:1+.
- 18 Haapea M, Miettunen J, Laara E, Joukamaa MI, Jarvelin MR, Isohanni MK, Veijola JM. Non-participation in a field survey with respect to psychiatric disorders. *Scand J Public Health.* 2008;36:728-36.
- 19 Veijola J, Jokelainen J, Laksy K, Kantojarvi L, Kokkonen P, Jarvelin MR, Joukamaa M. The Hopkins Symptom Checklist-25 in screening DSM-III-R axis-I disorders. *Nord J Psychiatry.* 2003;57:119-23.
- 20 Miettunen J, Kantojarvi L, Ekelund J, Veijola J, Karvonen JT, Peltonen L, Jarvelin MR, Freimer N, Lichtermann D, Joukamaa M. A large population cohort provides normative data for investigation of temperament. *Acta Psychiatr Scand.* 2004;110:150-7.
- 21 Cloninger CR, Svrakic DM, Przybeck TR. A psychobiological model of temperament and character. *Arch Gen Psychiatry.* 1993;50:975-90.
- 22 Winokur A, Winokur DF, Rickels K, Cox DS. Symptoms of emotional distress in a family planning service: stability over a four-week period. *Br J Psychiatry.* 1984;144:395-9.
- 23 Barker DJ, Osmond C, Forsen TJ, Kajantie E, Eriksson JG. Trajectories of growth among children who have coronary events as adults. *N Engl J Med.* 2005;353:1802-9.
- 24 Isohanni M, Jones PB, Moilanen K, Rantakallio P, Veijola J, Oja H, Koironen M, Jokelainen J, Croudace T, Jarvelin M. Early developmental milestones in adult schizophrenia and other psychoses. A 31-year follow-up of the Northern Finland 1966 Birth Cohort. *Schizophr Res.* 2001;52:1-19.

- 1  
2  
3 25 Myhrman A, Rantakallio P, Isohanni M, Jones P, Partanen U. Unwantedness of a  
4 pregnancy and schizophrenia in the child. *Br J Psychiatry*. 1996;169:637-40.  
5  
6  
7  
8 26 Goodman E, Huang B. Socioeconomic status, depressive symptoms, and  
9 adolescent substance use. *Arch Pediatr Adolesc Med*. 2002;156:448-53.  
10  
11  
12 27 Lachman HM, Papolos DF, Saito T, Yu YM, Szumlanski CL, Weinshilboum RM.  
13 Human catechol-O-methyltransferase pharmacogenetics: description of a functional  
14 polymorphism and its potential application to neuropsychiatric disorders.  
15 *Pharmacogenetics*. 1996;6:243-50.  
16  
17  
18  
19  
20  
21 28 Tsai SJ, Gau YT, Hong CJ, Liou YJ, Yu YW, Chen TJ. Sexually dimorphic effect  
22 of catechol-O-methyltransferase val158met polymorphism on clinical response to  
23 fluoxetine in major depressive patients. *J Affect Disord*. 2009;113:183-7.  
24  
25  
26  
27  
28  
29 29 Baune BT, Hohoff C, Berger K, Neumann A, Mortensen S, Roehrs T, Deckert J,  
30 Arolt V, Domschke K. Association of the COMT val158met variant with antidepressant  
31 treatment response in major depression. *Neuropsychopharmacology*. 2008;33:924-32.  
32  
33  
34  
35  
36 30 Massat I, Souery D, Del-Favero J, Nothen M, Blackwood D, Muir W, Kaneva R,  
37 Serretti A, Lorenzi C, Rietschel M, Milanova V, Papadimitriou GN, Dikeos D, Van  
38 Broekhoven C, Mendlewicz J. Association between COMT (Val158Met) functional  
39 polymorphism and early onset in patients with major depressive disorder in a European  
40 multicenter genetic association study. *Mol Psychiatry*. 2005;10:598-605.  
41  
42  
43  
44  
45  
46  
47  
48 31 Egan MF, Goldberg TE, Kolachana BS, Callicott JH, Mazzanti CM, Straub RE,  
49 Goldman D, Weinberger DR. Effect of COMT Val108/158 Met genotype on frontal lobe  
50 function and risk for schizophrenia. *Proc Natl Acad Sci U S A*. 2001;98:6917-22.  
51  
52  
53  
54  
55  
56  
57  
58  
59  
60



- 1  
2  
3 32 Munafo MR, Bowes L, Clark TG, Flint J. Lack of association of the COMT  
4 (Val158/108 Met) gene and schizophrenia: a meta-analysis of case-control studies. *Mol*  
5  
6 *Psychiatry*. 2005;10:765-70.  
7  
8  
9  
10 33 Thapar A, Langley K, Fowler T, Rice F, Turic D, Whittinger N, Aggleton J, Van  
11  
12 den Bree M, Owen M, O'Donovan M. Catechol O-methyltransferase gene variant and  
13  
14 birth weight predict early-onset antisocial behavior in children with attention-  
15  
16 deficit/hyperactivity disorder. *Arch Gen Psychiatry*. 2005;62:1275-8.  
17  
18  
19 34 Caspi A, Moffitt TE, Cannon M, McClay J, Murray R, Harrington H, Taylor A,  
20  
21 Arseneault L, Williams B, Braithwaite A, Poulton R, Craig IW. Moderation of the effect  
22  
23 of adolescent-onset cannabis use on adult psychosis by a functional polymorphism in the  
24  
25 catechol-O-methyltransferase gene: longitudinal evidence of a gene X environment  
26  
27 interaction. *Biol Psychiatry*. 2005;57:1117-27.  
28  
29  
30 35 Savitz JB, van der Merwe L, Newman TK, Solms M, Stein DJ, Ramesar RS. The  
31  
32 relationship between childhood abuse and dissociation. Is it influenced by catechol-O-  
33  
34 methyltransferase (COMT) activity? *Int J Neuropsychopharmacol*. 2008;11:149-61.  
35  
36  
37 36 Kempton MJ, Haldane M, Jogia J, Christodoulou T, Powell J, Collier D, Williams  
38  
39 SC, Frangou S. The effects of gender and COMT Val158Met polymorphism on fearful  
40  
41 facial affect recognition: a fMRI study. *Int J Neuropsychopharmacol*. 2009;12:371-81.  
42  
43  
44 37 Guo G, Tillman KH. Trajectories of depressive symptoms, dopamine D2 and D4  
45  
46 receptors, family socioeconomic status and social support in adolescence and young  
47  
48 adulthood. *Psychiatr Genet*. 2009;19:14-26.  
49  
50  
51 38 Koks S, Nikopensus T, Koido K, Maron E, Altmae S, Heinaste E, Vabrit K,  
52  
53 Tammekivi V, Hallast P, Kurg A, Shlik J, Vasar V, Metspalu A, Vasar E. Analysis of  
54  
55  
56  
57  
58  
59  
60

1  
2  
3 SNP profiles in patients with major depressive disorder. *Int J Neuropsychopharmacol*.  
4 2006;9:167-74.  
5

6  
7  
8 39 Vaske J, Makarios M, Boisvert D, Beaver KM, Wright JP. The interaction of  
9  
10 DRD2 and violent victimization on depression: an analysis by gender and race. *J Affect*  
11  
12 *Disord*. 2009;112:120-5.  
13

14  
15 40 Furlong RA, Coleman TA, Ho L, Rubinsztein JS, Walsh C, Paykel ES,  
16  
17 Rubinsztein DC. No association of a functional polymorphism in the dopamine D2  
18  
19 receptor promoter region with bipolar or unipolar affective disorders. *Am J Med Genet*.  
20  
21 1998;81:385-7.  
22  
23

24  
25 41 Elovainio M, Jokela M, Kivimaki M, Pulkki-Raback L, Lehtimaki T, Airla N,  
26  
27 Keltikangas-Jarvinen L. Genetic variants in the DRD2 gene moderate the relationship  
28  
29 between stressful life events and depressive symptoms in adults: cardiovascular risk in  
30  
31 young Finns study. *Psychosom Med*. 2007;69:391-5.  
32  
33

34  
35 42 Miettunen J, Veijola J, Lauronen E, Kantojarvi L, Joukamaa M. Sex differences  
36  
37 in Cloninger's temperament dimensions--a meta-analysis. *Compr Psychiatry*.  
38  
39 2007;48:161-9.  
40

41  
42 43 Herva A, Laitinen J, Miettunen J, Veijola J, Karvonen JT, Lakso K, Joukamaa M.  
43  
44 Obesity and depression: results from the longitudinal Northern Finland 1966 Birth Cohort  
45  
46 Study. *Int J Obes (Lond)*. 2006;30:520-7.  
47

48  
49 44 Kuehner C. Gender differences in unipolar depression: an update of  
50  
51 epidemiological findings and possible explanations. *Acta Psychiatr Scand*. 2003;108:163-  
52  
53 74.  
54  
55  
56  
57  
58  
59  
60

- 1  
2  
3  
4 45 Andersen SL, Teicher MH. Sex differences in dopamine receptors and their  
5  
6 relevance to ADHD. *Neurosci Biobehav Rev.* 2000;24:137-41.  
7
- 8 46 Utge S, Soronen P, Partonen T, Loukola A, Kronholm E, Pirkola S, Nyman E,  
9  
10 Porkka-Heiskanen T, Paunio T. A population-based association study of candidate genes  
11  
12 for depression and sleep disturbance. *Am J Med Genet B Neuropsychiatr Genet.* 2009.  
13  
14
- 15 47 Jakkula E, Rehnstrom K, Varilo T, Pietilainen OP, Paunio T, Pedersen NL,  
16  
17 deFaire U, Jarvelin MR, Saharinen J, Freimer N, Ripatti S, Purcell S, Collins A, Daly MJ,  
18  
19 Palotie A, Peltonen L. The genome-wide patterns of variation expose significant  
20  
21 substructure in a founder population. *Am J Hum Genet.* 2008;83:787-94.  
22  
23
- 24 48 Suvisaari J, Aalto-Setälä T, Tuulio-Henriksson A, Harkanen T, Saarni SI, Perala  
25  
26 J, Schreck M, Castaneda A, Hintikka J, Kestila L, Lahteenmaki S, Latvala A, Koskinen  
27  
28 S, Marttunen M, Aro H, Lonnqvist J. Mental disorders in young adulthood. *Psychol Med.*  
29  
30 2009;39:287-99.  
31  
32
- 33 49 Service S, DeYoung J, Karayiorgou M, Roos JL, Pretorius H, Bedoya G, Ospina  
34  
35 J, Ruiz-Linares A, Macedo A, Palha JA, Heutink P, Aulchenko Y, Oostra B, van Duijn C,  
36  
37 Jarvelin MR, Varilo T, Peddle L, Rahman P, Piras G, Monne M, Murray S, Galver L,  
38  
39 Peltonen L, Sabatti C, Collins A, Freimer N. Magnitude and distribution of linkage  
40  
41 disequilibrium in population isolates and implications for genome-wide association  
42  
43 studies. *Nat Genet.* 2006;38:556-60.  
44  
45
- 46 50 Brandstrom S, Schlette P, Przybeck TR, Lundberg M, Forsgren T, Sigvardsson S,  
47  
48 Nylander PO, Nilsson LG, Cloninger RC, Adolfsson R. Swedish normative data on  
49  
50 personality using the Temperament and Character Inventory. *Compr Psychiatry.*  
51  
52 1998;39:122-8.  
53  
54  
55  
56  
57  
58  
59  
60

1  
2  
3  
4  
5  
6  
7  
8  
9  
10  
11  
12  
13  
14  
15  
16  
17  
18  
19  
20  
21  
22  
23  
24  
25  
26  
27  
28  
29  
30  
31  
32  
33  
34  
35  
36  
37  
38  
39  
40  
41  
42  
43  
44  
45  
46  
47  
48  
49  
50  
51  
52  
53  
54  
55  
56  
57  
58  
59  
60

For peer review only

**Table 1.** Composition of the study sample from the NFBC 1966.

|                | <i>N</i> | <i>HSCL score &gt; 1.75</i> | <i>Depression diagnosis</i> | <i>Early developmental risk environment<sup>1</sup></i> |                  |                       | <i>Social risk environment<sup>2</sup></i> |                 |                       |
|----------------|----------|-----------------------------|-----------------------------|---------------------------------------------------------|------------------|-----------------------|--------------------------------------------|-----------------|-----------------------|
|                |          |                             |                             | <i>High-risk<sup>3</sup></i>                            | <i>sLow-risk</i> | <i>nd<sup>4</sup></i> | <i>High-risk<sup>3</sup></i>               | <i>Low-risk</i> | <i>nd<sup>4</sup></i> |
| <i>Males</i>   | 2509     | 169 (7%)                    | 79(3%)                      | 229 (9%)                                                | 2094 (83%)       | 186 (7%)              | 912 (36%)                                  | 1574 (63%)      | 23 (0.9%)             |
| <i>Females</i> | 2716     | 269(10%)                    | 136(5%)                     | 193 (7%)                                                | 2328 (86%)       | 195 (7%)              | 1034 (38%)                                 | 1649 (61%)      | 33 (1.2%)             |
| <i>All</i>     | 5225     | 438(8%)                     | 215(4%)                     | 422 (8%)                                                | 4422 (85%)       | 381 (7%)              | 1946 (37%)                                 | 3223 (62%)      | 56 (1.1%)             |

<sup>1</sup> Defined by the presence of two out of three possible indicators for the early developmental risk environment: low birth weight, late motor development, and late development of speech.

<sup>2</sup> Defined by the presence of two out of five possible indicators for the social risk environment: unwantedness of pregnancy, low socio-economic status, single parenthood, low level of education of mother, and low activity for information retrieval by the mother. For further details, see text.

<sup>3</sup> Both early developmental and environmental risk present in 92 males (3,6%) and 67 females (2,4%).

<sup>4</sup> Not defined.

**Table 2.** Interaction between genetic variants of genes of monoamine neurotransmission and early developmental risk environment (GxE<sub>Dev</sub>),<sup>1</sup> social risk environment (GxE<sub>Soc</sub>),<sup>2</sup> and gender (GxSex) on current depressive symptoms (HSCL score), and genetic association to HSCL score in the complete study sample from the NFBC 1966 (All). The analyses were performed using PLINK's linear regression model and interaction analysis. Empirical P-values based on max(T) permutation are reported, with P-values <0.05 shown in bold.

| Gene      | Chromosome | SNP        | Position/bp | Minor allele | MAF <sup>3</sup> | P(GxE <sub>Dev</sub> )   | P(GxE <sub>Soc</sub> ) | P(GxSex)                 | P(All)                    |
|-----------|------------|------------|-------------|--------------|------------------|--------------------------|------------------------|--------------------------|---------------------------|
| SLC6A4    | 17         | rs1906451  | 25539605    | G            | 0.44             | 0.608                    | 0.363                  | 0.784                    | 0.268                     |
|           |            | rs3794808  | 25555919    | A            | 0.41             | 0.365                    | 0.263                  | 0.799                    | 0.320                     |
|           |            | rs140700   | 25567515    | A            | 0.09             | 0.133                    | 0.460                  | <b>0.037<sup>8</sup></b> | 0.876                     |
|           |            | rs2066713  | 25575791    | A            | 0.46             | 0.253                    | 0.499                  | 0.505                    | 0.550                     |
|           |            | rs8071667  | 25576899    | A            | 0.15             | 0.473                    | 0.682                  | 0.122                    | 0.606                     |
| TPH2      | 12         | rs4131348  | 70610746    | G            | 0.12             | 0.844                    | 0.937                  | 0.400                    | 0.497                     |
|           |            | rs2129575  | 70626340    | A            | 0.22             | 0.787                    | 0.682                  | 0.432                    | 0.423                     |
|           |            | rs1386496  | 70637057    | G            | 0.16             | 0.983                    | 0.404                  | 0.293                    | 0.792                     |
|           |            | rs2171363  | 70646531    | A            | 0.43             | 0.762                    | 0.983                  | <b>0.016<sup>8</sup></b> | 0.814                     |
|           |            | rs10506645 | 70671767    | A            | 0.23             | 0.996                    | 0.756                  | 0.102                    | 0.789                     |
|           |            | rs1386497  | 70678557    | C            | 0.17             | 0.816                    | 0.131                  | 0.452                    | 0.797                     |
|           |            | rs1487276  | 70691326    | A            | 0.21             | 0.888                    | 0.088                  | 0.838                    | 0.908                     |
|           |            | rs9325202  | 70693744    | A            | 0.48             | 0.805                    | 0.074                  | 0.488                    | 0.473                     |
|           |            | rs1487275  | 70696559    | C            | 0.37             | 0.972                    | 0.054                  | 0.625                    | <b>0.049<sup>10</sup></b> |
| rs1386483 | 70698761   | A          | 0.47        | 0.574        | 0.090            | 0.326                    | 0.437                  |                          |                           |
| rs1872824 | 70716581   | A          | 0.35        | 0.652        | 0.121            | 0.211                    | 0.494                  |                          |                           |
| COMT      | 22         | rs6518591  | 18304021    | G            | 0.16             | 0.688                    | 0.255                  | 0.919                    | 0.303                     |
|           |            | rs737866   | 18310109    | G            | 0.18             | <b>0.028<sup>4</sup></b> | 0.853                  | <b>0.024<sup>8</sup></b> | 0.755                     |
|           |            | rs1544325  | 18311668    | G            | 0.48             | 0.318                    | 0.376                  | 0.192                    | 0.822                     |
|           |            | rs174675   | 18314051    | A            | 0.29             | 0.465                    | 0.278                  | 0.580                    | 0.958                     |
|           |            | rs5993883  | 18317638    | C            | 0.36             | 0.230                    | 0.495                  | <b>0.025<sup>8</sup></b> | 0.920                     |

|    |      |    |            |           |   |      |       |       |                    |                     |
|----|------|----|------------|-----------|---|------|-------|-------|--------------------|---------------------|
| 1  |      |    |            |           |   |      |       |       |                    |                     |
| 2  |      |    |            |           |   |      |       |       |                    |                     |
| 3  |      |    |            |           |   |      |       |       |                    |                     |
| 4  |      |    |            |           |   |      |       |       |                    |                     |
| 5  |      |    |            |           |   |      |       |       |                    |                     |
| 6  |      |    |            |           |   |      |       |       |                    |                     |
| 7  |      |    |            |           |   |      |       |       |                    |                     |
| 8  |      |    |            |           |   |      |       |       |                    |                     |
| 9  |      |    |            |           |   |      |       |       |                    |                     |
| 10 |      |    |            |           |   |      |       |       |                    |                     |
| 11 |      |    |            |           |   |      |       |       |                    |                     |
| 12 |      |    |            |           |   |      |       |       |                    |                     |
| 13 | MAOA | X  | rs909525   | 43438146  | G | 0.45 | 0.559 | 0.871 | 0.554              | 0.165               |
| 14 |      |    | rs12843268 | 43458610  | A | 0.40 | 0.271 | 0.837 | 0.266              | 0.103               |
| 15 |      |    | rs6610845  | 43472954  | G | 0.41 | 0.232 | 0.795 | 0.263              | 0.170               |
| 16 |      |    | rs3027409  | 43491977  | C | 0.02 | 0.748 | 0.928 | 0.950              | 0.194               |
| 17 |      |    | rs6609257  | 43497652  | G | 0.50 | 0.848 | 0.320 | 0.470              | 0.077               |
| 18 |      |    | rs3027415  | 43499385  | G | 0.18 | 0.218 | 0.550 | 0.905              | 0.613               |
| 19 |      |    |            |           |   |      |       |       |                    |                     |
| 20 |      |    |            |           |   |      |       |       |                    |                     |
| 21 | DRD1 | 5  | rs265973   | 174793305 | G | 0.50 | 0.529 | 0.614 | 0.549              | 0.888               |
| 22 |      |    | rs265974   | 174793846 | G | 0.35 | 0.391 | 0.612 | 0.912              | 0.659               |
| 23 |      |    | rs265976   | 174795026 | A | 0.23 | 0.578 | 0.707 | 0.915              | 0.826               |
| 24 |      |    | rs5326     | 174802802 | A | 0.19 | 0.615 | 0.886 | 0.852              | 0.588               |
| 25 |      |    |            |           |   |      |       |       |                    |                     |
| 26 |      |    |            |           |   |      |       |       |                    |                     |
| 27 | DRD2 | 11 | rs1800497  | 112776038 | A | 0.17 | 0.079 | 0.825 | 0.691              | 0.467               |
| 28 |      |    | rs2242592  | 112784640 | G | 0.37 | 0.757 | 0.466 | 0.283              | 0.736               |
| 29 |      |    | rs1076563  | 112801119 | C | 0.50 | 0.053 | 0.813 | 0.897              | 0.662               |
| 30 |      |    | rs2471857  | 112803549 | A | 0.17 | 0.518 | 0.494 | 0.823              | 0.901               |
| 31 |      |    | rs4620755  | 112814829 | A | 0.22 | 0.383 | 0.997 | 0.951              | 0.176               |
| 32 |      |    | rs7125415  | 112815891 | A | 0.19 | 0.084 | 0.389 | 0.789              | 0.231               |
| 33 |      |    | rs4648318  | 112818599 | G | 0.34 | 0.711 | 0.885 | 0.631              | 0.684               |
| 34 |      |    | rs4274224  | 112824662 | G | 0.24 | 0.067 | 0.777 | 0.017 <sup>9</sup> | 0.022 <sup>12</sup> |
| 35 |      |    | rs4581480  | 112829684 | G | 0.07 | 0.184 | 0.521 | 0.210              | 0.009 <sup>13</sup> |
| 36 |      |    | rs7131056  | 112834984 | C | 0.49 | 0.564 | 0.795 | 0.413              | 0.964               |
| 37 |      |    | rs4938019  | 112846601 | G | 0.23 | 0.069 | 0.651 | 0.643              | 0.584               |
| 38 |      |    |            |           |   |      |       |       |                    |                     |
| 39 |      |    |            |           |   |      |       |       |                    |                     |
| 40 |      |    |            |           |   |      |       |       |                    |                     |
| 41 |      |    |            |           |   |      |       |       |                    |                     |
| 42 |      |    |            |           |   |      |       |       |                    |                     |
| 43 |      |    |            |           |   |      |       |       |                    |                     |
| 44 |      |    |            |           |   |      |       |       |                    |                     |
| 45 |      |    |            |           |   |      |       |       |                    |                     |
| 46 |      |    |            |           |   |      |       |       |                    |                     |
| 47 |      |    |            |           |   |      |       |       |                    |                     |

1  
2  
3  
4  
5  
6  
7  
8  
9  
10  
11  
12  
13  
14  
15  
16  
17  
18  
19  
20  
21  
22  
23  
24  
25  
26  
27  
28  
29  
30  
31  
32  
33  
34  
35  
36  
37  
38  
39  
40  
41  
42  
43  
44  
45  
46  
47

|             |    |  |            |           |   |      |                           |       |       |                            |
|-------------|----|--|------------|-----------|---|------|---------------------------|-------|-------|----------------------------|
|             |    |  | rs12364283 | 112852165 | G | 0.08 | 0.280                     | 0.504 | 0.441 | 0.861                      |
|             |    |  | rs10891556 | 112857971 | A | 0.24 | 0.076                     | 0.519 | 0.638 | 0.589                      |
|             |    |  | rs6589377  | 112860946 | G | 0.17 | 0.286                     | 0.617 | 0.061 | 0.552                      |
| <i>DRD3</i> | 3  |  | rs2087017  | 115324703 | G | 0.43 | 0.937                     | 0.921 | 0.606 | 0.743                      |
|             |    |  | rs2134655  | 115340891 | A | 0.28 | 0.454                     | 0.554 | 0.129 | 0.507                      |
|             |    |  | rs963468   | 115345577 | A | 0.38 | 0.809                     | 0.777 | 0.902 | 0.608                      |
|             |    |  | rs3773678  | 115352768 | A | 0.06 | 0.780                     | 0.855 | 0.487 | 0.770                      |
|             |    |  | rs2630351  | 115357749 | A | 0.03 | 0.954                     | 0.144 | 0.168 | 0.999                      |
|             |    |  | rs167771   | 115358965 | G | 0.18 | 0.862                     | 0.638 | 0.406 | 0.514                      |
|             |    |  | rs167770   | 115362252 | G | 0.31 | 0.260                     | 0.911 | 0.298 | 0.694                      |
|             |    |  | rs226082   | 115363703 | G | 0.31 | 0.261                     | 0.911 | 0.301 | 0.690                      |
|             |    |  | rs324029   | 115364313 | A | 0.31 | 0.259                     | 0.913 | 0.296 | 0.722                      |
|             |    |  | rs10934256 | 115368342 | A | 0.17 | 0.229                     | 0.898 | 0.478 | 0.246                      |
|             |    |  | rs1486009  | 115371222 | G | 0.12 | 0.721                     | 0.667 | 0.745 | 0.571                      |
|             |    |  | rs6280     | 115373505 | G | 0.33 | 0.159                     | 0.485 | 0.141 | 0.667                      |
|             |    |  | rs9825563  | 115382910 | G | 0.23 | <b>0.045</b> <sup>7</sup> | 0.902 | 0.211 | 0.215                      |
| <i>DRD4</i> | 11 |  | rs3758653  | 626399    | G | 0.23 | 0.300                     | 0.752 | 0.249 | 0.980                      |
|             |    |  | rs11246226 | 631191    | A | 0.49 | 0.749                     | 0.748 | 0.166 | 0.925                      |
| <i>DRD5</i> | 4  |  | rs1878943  | 9375986   | A | 0.21 | 0.586                     | 0.686 | 0.482 | 0.386                      |
|             |    |  | rs13106539 | 9406801   | G | 0.39 | 0.735                     | 0.062 | 0.067 | <b>0.044</b> <sup>14</sup> |

<sup>1</sup> Defined by the presence of two out of three possible indicators for the early developmental risk environment: low birth weight, late motor development, and late development of speech.

<sup>2</sup> Defined by the presence of two out of five possible indicators for the social risk environment: unwantedness of pregnancy, low socio-economic status, single parenthood, low level of education of mother, and low activity for information retrieval by the mother.

<sup>3</sup> Minor allele frequency.

<sup>4</sup> P=0.0364 (β=0.0414), <sup>5</sup> P=0.008 (β =0.0440), <sup>6</sup> P=0.042 (β =0.0320) and <sup>7</sup> P=0.022 (β =-0.0396) in individuals with high risk environment; <sup>8</sup> P>0.05 in both genders; <sup>9</sup> P=0.0006 (β=0.023) in males; <sup>10</sup> β=0.008, <sup>11</sup> β=0.012, <sup>12</sup> β=0.011, <sup>13</sup> β=0.022, <sup>14</sup> β=-0.



**Table 3.** Haplotype analysis of *COMT* variants on current depressive symptoms (HSCL score) in individuals with high early developmental risk ( $E_{Dev}$ )<sup>1</sup> from the NFBC 1966. Empirical P-values based on permutation are reported, with P-values <0.05 shown in bold.

| Gene                       | Variant                         | Haplotype | Frequency | Males and females with high risk $E_{Dev}$ |               | Males with high risk $E_{Dev}$ |               | Females with high risk $E_{Dev}$ |        |
|----------------------------|---------------------------------|-----------|-----------|--------------------------------------------|---------------|--------------------------------|---------------|----------------------------------|--------|
|                            |                                 |           |           | Beta                                       | P             | Beta                           | P             | Beta                             | P      |
| <i>COMT</i>                | <i>2-SNP haplotype analysis</i> |           |           |                                            |               |                                |               |                                  |        |
|                            | rs5993883-rs2239393             | CG        | 0.21      | 0.0552                                     | <b>0.0049</b> | 0.0828                         | <b>0.0040</b> | 0.0216                           | 0.4420 |
|                            | rs2239393-rs4680                | GG        | 0.32      | 0.0440                                     | <b>0.0072</b> | 0.0720                         | <b>0.0037</b> | 0.0119                           | 0.4914 |
|                            |                                 | AA        | 0.55      | -0.0320                                    | <b>0.0428</b> | -0.0411                        | 0.0827        | -0.0207                          | 0.3370 |
|                            | rs4680-rs4646316                | GA        | 0.17      | 0.0434                                     | <b>0.0331</b> | 0.0624                         | <b>0.0226</b> | 0.0206                           | 0.3950 |
|                            | <i>3-SNP haplotype analysis</i> |           |           |                                            |               |                                |               |                                  |        |
|                            | rs5993883-rs2239393-rs4680      | CGG       | 0.21      | 0.0548                                     | <b>0.0046</b> | 0.0826                         | <b>0.0053</b> | 0.0211                           | 0.4569 |
| rs2239393-rs4680-rs4646316 | GGA                             | 0.17      | 0.0433    | <b>0.0344</b>                              | 0.0614        | <b>0.0258</b>                  | 0.0213        | 0.4311                           |        |

<sup>1</sup> Defined by the presence of two out of three possible indicators for the early developmental risk environment: low birth weight, late motor development, and late development of speech.

**Table 4.** Haplotype analysis of *DRD2* variants on current depressive symptoms (HSCL score) in the complete sample from the NFBC 1966. Empirical P-values based on permutation are reported, with P-values <0.05 shown in bold.

| Gene                          | Variant                         | Haplotype | Frequency | Males and females |               | Males         |                |
|-------------------------------|---------------------------------|-----------|-----------|-------------------|---------------|---------------|----------------|
|                               |                                 |           |           | Beta              | P             | Beta          | P              |
| <i>DRD2</i>                   | <i>2-SNP haplotype analysis</i> |           |           |                   |               |               |                |
|                               | rs4648318-rs4274224             | GG        | 0.05      | 0.0409            | <b>0.0007</b> | 0.0694        | <b>0.00005</b> |
|                               | rs4274224-rs4581480             | GG        | 0.07      | 0.0220            | <b>0.0069</b> | 0.0321        | <b>0.0023</b>  |
|                               |                                 | AA        | 0.48      | 0.0116            | <b>0.0161</b> | -0.0237       | <b>0.0004</b>  |
|                               | rs4581480-rs7131056             | GA        | 0.07      | 0.0220            | <b>0.0071</b> | 0.0322        | <b>0.0026</b>  |
|                               | <i>3-SNP haplotype analysis</i> |           |           |                   |               |               |                |
|                               | rs4648318-rs4274224-rs4581480   | GGG       | 0.05      | 0.0326            | <b>0.0027</b> | 0.0437        | <b>0.0019</b>  |
| rs4274224-rs4581480-rs7131056 | GGA                             | 0.07      | 0.0215    | <b>0.0081</b>     | 0.0317        | <b>0.0033</b> |                |

**Table 5.** Haplotype analysis of *COMT* and *DRD2* variants on other neurobehavioral traits in the NFBC1966. Empirical P-values based on permutation are reported, with P-values <0.05 shown in bold.

| Gene        | Variant                         | Group     | Gender | HSCL(total) |                | HSCL(depression) |               | HSCL(anxiety) |               | Depression diagnosis |        | Harm avoidance |         |
|-------------|---------------------------------|-----------|--------|-------------|----------------|------------------|---------------|---------------|---------------|----------------------|--------|----------------|---------|
|             |                                 |           |        | Beta        | P              | Beta             | P             | Beta          | P             | Odds ratio           | P      | Beta           | P       |
| <i>COMT</i> | rs737866                        | High risk | Males  | 0.0640      | <b>0.0254</b>  | 0.0440           | 0.2239        | 0.0150        | 0.6157        | 0.7130               | 0.5004 | 0.7820         | 0.3799  |
|             | rs5993883-<br>rs2239393<br>(CG) | High risk | Males  | 0.0830      | <b>0.0040</b>  | 0.0750           | <b>0.0176</b> | 0.0200        | 0.2877        | 0.2100               | 0.1506 | 1.2040         | 0.1433  |
| <i>DRD2</i> | rs4648318-<br>rs4274224<br>(GG) | All       | Males  | 0.0694      | <b>0.00005</b> | 0.0600           | <b>0.0015</b> | 0.0326        | <b>0.0212</b> | 0.8280               | 0.6798 | 1.0430         | 0.07009 |

STROBE 2007 (v4) Statement—Checklist of items that should be included in reports of cohort studies

| Section/Topic                | Item # | Recommendation                                                                                                                                                                       | Reported on page # |
|------------------------------|--------|--------------------------------------------------------------------------------------------------------------------------------------------------------------------------------------|--------------------|
| Title and abstract           | 1      | (a) Indicate the study’s design with a commonly used term in the title or the abstract                                                                                               | 1                  |
|                              |        | (b) Provide in the abstract an informative and balanced summary of what was done and what was found                                                                                  | 3-4                |
| <b>Introduction</b>          |        |                                                                                                                                                                                      |                    |
| Background/rationale         | 2      | Explain the scientific background and rationale for the investigation being reported                                                                                                 | 6-7                |
| Objectives                   | 3      | State specific objectives, including any prespecified hypotheses                                                                                                                     | 7-8                |
| <b>Methods</b>               |        |                                                                                                                                                                                      |                    |
| Study design                 | 4      | Present key elements of study design early in the paper                                                                                                                              | 8                  |
| Setting                      | 5      | Describe the setting, locations, and relevant dates, including periods of recruitment, exposure, follow-up, and data collection                                                      | 8-11               |
| Participants                 | 6      | (a) Give the eligibility criteria, and the sources and methods of selection of participants. Describe methods of follow-up                                                           | 8-11               |
|                              |        | (b) For matched studies, give matching criteria and number of exposed and unexposed                                                                                                  |                    |
| Variables                    | 7      | Clearly define all outcomes, exposures, predictors, potential confounders, and effect modifiers. Give diagnostic criteria, if applicable                                             | 8-11               |
| Data sources/<br>measurement | 8*     | For each variable of interest, give sources of data and details of methods of assessment (measurement). Describe comparability of assessment methods if there is more than one group | 8-11               |
| Bias                         | 9      | Describe any efforts to address potential sources of bias                                                                                                                            | 8-11               |
| Study size                   | 10     | Explain how the study size was arrived at                                                                                                                                            | 8-11               |
| Quantitative variables       | 11     | Explain how quantitative variables were handled in the analyses. If applicable, describe which groupings were chosen and why                                                         | 12-13              |
| Statistical methods          | 12     | (a) Describe all statistical methods, including those used to control for confounding                                                                                                | 12-13              |
|                              |        | (b) Describe any methods used to examine subgroups and interactions                                                                                                                  | 12-13              |
|                              |        | (c) Explain how missing data were addressed                                                                                                                                          |                    |
|                              |        | (d) If applicable, explain how loss to follow-up was addressed                                                                                                                       |                    |
|                              |        | (e) Describe any sensitivity analyses                                                                                                                                                |                    |
| <b>Results</b>               |        |                                                                                                                                                                                      |                    |

|                          |     |                                                                                                                                                                                                              |           |
|--------------------------|-----|--------------------------------------------------------------------------------------------------------------------------------------------------------------------------------------------------------------|-----------|
| Participants             | 13* | (a) Report numbers of individuals at each stage of study—eg numbers potentially eligible, examined for eligibility, confirmed eligible, included in the study, completing follow-up, and analysed            | 8-11      |
|                          |     | (b) Give reasons for non-participation at each stage                                                                                                                                                         | 8-11      |
|                          |     | (c) Consider use of a flow diagram                                                                                                                                                                           |           |
| Descriptive data         | 14* | (a) Give characteristics of study participants (eg demographic, clinical, social) and information on exposures and potential confounders                                                                     | 8-11      |
|                          |     | (b) Indicate number of participants with missing data for each variable of interest                                                                                                                          | 8-11      |
|                          |     | (c) Summarise follow-up time (eg, average and total amount)                                                                                                                                                  | 8-11      |
| Outcome data             | 15* | Report numbers of outcome events or summary measures over time                                                                                                                                               | 8-13      |
| Main results             | 16  | (a) Give unadjusted estimates and, if applicable, confounder-adjusted estimates and their precision (eg, 95% confidence interval). Make clear which confounders were adjusted for and why they were included | 13-18     |
|                          |     | (b) Report category boundaries when continuous variables were categorized                                                                                                                                    |           |
|                          |     | (c) If relevant, consider translating estimates of relative risk into absolute risk for a meaningful time period                                                                                             |           |
| Other analyses           | 17  | Report other analyses done—eg analyses of subgroups and interactions, and sensitivity analyses                                                                                                               | 13-18     |
| <b>Discussion</b>        |     |                                                                                                                                                                                                              |           |
| Key results              | 18  | Summarise key results with reference to study objectives                                                                                                                                                     | 18-22, 24 |
| <b>Limitations</b>       |     |                                                                                                                                                                                                              |           |
| Interpretation           | 20  | Give a cautious overall interpretation of results considering objectives, limitations, multiplicity of analyses, results from similar studies, and other relevant evidence                                   | 22-24     |
| Generalisability         | 21  | Discuss the generalisability (external validity) of the study results                                                                                                                                        | 24        |
| <b>Other information</b> |     |                                                                                                                                                                                                              |           |
| Funding                  | 22  | Give the source of funding and the role of the funders for the present study and, if applicable, for the original study on which the present article is based                                                | 24-25     |

\*Give information separately for cases and controls in case-control studies and, if applicable, for exposed and unexposed groups in cohort and cross-sectional studies.

**Note:** An Explanation and Elaboration article discusses each checklist item and gives methodological background and published examples of transparent reporting. The STROBE checklist is best used in conjunction with this article (freely available on the Web sites of PLoS Medicine at <http://www.plosmedicine.org/>, Annals of Internal Medicine at <http://www.annals.org/>, and Epidemiology at <http://www.epidem.com/>). Information on the STROBE Initiative is available at [www.strobe-statement.org](http://www.strobe-statement.org).

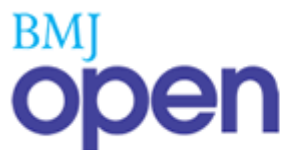

**Interaction of Early Environment, Gender and Genes of Monoamine Neurotransmission in the Etiology of Depression in a Large Population-Based Finnish Birth Cohort**

|                               |                                                                                                                                                                                                                                                                                                                                                                                                                                                                                                                                                                                                                                                                                                                                                                                                                                                                                                                                                                                                                                                                                                                                                                                                                                                                                                                                                                                                                                                                                                                                                                                                                                                                                                                                                                                                                                                                                                     |
|-------------------------------|-----------------------------------------------------------------------------------------------------------------------------------------------------------------------------------------------------------------------------------------------------------------------------------------------------------------------------------------------------------------------------------------------------------------------------------------------------------------------------------------------------------------------------------------------------------------------------------------------------------------------------------------------------------------------------------------------------------------------------------------------------------------------------------------------------------------------------------------------------------------------------------------------------------------------------------------------------------------------------------------------------------------------------------------------------------------------------------------------------------------------------------------------------------------------------------------------------------------------------------------------------------------------------------------------------------------------------------------------------------------------------------------------------------------------------------------------------------------------------------------------------------------------------------------------------------------------------------------------------------------------------------------------------------------------------------------------------------------------------------------------------------------------------------------------------------------------------------------------------------------------------------------------------|
| Journal:                      | <i>BMJ Open</i>                                                                                                                                                                                                                                                                                                                                                                                                                                                                                                                                                                                                                                                                                                                                                                                                                                                                                                                                                                                                                                                                                                                                                                                                                                                                                                                                                                                                                                                                                                                                                                                                                                                                                                                                                                                                                                                                                     |
| Manuscript ID:                | bmjopen-2011-000087.R1                                                                                                                                                                                                                                                                                                                                                                                                                                                                                                                                                                                                                                                                                                                                                                                                                                                                                                                                                                                                                                                                                                                                                                                                                                                                                                                                                                                                                                                                                                                                                                                                                                                                                                                                                                                                                                                                              |
| Article Type:                 | Research                                                                                                                                                                                                                                                                                                                                                                                                                                                                                                                                                                                                                                                                                                                                                                                                                                                                                                                                                                                                                                                                                                                                                                                                                                                                                                                                                                                                                                                                                                                                                                                                                                                                                                                                                                                                                                                                                            |
| Date Submitted by the Author: | 11-May-2011                                                                                                                                                                                                                                                                                                                                                                                                                                                                                                                                                                                                                                                                                                                                                                                                                                                                                                                                                                                                                                                                                                                                                                                                                                                                                                                                                                                                                                                                                                                                                                                                                                                                                                                                                                                                                                                                                         |
| Complete List of Authors:     | <p>Nyman, Emma; Institute for Molecular Medicine Finland FIMM, University of Helsinki and National Institute for Health and Welfare, Public Health Genomics Unit</p> <p>Sulkava, Sonja; Institute for Molecular Medicine Finland FIMM, University of Helsinki and National Institute for Health and Welfare, Public Health Genomics Unit; Helsinki University Central Hospital, Department of Psychiatry</p> <p>Soronen, Pia; Institute for Molecular Medicine Finland FIMM, University of Helsinki and National Institute for Health and Welfare, Public Health Genomics Unit</p> <p>Miettunen, Jouko; Department of Psychiatry, University of Oulu and Oulu University Hospital, Oulu; Academy of Finland</p> <p>Loukola, Anu; Institute for Molecular Medicine Finland FIMM, University of Helsinki and National Institute for Health and Welfare, Public Health Genomics Unit</p> <p>Leppä, Virpi; University of Helsinki, Institute for Molecular Medicine Finland (FIMM); University of Helsinki, Helsinki Biomedical Graduate School</p> <p>Joukamaa, Matti; University of Tampere, Tampere School of Public Health</p> <p>Mäki, Pirjo; University of Oulu and Oulu University Hospital, Department of Psychiatry</p> <p>Järvelin, Marjo-Riitta; Institute of Health Sciences, University of Oulu</p> <p>Freimer, Nelson; University of California, Los Angeles, Semel Institute for Neuroscience and Human Behavior</p> <p>Peltonen, Leena; Institute for Molecular Medicine Finland FIMM, University of Helsinki and National Institute for Health and Welfare, Public Health Genomics Unit</p> <p>Veijola, Juha; University of Oulu and Oulu University Hospital, Department of Psychiatry; Academy of Finland</p> <p>Paunio, Tiina; Institute for Molecular Medicine Finland FIMM, University of Helsinki and National Institute for Health and Welfare, Public Health Genomics Unit</p> |

1  
2  
3  
4  
5  
6  
7  
8  
9  
10  
11  
12  
13  
14  
15  
16  
17  
18  
19  
20  
21  
22  
23  
24  
25  
26  
27  
28  
29  
30  
31  
32  
33  
34  
35  
36  
37  
38  
39  
40  
41  
42  
43  
44  
45  
46  
47  
48  
49  
50  
51  
52  
53  
54  
55  
56  
57  
58  
59  
60

|           |                                                                |
|-----------|----------------------------------------------------------------|
| Keywords: | PSYCHIATRY, Depression & mood disorders < PSYCHIATRY, GENETICS |
|-----------|----------------------------------------------------------------|

SCHOLARONE™  
Manuscripts

For peer review only

# Interaction of Early Environment, Gender and Genes of Monoamine Neurotransmission in the Etiology of Depression in a Large Population-Based Finnish Birth Cohort

Emma S. Nyman, M.Sc.,<sup>1,2</sup> Sonja Sulkava,<sup>1,3</sup> Pia Soronen, M.Sc.,<sup>1</sup>  
Jouko Miettunen, Ph.D.,<sup>4,5</sup> Anu Loukola, Ph.D.,<sup>1</sup> Virpi Leppä, M.Sc.,<sup>1,2</sup>  
Matti Joukamaa, M.D., Ph.D.,<sup>6,7</sup> Pirjo Mäki, M.D., Ph.D.,<sup>4</sup> Marjo-Riitta  
Järvelin, M.D., Ph.D.,<sup>8,9,10</sup> Nelson Freimer, M.D.,<sup>11</sup> Leena Peltonen,  
M.D., Ph.D.<sup>1,2,12,13</sup> Juha Veijola, MD, Ph.D.,<sup>4,5</sup> Tiina Paunio M.D.,  
Ph.D.,<sup>1,3 \*</sup>

<sup>1</sup> Public Health Genomics Unit, Institute for Molecular Medicine Finland FIMM, University of Helsinki and National Institute for Health and Welfare, Helsinki, Finland

<sup>2</sup> Department of Medical Genetics, University of Helsinki, Helsinki, Finland

<sup>3</sup> Department of Psychiatry, Helsinki University Central Hospital, Helsinki, Finland

<sup>4</sup> Department of Psychiatry, University of Oulu and Oulu University Hospital, Oulu, Finland

<sup>5</sup> Academy of Finland, Helsinki, Finland



1  
2  
3 <sup>6</sup> Tampere School of Public Health, University of Tampere, Tampere, Finland

4  
5  
6 <sup>7</sup> Department of Psychiatry, Tampere University Hospital, Tampere, Finland

7  
8 <sup>8</sup> Institute of Health Sciences, University of Oulu, Oulu, Finland

9  
10 <sup>9</sup> Department of Epidemiology and Public Health, Imperial College, London, UK

11  
12  
13 <sup>10</sup> Department of Child and Adolescent Health, National Public Health Institute,  
14 Helsinki, Finland

15  
16  
17 <sup>11</sup> Semel Institute for Neuroscience and Human Behavior, University of California,  
18 Los Angeles, CA, USA

19  
20  
21  
22 <sup>12</sup> Program in Medical and Population Genetics, The Broad Institute of MIT and  
23 Harvard, Cambridge, MA, USA

24  
25  
26  
27 <sup>13</sup> Wellcome Trust Sanger Institute, Cambridge, UK

28  
29  
30  
31  
32 \* Correspondence and reprint requests: Dr. Tiina Paunio, Institute for Molecular  
33 Medicine Finland FIMM, University of Helsinki and National Institute for Health  
34 and Welfare, P.O.Box 212, FI-00251 Helsinki, Finland. Tel: +358 (0)50 350 7936,  
35 and Welfare, P.O.Box 212, FI-00251 Helsinki, Finland. Tel: +358 (0)50 350 7936,  
36 Fax: +358 (0)20 610 8480 Helsinki, Email: tiina.paunio@thl.fi.  
37  
38  
39  
40  
41  
42

43  
44 Key words: Environment, Monoamine, Gene, Depression, Cohort Study

45  
46  
47  
48 Word count text: 4333

49  
50 Word count abstract: 236

## ABSTRACT

**Objectives** Depression is a worldwide leading cause of morbidity and disability. Genetic studies have recently begun to elucidate its molecular etiology. We investigated candidate genes of monoamine neurotransmission and early environmental risk factors for depressiveness in the genetically isolated population-based Northern Finland Birth Cohort 1966 (12058 live births).

**Design** We ascertained and subdivided the study sample (n=5225) based on early developmental and social risk environments and examined candidate genes of monoamine neurotransmission, many of which have shown prior evidence of gene-environment interaction (GxE) for affective disorders, namely *SLC6A4*, *TPH2*, *COMT*, *MAOA*, and the dopamine receptor genes *DRD1-DRD5*.

**Results and Conclusion** We observed no major genetic effects of the analyzed variants on depressiveness. However, when specific environmental factors were considered, some evidence of interaction was observed. Allelic variants of *COMT* interacted with high early developmental risk environment (P=0.005 for rs2239393 and P=0.02 for rs4680) so that the association with depression was detected only in individuals of high developmental risk group (P=0.0046 and  $\beta=0.056$  for rs5993883-rs2239393-rs4680 risk haplotype CGG including Val158), particularly in males (P=0.0053 and  $\beta=0.083$  for the haplotype CGG). Rs4274224 from *DRD2* interacted with gender (P=0.017) showing significant association with depressiveness in males (P=0.0006 and  $\beta=0.0023$ ; P=0.00005 and  $\beta=0.069$  for rs4648318-rs4274224 haplotype GG). Our results support the role of genes of

1  
2  
3 monoamine neurotransmission in the etiology of depression conditional on  
4 environmental risk and sex, but not direct major effects of monoaminergic genes  
5  
6  
7  
8 in this unselected population.  
9

## 10 11 12 13 14 **ARTICLE SUMMARY**

### 15 16 17 18 **Article focus**

- 19  
20  
21 - Impact on depression of monoaminergic candidate genes with prior  
22 evidence of gene-environment interaction for affective disorders, and of  
23 dopamine receptor genes  
24  
25  
26  
27
- 28  
29 - Gene-environment and gene-gender interaction in the etiology of  
30 depression  
31  
32
- 33  
34 - Effect of early neurodevelopmental and social risk environments on  
35 depression  
36  
37

### 38 39 **Key messages**

- 40  
41 - Genes of monoamine neurotransmission play a role in the etiology of  
42 depression conditional on environmental risk, especially in males and in  
43 individuals from an early developmental risk environment; in particular  
44 there is evidence of an Interaction with a *COMT* high risk haplotype  
45 including Val158  
46  
47  
48
- 49  
50 - Gender-specific mechanisms and responses to environmental effectors  
51 are evident in regulation of mood  
52  
53  
54  
55  
56  
57  
58  
59  
60

**Strengths and limitations of this study** Depression as defined does not necessary imply clinical diagnosis of major depression, but instead is based on self-report or on the score from the HSCL measure. Despite this limitation, the prevalence of depressed mood was in the same range as in earlier reports. There was a notable drop-out rate among the original material of all cohort members, and about half of the original cohort members did not participate in this study. Markers of early developmental and social environments were chosen to reflect risk as precisely as possible, however, the choice was limited by the availability of variables collected. Advantages of this study include the availability of longitudinal follow-up data starting antenatally, enabling inclusion of the environmental dimension without risk of recall bias. Another advantage is the unique genetic structure of the study cohort, characterized by isolation, founder effect, multiple bottlenecks and more genetic homogeneity compared to many other isolates, permitting identification of genetic risk loci that may be missed when using more heterogeneous populations. The subjects were also representative of the population, with all cohort members born in the same year and within a geographically defined area. The size of the study sample is sufficient for identifying genetic variants of moderate impact. Both genders are also represented in almost equal amounts, which is notable since gender differences are evident in both depression and related temperament traits, such as Harm avoidance. It is also beneficial that the sample is a one-year birth cohort, as it is well established that some psychiatric traits, such as Harm avoidance are age-dependent. The genetic effects may therefore be isolated

1  
2  
3  
4  
5  
6  
7  
8  
9  
10  
11  
12  
13  
14  
15  
16  
17  
18  
19  
20  
21  
22  
23  
24  
25  
26  
27  
28  
29  
30  
31  
32  
33  
34  
35  
36  
37  
38  
39  
40  
41  
42  
43  
44  
45  
46  
47  
48  
49  
50  
51  
52  
53  
54  
55  
56  
57  
58  
59  
60

from the effects of aging. Finally, a complete coverage of the major candidate genes that are relevant with the present focus is provided.

For peer review only

## INTRODUCTION

Depression is a major cause of morbidity worldwide, major depression affecting 5-7% of the population annually and 16% over the lifetime.[1] Although a genetic component in the etiology of major depression is evident with a 40-50% heritability,[2] the predisposing genetic background has so far remained largely undefined, and recent findings from genome-wide association studies also point to a complex underlying architecture.[3] Depressed patients frequently exhibit comorbidities such as anxiety and alcohol abuse,[4] and certain personality types[5-7] have been associated with depression proneness.

Environmental risk factors, in particular stressors influencing during development,[8] are considered to have a significant impact on the development and course of depression. It is likely that many of the genetic risk factors for depression interact with the early developmental environment, but recapture of these interactions has remained a challenge for etiological studies of depression. Although the interplay between genes and environment has been investigated with respect to several psychiatric disorders[9, 10] including depression, this vast subject remains still to a large extent unexplored. On the other hand, addressing the effects of genes and environment on psychiatric morbidity enables us to examine the two main constituents in their etiology. Therefore, we wanted to include the environmental dimension in our study in order to also explore gene-environment interactions (GxE).

1  
2  
3  
4  
5  
6  
7 According to the monoamine hypothesis, depression is caused by underactivity  
8  
9 in brain monoamines, such as dopamine, serotonin, and norepinephrine.[11]  
10  
11 Recent results of neuroimaging studies have provided further support for this  
12  
13 theory.[12] The most solid evidence from candidate gene studies has perhaps  
14  
15 been obtained for the interaction of the *SLC6A4* gene for serotonin transporter  
16  
17 and stressful early and current life events,[13] including positive results from a  
18  
19 recent review[14] and meta-analysis of all studies to date[15], although there are  
20  
21 also contradicting results.[16] Other robust genetic findings have been obtained  
22  
23 on the *COMT* gene for catechol-O-methyltransferase, an enzyme catabolising  
24  
25 catecholamines such as dopamine and noradrenaline, which has been implicated  
26  
27 in depression in conjunction with stress,[17] and on the *MAOA* gene for  
28  
29 monoamine oxidase A, an enzyme oxidizing neurotransmitter and dietary  
30  
31 monoamines such as serotonin, noradrenaline and dopamine, which has been  
32  
33 associated with depression in interaction with severity of maltreatment in  
34  
35 childhood.[17] Furthermore, *TPH2* gene for tryptophan hydroxylase 2, which is  
36  
37 the brain-specific form of the key enzyme in serotonin synthesis, has been  
38  
39 implicated to interact with stress on disorders of cognitive control and emotional  
40  
41 regulation, including depression.[18] Within the dopamine transmission the *DRD2*  
42  
43 gene for dopamine receptor D2 has been associated with depressiveness and  
44  
45 anxiety, combined with an effect of parenting in childhood,[19] and the *DRD4*  
46  
47 gene for dopamine receptor D4 has been associated with increased risk for  
48  
49 obesity in women with seasonal affective disorder.[20] Thus, genes from the  
50  
51  
52  
53  
54  
55  
56  
57  
58  
59  
60

1  
2  
3 monoamine neurotransmission system are among the most thoroughly studied in  
4  
5 psychiatric genetics and in particular in the etiology of mood disorders, and have  
6  
7 provided perhaps the most robust evidence so far for interaction with various  
8  
9 types of risk environments, including childhood environment.  
10  
11

12  
13  
14  
15  
16  
17 We chose to include these candidate genes of monoamine neurotransmission,  
18  
19 including *SLC6A4*, *TPH2*, *COMT*, *MAOA*, as well as the dopamine receptor  
20  
21 genes *DRD1-DRD5*, in our study on the etiology of depression with a particular  
22  
23 focus on their interaction with available markers reflecting early developmental  
24  
25 and social risk environments. The study was performed in a sample of 5225  
26  
27 individuals from a large Finnish isolated population cohort. As gender is an  
28  
29 important confounder for depression and at least some of the genetic liability is  
30  
31 gender-specific,[2] we also examined gene-gender interactions in this sample.  
32  
33  
34  
35  
36  
37  
38  
39  
40

## 41 **METHODS**

### 42 43 44 45 **Setting**

46  
47  
48  
49  
50 We utilized the genetically isolated Northern Finland Birth Cohort (NFBC 1966) to  
51  
52 investigate effects of candidate genes and environmental risk factors during the  
53  
54 development on depressiveness. We subdivided the study sample based on  
55  
56  
57  
58  
59  
60



1  
2  
3 developmental risk factors arising from the fetal growth environment and  
4  
5 neurological development during the first year of life (early developmental risk  
6  
7 environment) as well as from the family environment during pregnancy and early  
8  
9 childhood (social risk environment). We examined interactions of these  
10  
11 environments with candidate genes of the monoamine neurotransmitter systems,  
12  
13 many of which have prior evidence of gene-environment interaction on affective  
14  
15 disorders, namely *SLC6A4*, *TPH2*, *COMT*, *MAOA*, and the dopamine receptor  
16  
17 genes *DRD1-DRD5*.  
18  
19  
20  
21  
22  
23

### 24 **Study subjects**

25  
26  
27  
28  
29  
30 The Northern Finland Birth Cohort 1966 (NFBC 1966) is a longitudinal one-year  
31  
32 birth cohort from an unselected population (N=12058 live births) comprising  
33  
34 inhabitants of the two northernmost provinces of Finland.[21] Data collection was  
35  
36 begun during the antenatal period, and follow-up studies have been performed at  
37  
38 the ages of 1, 14 and 31 years. The cohort study has been approved by the  
39  
40 Ethical Committee of Oulu University Faculty of Medicine, and written informed  
41  
42 consent has been obtained from all participants.  
43  
44  
45  
46  
47  
48

49  
50 In 1997 for the 31-year follow-up study[22] all alive cohort members with a known  
51  
52 address (N=11540) were sent a postal questionnaire surveying lifestyle, social  
53  
54 status and health (76% participated), including the Hopkins Symptom Check  
55  
56 List-25 (HSCL)[23] and items on self-reported lifetime depression diagnosis (e.g.  
57  
58  
59  
60

1  
2  
3 “Has your doctor ever diagnosed a depressive disorder?”). Additionally, cohort  
4 members who lived in Northern Finland or had moved to the Helsinki area  
5 (N=8465) were invited to a clinical examination (71% participated) with another  
6 questionnaire to be filled in later and sent to the research group (61%  
7 participated).[24] It included, among others, a validated Finnish translation of  
8 Cloninger’s Temperament and Character Inventory (TCI) questionnaire.[25]  
9  
10  
11  
12  
13  
14  
15  
16  
17  
18  
19

20 Current depressive symptoms were assessed by the HSCL-questionnaire,[26] a  
21 25-item shortened version of an originally 90-item questionnaire. HSCL contains  
22 13-item depression and 10-item anxiety subscales assessing presence and  
23 intensity of depressive and anxiety symptoms during the previous week. Answers  
24 are scored on a scale from 1 (not bothered) to 4 (extremely bothered). The HSCL  
25 total score is the sum of items divided by the number of items answered. We  
26 used mainly HSCL total score as symptoms of depression and anxiety are known  
27 to overlap significantly. In the post hoc analyses, in order to better understand  
28 the original association signals, the separate HSCL subscales for depressive and  
29 anxiety symptoms were also taken into consideration. In addition to current  
30 depressive symptoms (HSCL score) and lifetime (diagnosed) depression, we  
31 used the TCI temperament trait Harm avoidance[5-7] and its subcomponents as  
32 a measure of proneness to depression.  
33  
34  
35  
36  
37  
38  
39  
40  
41  
42  
43  
44  
45  
46  
47  
48  
49  
50

51  
52  
53 The subjects (n=5225; 2509 males, 2716 females; 45 % of the 31 year follow-up  
54 study sample or 43% of the original study sample) were divided into high and low  
55  
56  
57  
58  
59  
60

1  
2  
3 risk groups based on the available information reflecting early  
4 neurodevelopmental and social risk environments (Table 1). The markers for the  
5 *early developmental risk environment* included 1) low birth weight (<2500 g),[21]  
6 considered to reflect suboptimal growth environment during fetal life and to  
7 increase risk for somatic and psychiatric diseases such as depression in  
8 adulthood,[27] 2) late motor development as reflected by first standing later than  
9 at the age of 10 months,[28] and 3) late development of speech, defined by no  
10 words at the age of one year.[28] If two out of these risk indicators were present,  
11 the subject was classified as having experienced a high risk environment for  
12 early brain development. The markers for the *social risk environment* included  
13 the occurrence of two or more of the following five indicators for high risk social  
14 environment during pregnancy and early childhood: 1) unwantedness of  
15 pregnancy (rated by mothers of the cohort members at the sixth or seventh  
16 month of pregnancy),[29] 2) low socio-economic status, shown to be linked with  
17 depression in the offspring in earlier studies,[30] as defined by father's social  
18 class at birth (no occupation, unskilled worker, or farmer with area under  
19 cultivation under 8 hectares), 3) single parenthood at birth, 4) low level of  
20 education of mother (less than nine years of primary school), and 5) low level of  
21 information retrieval by the mother related to pregnancy and child care. There  
22 was no significant drop-out in either of the high risk groups, as 43% and 41% of  
23 the individuals with high risk early developmental and social environments, and  
24 47% and 46% of those with the respective low risk environments, were available  
25 for study.  
26  
27  
28  
29  
30  
31  
32  
33  
34  
35  
36  
37  
38  
39  
40  
41  
42  
43  
44  
45  
46  
47  
48  
49  
50  
51  
52  
53  
54  
55  
56  
57  
58  
59  
60

1  
2  
3  
4  
5  
6 [Insert Table 1]  
7  
8  
9

## 10 **Genotyping methods**

11  
12  
13  
14  
15 We investigated genes relevant within the context of the monoamine hypothesis  
16 of depression: *SLC6A4*, *TPH2*, *COMT*, *MAOA*, and the dopamine receptor genes  
17 *DRD1-DRD5* (Table 2). The genotyping was performed at the Broad Institute  
18 (Cambridge, MA, USA) on the HumanCNV370-duo chip (Illumina, San Diego, CA  
19 USA) platform according to the manufacturer's instructions. The analysed SNPs  
20 included HapMap tag SNPs (<http://www.hapmap.org/index.html.en>) and were  
21 relatively evenly spaced to cover the genes and flanking regions.  
22  
23  
24  
25  
26  
27  
28  
29  
30  
31  
32  
33

34 [Insert Table 2]  
35  
36  
37  
38

## 39 **Statistical analysis**

40  
41  
42  
43 LD structures were determined using HAPLOVIEW. Interaction and  
44 association/correlation analyses using linear and logistic regression with  
45 permutation was performed using PLINK Software Package Version 1.04, in a  
46 step-wise manner to maximize our ability to detect associations and to minimize  
47 multiple testing. (i) Primarily analyses were performed to identify genetic risk  
48 variants for current depressive symptoms (HSCL score) interacting with early  
49  
50  
51  
52  
53  
54  
55  
56  
57  
58  
59  
60

1  
2  
3 developmental risk ( $G \times E_{Dev}$ ) and social risk ( $G \times E_{Soc}$ ) environments. For variants  
4 giving significant evidence of interaction, we also performed analyses separately  
5 in subgroups of high and low risk, respectively. As gender is an important  
6 confounder for depression and at least some of the genetic liability is gender-  
7 specific,[2] we also examined gene-gender interactions ( $G \times Sex$ ). For variants  
8 showing significant evidence of gene-gender interaction, we also performed  
9 analyses separately in males and females. In order to achieve a more complete  
10 view of the effects of the examined genes on depressive symptoms in the cohort,  
11 we also examined their influence on the gender-adjusted HSCL score in the  
12 complete sample regardless of environmental effectors. Finally, we tested for  
13 gene-environment correlations ( $r_{GE_{Dev}}$  and  $r_{G_{Soc}}$ ) and associations of the risk  
14 environments with the HSCL score (PASW Statistics 18, linear regression  
15 model). (ii) Haplotype analyses were performed when two SNPs located at  
16 physically close vicinity had given association signals of  $P < 0.05$  when analyzed  
17 separately. (iii) Genetic variants and haplotypes which had been identified in the  
18 previous analyses were analyzed post hoc with respect to HSCL subscales  
19 (depressive and anxiety symptoms), depression diagnosis and TCI temperament  
20 Harm avoidance. We report point-wise empirical p-values generated by PLINK's  
21 max(T) permutation (10 000 permutations) throughout the manuscript, and  
22 explicitly state where corrected empirical p-values are reported. SNPs with  
23 Hardy-Weinberg Equilibrium p-values  $< 0.05$  were excluded from all analyses.  
24  
25  
26  
27  
28  
29  
30  
31  
32  
33  
34  
35  
36  
37  
38  
39  
40  
41  
42  
43  
44  
45  
46  
47  
48  
49  
50  
51  
52  
53  
54  
55  
56  
57  
58  
59  
60

## RESULTS

### Gene-environment and gene-gender interaction and association analyses in relation to the HSCL score

We examined the effects of nine candidate genes of monoamine neurotransmission on current depressive symptoms (HSCL score) in a longitudinal population-based NFBC 1966 cohort. In particular, we searched for evidence of interaction of variants in these genes with two early growth environments, one with indicators for potentially disturbed neurobehavioral development (early developmental risk environment) and the other with risk factors from social environment for normal emotional development (social risk environment). The results are presented in Table 2 in which nominal P-values are reported.

Out of the 69 genetic variants examined, none gave a statistically significant association signal with depressiveness or for an interaction with early developmental or social risk environments, which would survive correction for multiple testing. We observed nominal evidence for association with the HSCL score ( $P < 0.05$ ) in the complete sample in the cases of rs1487275 in *TPH2*, ( $P = 0.049$ ,  $\beta = 0.008$ ), rs4646316 in *COMT* ( $P = 0.026$ ,  $\beta = 0.012$ ), rs4274224 and rs4581480 in *DRD2* ( $P = 0.022$ ,  $\beta = 0.011$ ; and  $P = 0.009$ ,  $\beta = 0.022$ , respectively), and rs13106539 in *DRD5* ( $P = 0.044$ ,  $\beta = -0.008$ ). Three variants of *COMT* and one

1  
2  
3 of *DRD3* showed some evidence of interaction ( $P < 0.05$ ) with high early  
4 developmental risk environments with respect to the HSCL score ( $P = 0.028$  for  
5 *rs737866*;  $P = 0.005$  for *rs2239393*, and,  $P = 0.020$  from *rs4680* from *COMT*, and  
6 *rs9825563*,  $P = 0.045$  from *DRD3*). All of them were associated with the HSCL  
7 score in individuals of the high risk group ( $P = 0.036$ ,  $\beta = 0.0414$  for *rs737866*;  
8  $P = 0.008$ ,  $\beta = 0.0440$  for *rs2239393*;  $P = 0.042$ ,  $\beta = 0.0320$  for *rs4680*; and  $P = 0.022$ ,  
9  $\beta = -0.0396$  for *rs9825563*, respectively). None of the variants gave any evidence  
10 of interaction with the social risk environment in relation to the HSCL score. Five  
11 of the genetic variants showed some evidence of interaction with gender  
12 ( $P < 0.05$ ), including *rs737866* and *rs5993883* in *COMT* and *rs4274224* in *DRD2*.  
13 Out of these, only *rs4274224* associated at  $P < 0.05$  with one of the genders  
14 ( $P = 0.0006$ ,  $\beta = 0.023$  in males). The evidence for gene-environment correlations  
15 (rGE) was observed only nominally about *rs1906451* from *TPH2* ( $P = 0.035$ ),  
16 *rs265973* from *DRD1* ( $P = 0.047$ ), and *rs9825563* from *DRD3* ( $P = 0.028$ ). Despite  
17 a priori evidence for the role of the markers which indicate a developmental high  
18 risk environment for psychiatric health and wellbeing, namely low birth weight[21,  
19 27] and late motor or verbal development[28], there was no correlation between  
20 these markers and the HSCL score in the present sample ( $P = 0.131$ ), whereas  
21 the social high risk environment, correlated significantly with the score ( $P =$   
22  $0.00001$ ).

23  
24  
25  
26  
27  
28  
29  
30  
31  
32  
33  
34  
35  
36  
37  
38  
39  
40  
41  
42  
43  
44  
45  
46  
47  
48  
49  
50  
51  
52  
53 Although none of the association findings of these primary analyses survived  
54 correction for multiple testing, post hoc association analyses in gender groups  
55  
56  
57  
58  
59  
60

led to a finding close to statistical significance even when taking into account the amount of multiple testing performed ( $P=0.0006$  for males with rs4274224 in *DRD2*). Furthermore, as there was an accumulation of association signals within two highly plausible candidate genes, *DRD2* and *COMT*, we proceeded to perform haplotype analyses on these genes in order to better characterize the allelic variants which yielded the observed suggestive associations.

### **Haplotype analysis of *COMT* and *DRD2* variants in relation to the HSCL score**

We performed 2-SNP and 3-SNP haplotype analyses combining rs2239393 and rs4680 from *COMT* and their neighbouring variants using the sliding window approach. Evidence of association was observed for the rs5993883-rs2239393 haplotype CG spanning a region from the space between LD blocks 1 and 2 to block 2 of *COMT* (Supplementary figure 1) ( $P=0.0049$ ,  $\beta=0.055$ ), for the rs2239393-rs4680 haplotype GG in block 2 ( $P=0.0072$ ,  $\beta=0.044$ ), and the rs5993883-rs2239393-rs4680 haplotype CGG ( $P=0.0046$ ,  $\beta=0.055$ ) in high early developmental risk individuals, in agreement with analyses using single variants (Table 3). As rs5993883 from the haplotype had also given evidence of interaction with gender (Table 2), we further examined haplotype association in males and females of the high risk group separately. We found that the haplotypes increased the risk for depressive symptoms in males, but not in females ( $P=0.004$ ,  $\beta=0.083$  for rs5993883-rs2239393 haplotype CG;  $P=0.0037$ ,



1  
2  
3  $\beta=0.072$  for rs2239393-rs4680 haplotype GG; and  $P=0.0053$ ,  $\beta=0.083$  for  
4  
5  
6 rs5993883-rs2239393-rs4680 haplotype CGG) (Table 3).  
7  
8  
9

10 Haplotype analysis of rs4274224 and rs4581480 from *DRD2*, which gave  
11  
12 suggestive evidence of an association with the HSCCL score in the complete  
13  
14 sample, and of their neighbouring variants gave evidence of an association of  
15  
16 rs4648318-rs4274224 haplotype GG spanning from block 2 to block 3 of *DRD2*  
17  
18 ( $P=0.0007$ ,  $\beta=0.041$ ), rs4274224-rs4581480 haplotype GG in block 3 ( $P=0.0069$ ,  
19  
20  $\beta=0.022$ ), and rs4581480-rs7131056 haplotype GA spanning from block 3 to  
21  
22 block 4 ( $P=0.0071$ ,  $\beta=0.022$ ) with the HSCCL score. The 3-SNP haplotypes  
23  
24 rs4648318-rs4274224-rs4581480 haplotype GGG ( $P=0.0027$ ,  $\beta=0.032$ ), and  
25  
26 rs4274224-rs4581480-rs7131056 haplotype GGA ( $P=0.0081$ ,  $\beta=0.021$ ), gave  
27  
28 evidence of an association in agreement with the findings from the 2-SNP  
29  
30 haplotypes as well as the single variants (Table 4). As one of the variants  
31  
32 contained within these haplotypes, namely rs4274224, also gave evidence of  
33  
34 interaction with gender as well as association with the HSCCL score in males, we  
35  
36 also examined the association in males alone. The association signal became  
37  
38 stronger for all of the risk haplotypes, being strongest for rs4648318-rs4274224  
39  
40 haplotype GG ( $P=0.00005$ ,  $\beta=0.069$ ).  
41  
42  
43  
44  
45  
46  
47  
48  
49  
50

51 [Insert Tables 3, 4 and Supplementary figure 1 into the supplementary]  
52  
53  
54  
55  
56  
57  
58  
59  
60

## Haplotype analysis of *COMT* and *DRD2* variants in relation to other neurobehavioral traits

Encouraged by the findings of the haplotype analyses, we tested for associations of haplotypes rs5993883-rs2239393 in *COMT* and rs4648318-rs4274224 in *DRD2*, as well as the single variant rs737866 in *COMT* with other traits related to depression, including the HSCL depression and anxiety subscales, depression diagnosis and TCI temperament trait Harm avoidance (Table 5). In both of the genes, it is evident that the association with HSCL stems mainly from the subscale which reflects symptoms of depression and not that reflecting anxiety (with HSCL depression subscale,  $P=0.018$ ,  $\beta=0.075$  for *COMT* haplotype CG and  $P=0.0015$ ,  $\beta=0.060$  for *DRD2* haplotype GG; with HSCL anxiety subscale,  $P=0.288$ ,  $\beta=0.02$  and  $P=0.02$  and  $\beta=0.033$ , respectively). We did not detect any evidence of an association with depression diagnosis or with Harm avoidance or its subcomponents.

[Insert Table 5]

## DISCUSSION

We investigated genetic and environmental risk factors for depression in a genetically isolated Finnish birth cohort by assessing the relative impacts of

1  
2  
3 monoaminergic candidate genes for depression in environments of contrasting  
4 (high and low) early developmental and social risk. We did not observe any  
5 robust genetic effects of the analyzed variants on depressiveness. However,  
6 when specific environmental factors were considered, some signals for  
7 association were observed, although none of them survive correction for multiple  
8 testing. Our study sample provided evidence of an interaction of *COMT* with the  
9 high early developmental risk environment particularly in males, and a  
10 contribution of an allelic variant of *DRD2* to genetic risk for depressiveness  
11 particularly in males (Table 2).  
12  
13  
14  
15  
16  
17  
18  
19  
20  
21  
22  
23  
24  
25  
26

27 The *COMT* gene encoding for catechol-O-methyltransferase enzyme is among  
28 the most investigated genes in psychiatric genetics. The enzyme degrades  
29 catecholamine neurotransmitters such as dopamine, noradrenaline and  
30 adrenaline by catalyzing the transfer of a methyl group from S-  
31 adenosylmethionine to the catecholamines. Its enzymatic activity varies  
32 according to a G-to-A transition at codon 158 in the *COMT* gene, resulting in a  
33 valine-to-methionine substitution (Val158Met) on the protein level.[31] The  
34 enzyme encoded by the Val158 allele has a 3-4 fold higher activity than that  
35 encoded by the Met158 allele. Here, we found an association of the haplotype  
36 comprising rs5993883 between LD blocks 1 and 2 of *COMT*, as well as  
37 rs2239393 and rs4680, which are two variants in virtually complete linkage  
38 disequilibrium in block 2, with depressive symptoms in high developmental risk  
39 males (P=0.0053). The high risk haplotype included the high activity variant  
40  
41  
42  
43  
44  
45  
46  
47  
48  
49  
50  
51  
52  
53  
54  
55  
56  
57  
58  
59  
60

1  
2  
3 Val158 of *COMT*, the allele G of rs4680. This allele has repeatedly been found to  
4  
5 be associated with a poor response to pharmacological treatment of  
6  
7 depression,[32, 33] and a European multicenter study identified an association  
8  
9 between that allele and early onset major depression.[34] The Val158 allele has  
10  
11 already earlier been found to associate with cognitive deficits including poor  
12  
13 performance in tasks related to higher-order components of processing[35] and  
14  
15 perseverative errors, less efficient physiologic responses in the prefrontal  
16  
17 cortex,[36] and even schizophrenia based on a meta-analysis,[37] although the  
18  
19 effect was not significant when studies with allele frequencies deviating from the  
20  
21 Hardy-Weinberg equilibrium were excluded.  
22  
23  
24  
25  
26  
27  
28

29 In our study we observed evidence for interaction between *COMT* and an early  
30  
31 developmental risk environment on depressive symptoms. This interaction could  
32  
33 not be explained through gene-environment correlations. Nor were we able to  
34  
35 detect a significant correlation of the developmental risk environment with  
36  
37 depressive symptoms, despite the prior evidence for the role of its markers,  
38  
39 which were low birth weight[21, 27] and late motor or verbal development[28], in  
40  
41 decreased psychiatric health and wellbeing, including depression. This finding  
42  
43 may reflect the presence of other environmental risk indicators which were not  
44  
45 examined in our study. However, they may also reflect individual variability in  
46  
47 response to the risk environment and presence of genetic factors (such as the  
48  
49 *COMT* haplotype containing Met158) that may relate to resilience, adaptive  
50  
51 changes in regulation of emotion reactivity and successful coping with stress.[38]  
52  
53  
54  
55  
56  
57  
58  
59  
60

1  
2  
3 The observed risk also seemed to arise from an aggregation of the  
4 environmental indicators, as none of the risk items separately gave evidence of  
5 GxE with the risk variants from *COMT* or *DRD3* (data not shown). This could  
6 reflect a cumulative nature of these environmental influences, such that the effect  
7 of one marker may be weak, but the accumulated effect of multiple markers,  
8 together with genetic susceptibility, would be strong enough to increase the risk  
9 for a deviant development of emotional regulation and thus depressiveness.[39]  
10  
11 There is some prior evidence of interaction of *COMT* with a risk environment on  
12 psychosis, antisocial behaviour and dissociation. A study on children with ADHD  
13 showed a gene-environment interaction between the Val/Val genotype and low  
14 birth weight on early-onset antisocial behaviour,[40] and the Val158 allele was  
15 also found to associate with cannabis use and psychotic symptoms[41] and with  
16 increasing levels of dissociation in those exposed to higher levels of childhood  
17 trauma.[42] Interestingly, a recent report[43] revealed an impact of that  
18 polymorphism on gender-related patterns of regulation of emotions (activation in  
19 limbic and paralimbic regions) in line with findings of the present study.  
20  
21  
22  
23  
24  
25  
26  
27  
28  
29  
30  
31  
32  
33  
34  
35  
36  
37  
38  
39  
40  
41  
42

43 Another major finding of the present study, and statistically the strongest one,  
44 was observed in the dopamine receptor D2 gene *DRD2*, where a haplotype  
45 comprising the intronic variants rs4648318 in LD block 2 and rs4274224 in block  
46 3 was found to associate with depressive symptoms particularly in males,  
47 regardless of their early environment ( $P=0.00005$ ). Dopamine receptors have key  
48 roles in a variety of processes in the vertebrate central nervous system, and  
49  
50  
51  
52  
53  
54  
55  
56  
57  
58  
59  
60

1  
2  
3 dysfunction in dopaminergic neurotransmission may therefore predispose to a  
4 variety of neuropsychiatric disorders. Among the receptor genes, *DRD2* has  
5 attracted the most attention and has been implied to have a role in the etiology of  
6 several psychiatric disorders. However, there are only a few previous reports on  
7 unipolar depression, including positive,[44] nominal[45] and negative[46, 47]  
8 findings, and for results on depression conditional on risk environment.[44, 46,  
9 48]

10  
11  
12  
13  
14  
15  
16  
17  
18  
19  
20  
21  
22 Our varying results for males and females in general imply different mechanisms  
23 of mood regulation and possible gender-specific responses to environmental  
24 effectors. Gender differences in depression[2, 49] as well as in temperament  
25 traits[49] have previously been reported in various populations, including the  
26 current one,[50] and the prevalence of depression is higher in women.[51] A true  
27 gender-specific effect of genetic variants on depressiveness would not be  
28 surprising, as there is evidence of gender differences in dopaminergic  
29 function[52] that may be estrogen-dependent.

30  
31  
32  
33  
34  
35  
36  
37  
38  
39  
40  
41  
42  
43 It is noteworthy that despite previous reports of the 5-HTTLPR variant,[13] we did  
44 not detect association evidence for *SLC6A4*. Similarly, a recent meta-analysis did  
45 not find any evidence of an association with depression alone, or in interaction  
46 with stressful life-events,[16] although a current review[14] and a meta-analysis  
47 of all studies to date[15] support the positive association findings and the role of  
48 5-HTTLPR and stress in depression. The *SLC6A4* SNPs included in our study  
49  
50  
51  
52  
53  
54  
55  
56  
57  
58  
59  
60

1  
2  
3 tag the 5-HTTLPR well ( $D' > 0.9$ ), as determined by using genotypes from a  
4  
5 population-based Finnish Health 2000 study.[53] Moreover, the LD measure thus  
6  
7 obtained is conservative, since in the population under current study LD has  
8  
9 been shown to be stronger than in the general Finnish population, which was  
10  
11 represented by the Health 2000 study sample.[54]  
12  
13

14  
15  
16  
17 We did not use the Bonferroni correction for multiple testing due to limitations of  
18  
19 sample size and expected magnitude of gene effects in complex traits. Although  
20  
21 none of the results from the primary analyses (Table 2) survive conservative  
22  
23 correction, a neurobiological a priori hypothesis based on previously published  
24  
25 studies supports the validity of our most robust findings. It is, however,  
26  
27 noteworthy that they were observed only when the sample was conditioned on  
28  
29 environmental risk or gender. Still, the strongest association signal, obtained  
30  
31 using *DRD2*'s rs4274224 with HSCL score in males ( $P = 0.0006$ ), remains close to  
32  
33 statistical significance even when taking into account the amount of multiple  
34  
35 testing performed. The finding was further supported by results of our haplotype  
36  
37 analysis containing rs4274224, which showed a statistically significant  
38  
39 association with the HSCL score in males ( $P = 0.00005$ ).  
40  
41  
42  
43  
44  
45  
46  
47

48 There are some limitations in the present study. First, it is notable that  
49  
50 depression as defined here did not necessarily signify a clinical diagnosis of  
51  
52 major depression. Instead it was defined either based on self-report or on the  
53  
54 score from HSCL, which as a measure has its limitations. However, the  
55  
56  
57  
58  
59  
60

1  
2  
3 prevalence of depressed mood was in the same range as in earlier reports.[1, 55]  
4  
5 Secondly, there was a notable drop-out rate among the original material of all  
6  
7 cohort members. About half of the original cohort members did not participate in  
8  
9 this study. Finally, when the NFBC 1966 study was initiated it was not possible to  
10  
11 predict that an investigation such as the present one would one day be  
12  
13 conducted. Therefore, we are limited by the original choice of variables to be  
14  
15 collected, and the environmental risk factors may only be indicators or markers of  
16  
17 risk rather than risk factors themselves.[39] It is also noteworthy that we did not  
18  
19 detect any association with our measure of current depression and the  
20  
21 developmental risk environment, despite it being formulated based on previous  
22  
23 reports of their effects on psychiatric health and wellbeing.[27-30]. However, the  
24  
25 effect of genetic risk may be modulated by early life stress even though the direct  
26  
27 link between early life environment and current status would be too weak to be  
28  
29 detected in our study sample, and this modulating effect may be seen in the  
30  
31 results of the GxE analysis.  
32  
33  
34  
35  
36  
37  
38  
39  
40

41 The current study has several potential advantages, such as the availability of  
42  
43 longitudinal follow-up data starting antenatally, enabling us to include the  
44  
45 environmental dimension without any risk of recall bias. Another advantage is the  
46  
47 unique genetic structure of our study cohort, characterized by isolation, founder  
48  
49 effect, multiple bottlenecks and more genetic homogeneity compared to many  
50  
51 other isolates,[56] allowing us to identify genetic risk loci that may be missed in  
52  
53 the screening of other more heterogeneous populations. Furthermore, the  
54  
55  
56  
57  
58  
59  
60



1  
2  
3 subjects were representative, with all cohort members born in the same year and  
4  
5 within a geographically defined area.  
6  
7  
8  
9

10 In addition, the size of the sample is sufficient to identify genetic variants of  
11 moderate impact. We also have both genders represented in almost equal  
12 amounts (48% males, 52% females), which is notable since gender differences  
13 are evident both in depression[2, 49] and in temperament traits, for example  
14 Harm avoidance.[49] It is also beneficial that the sample is a one-year birth  
15 cohort, as it is well established that some psychiatric traits, such as Harm  
16 avoidance[57] of temperament, are age-dependent. We can therefore isolate  
17 genetic effects from the effects of aging. Furthermore, we provide a complete  
18 coverage of the major candidate genes that are relevant with the present focus.  
19  
20  
21  
22  
23  
24  
25  
26  
27  
28  
29  
30  
31  
32  
33

34 Our results support the role of *COMT* and *DRD2*, two genes of monoamine  
35 neurotransmission, in the etiology of depression conditional on environmental  
36 risk particularly in males, though not direct effects of monoaminergic genes in  
37 this unselected population. These findings imply that the nature of the role of  
38 monoaminergic genes in depression should be examined further in future  
39 studies, and are pending replication in other, independent population samples.  
40  
41  
42  
43  
44  
45  
46  
47  
48  
49

## 50 **ACKNOWLEDGEMENTS, COMPETING INTERESTS, FUNDING**

51  
52  
53  
54  
55  
56  
57  
58  
59  
60

1  
2  
3 This study was funded by the Academy of Finland's CoE in Complex Disease  
4 Genetics; the Biocentrum Helsinki Foundation; the Academy of Finland's grant to  
5  
6 the NFBC Studies, to Dr. Tiina Paunio, Post-doctoral Fellowship to Dr. Anu  
7  
8 Loukola and Academy Researcher Fellowship to Dr. Jouko Miettunen; the  
9  
10 University of Helsinki Research Foundation grant for young researchers to Emma  
11  
12 Nyman; and the Signe and Ane Gyllenberg Foundation grant to Dr. Pirjo Mäki.  
13  
14 There are no significant competing financial, professional or personal interests  
15  
16 that could have influenced the performance or presentation of the current study.  
17  
18  
19  
20  
21  
22  
23  
24  
25  
26

## 27 **CONTRIBUTORS**

28  
29  
30  
31 Tiina Paunio, Emma Nyman, Sonja Sulkava, Jouko Miettunen, Matti Joukamaa  
32  
33 and Juha Veijola designed the study and wrote the protocol, with help also from  
34  
35 Nelson Freimer, Pirjo Mäki, Leena Peltonen and Marjo-Riitta Järvelin. Emma  
36  
37 Nyman and to some extent Tiina Paunio also managed the literature searches.  
38  
39 Sonja Sulkava and Emma Nyman undertook the statistical analyses. Emma  
40  
41 Nyman and Tiina Paunio wrote the first draft of the manuscript, and other authors  
42  
43 contributed to its later versions. All authors contributed to and have approved the  
44  
45 final manuscript.  
46  
47  
48  
49  
50  
51  
52  
53  
54

## 55 **COPYRIGHT LICENCE STATEMENT**

1  
2  
3  
4  
5  
6 The Corresponding Author has the right to grant on behalf of all authors and  
7  
8 does grant on behalf of all authors, an exclusive licence to the BMJ Publishing  
9  
10 Group Ltd to permit this article (if accepted) to be published in BMJ Open.  
11  
12  
13  
14  
15  
16  
17  
18  
19  
20  
21  
22  
23  
24  
25  
26  
27  
28  
29  
30  
31  
32  
33  
34  
35  
36  
37  
38  
39  
40  
41  
42  
43  
44  
45  
46  
47  
48  
49  
50  
51  
52  
53  
54  
55  
56  
57  
58  
59  
60

For peer review only

## REFERENCES

- 1 Kessler RC, Berglund P, Demler O, Jin R, Koretz D, Merikangas KR, Rush AJ, Walters EE, Wang PS. The epidemiology of major depressive disorder: results from the National Comorbidity Survey Replication (NCS-R). *Jama*. 2003;289:3095-105.
- 2 Kendler KS, Gatz M, Gardner CO, Pedersen NL. A Swedish national twin study of lifetime major depression. *Am J Psychiatry*. 2006;163:109-14.
- 3 Bosker FJ, Hartman CA, Nolte IM, Prins BP, Terpstra P, Posthuma D, van Veen T, Willemsen G, Derijk RH, de Geus EJ, Hoogendijk WJ, Sullivan PF, Penninx BW, Boomsma DI, Snieder H, Nolen WA. Poor replication of candidate genes for major depressive disorder using genome-wide association data. *Mol Psychiatry*.
- 4 Melartin TK, Rytsala HJ, Leskela US, Lestela-Mielonen PS, Sokero TP, Isometsa ET. Current comorbidity of psychiatric disorders among DSM-IV major depressive disorder patients in psychiatric care in the Vantaa Depression Study. *J Clin Psychiatry*. 2002;63:126-34.
- 5 Jylha P, Isometsa E. The relationship of neuroticism and extraversion to symptoms of anxiety and depression in the general population. *Depress Anxiety*. 2006;23:281-9.
- 6 Jylha P, Isometsa E. Temperament, character and symptoms of anxiety and depression in the general population. *Eur Psychiatry*. 2006;21:389-95.
- 7 Cloninger CR, Svrakic DM, Przybeck TR. Can personality assessment predict future depression? A twelve-month follow-up of 631 subjects. *J Affect Disord*. 2006;92:35-44.
- 8 Ansorge MS, Hen R, Gingrich JA. Neurodevelopmental origins of depressive disorders. *Curr Opin Pharmacol*. 2007;7:8-17.
- 9 Caspi A, Moffitt TE. Gene-environment interactions in psychiatry: joining forces with neuroscience. *Nat Rev Neurosci*. 2006;7:583-90.
- 10 Cerda M, Sagdeo A, Johnson J, Galea S. Genetic and environmental influences on psychiatric comorbidity: a systematic review. *J Affect Disord*. 126:14-38.
- 11 Schildkraut JJ. The catecholamine hypothesis of affective disorders: a review of supporting evidence. *Am J Psychiatry*. 1965;122:509-22.
- 12 Meyer-Lindenberg A. Neural connectivity as an intermediate phenotype: brain networks under genetic control. *Hum Brain Mapp*. 2009;30:1938-46.
- 13 Caspi A, Sugden K, Moffitt TE, Taylor A, Craig IW, Harrington H, McClay J, Mill J, Martin J, Braithwaite A, Poulton R. Influence of life stress on depression: moderation by a polymorphism in the 5-HTT gene. *Science*. 2003;301:386-9.
- 14 Uher R, McGuffin P. The moderation by the serotonin transporter gene of environmental adversity in the etiology of depression: 2009 update. *Mol Psychiatry*. 15:18-22.
- 15 Karg K, Burmeister M, Shedden K, Sen S. The Serotonin Transporter Promoter Variant (5-HTTLPR), Stress, and Depression Meta-analysis Revisited: Evidence of Genetic Moderation. *Arch Gen Psychiatry*.

- 1  
2  
3  
4  
5  
6  
7  
8  
9  
10  
11  
12  
13  
14  
15  
16  
17  
18  
19  
20  
21  
22  
23  
24  
25  
26  
27  
28  
29  
30  
31  
32  
33  
34  
35  
36  
37  
38  
39  
40  
41  
42  
43  
44  
45  
46  
47  
48  
49  
50  
51  
52  
53  
54  
55  
56  
57  
58  
59  
60
- 16 Risch N, Herrell R, Lehner T, Liang KY, Eaves L, Hoh J, Griem A, Kovacs M, Ott J, Merikangas KR. Interaction between the serotonin transporter gene (5-HTTLPR), stressful life events, and risk of depression: a meta-analysis. *Jama*. 2009;301:2462-71.
- 17 Opmeer EM, Kortekaas R, Aleman A. Depression and the role of genes involved in dopamine metabolism and signalling. *Prog Neurobiol*. 92:112-33.
- 18 Waider J, Araragi N, Gutknecht L, Lesch KP. Tryptophan hydroxylase-2 (TPH2) in disorders of cognitive control and emotion regulation: a perspective. *Psychoneuroendocrinology*. 36:393-405.
- 19 Hayden EP, Klein DN, Dougherty LR, Olino TM, Lipton RS, Dyson MW, Bufferd SJ, Durbin CE, Sheikh HI, Singh SM. The dopamine D2 receptor gene and depressive and anxious symptoms in childhood: associations and evidence for gene-environment correlation and gene-environment interaction. *Psychiatr Genet*. 20:304-10.
- 20 Levitan RD, Masellis M, Lam RW, Kaplan AS, Davis C, Tharmalingam S, Mackenzie B, Basile VS, Kennedy JL. A birth-season/DRD4 gene interaction predicts weight gain and obesity in women with seasonal affective disorder: A seasonal thrifty phenotype hypothesis. *Neuropsychopharmacology*. 2006;31:2498-503.
- 21 Rantakallio P. Groups at risk in low birth weight infants and perinatal mortality. *Acta Paediatr Scand*. 1969;193:Suppl 193:1+.
- 22 Haapea M, Miettunen J, Laara E, Joukamaa MI, Jarvelin MR, Isohanni MK, Veijola JM. Non-participation in a field survey with respect to psychiatric disorders. *Scand J Public Health*. 2008;36:728-36.
- 23 Veijola J, Jokelainen J, Laksy K, Kantojarvi L, Kokkonen P, Jarvelin MR, Joukamaa M. The Hopkins Symptom Checklist-25 in screening DSM-III-R axis-I disorders. *Nord J Psychiatry*. 2003;57:119-23.
- 24 Miettunen J, Kantojarvi L, Ekelund J, Veijola J, Karvonen JT, Peltonen L, Jarvelin MR, Freimer N, Lichtermann D, Joukamaa M. A large population cohort provides normative data for investigation of temperament. *Acta Psychiatr Scand*. 2004;110:150-7.
- 25 Cloninger CR, Svrakic DM, Przybeck TR. A psychobiological model of temperament and character. *Arch Gen Psychiatry*. 1993;50:975-90.
- 26 Winokur A, Winokur DF, Rickels K, Cox DS. Symptoms of emotional distress in a family planning service: stability over a four-week period. *Br J Psychiatry*. 1984;144:395-9.
- 27 Barker DJ, Osmond C, Forsen TJ, Kajantie E, Eriksson JG. Trajectories of growth among children who have coronary events as adults. *N Engl J Med*. 2005;353:1802-9.
- 28 Isohanni M, Jones PB, Moilanen K, Rantakallio P, Veijola J, Oja H, Koiranen M, Jokelainen J, Croudace T, Jarvelin M. Early developmental milestones in adult schizophrenia and other psychoses. A 31-year follow-up of the Northern Finland 1966 Birth Cohort. *Schizophr Res*. 2001;52:1-19.
- 29 Myhrman A, Rantakallio P, Isohanni M, Jones P, Partanen U. Unwantedness of a pregnancy and schizophrenia in the child. *Br J Psychiatry*. 1996;169:637-40.
- 30 Goodman E, Huang B. Socioeconomic status, depressive symptoms, and adolescent substance use. *Arch Pediatr Adolesc Med*. 2002;156:448-53.
- 31 Lachman HM, Papolos DF, Saito T, Yu YM, Szumlanski CL, Weinshilboum RM. Human catechol-O-methyltransferase pharmacogenetics: description of a functional

- polymorphism and its potential application to neuropsychiatric disorders. *Pharmacogenetics*. 1996;6:243-50.
- 32 Tsai SJ, Gau YT, Hong CJ, Liou YJ, Yu YW, Chen TJ. Sexually dimorphic effect of catechol-O-methyltransferase val158met polymorphism on clinical response to fluoxetine in major depressive patients. *J Affect Disord*. 2009;113:183-7.
- 33 Baune BT, Hohoff C, Berger K, Neumann A, Mortensen S, Roehrs T, Deckert J, Arolt V, Domschke K. Association of the COMT val158met variant with antidepressant treatment response in major depression. *Neuropsychopharmacology*. 2008;33:924-32.
- 34 Massat I, Souery D, Del-Favero J, Nothen M, Blackwood D, Muir W, Kaneva R, Serretti A, Lorenzi C, Rietschel M, Milanova V, Papadimitriou GN, Dikeos D, Van Broekhoven C, Mendlewicz J. Association between COMT (Val158Met) functional polymorphism and early onset in patients with major depressive disorder in a European multicenter genetic association study. *Mol Psychiatry*. 2005;10:598-605.
- 35 Bruder GE, Keilp JG, Xu H, Shikhman M, Schori E, Gorman JM, Gilliam TC. Catechol-O-methyltransferase (COMT) genotypes and working memory: associations with differing cognitive operations. *Biol Psychiatry*. 2005;58:901-7.
- 36 Egan MF, Goldberg TE, Kolachana BS, Callicott JH, Mazzanti CM, Straub RE, Goldman D, Weinberger DR. Effect of COMT Val108/158 Met genotype on frontal lobe function and risk for schizophrenia. *Proc Natl Acad Sci U S A*. 2001;98:6917-22.
- 37 Munafò MR, Bowes L, Clark TG, Flint J. Lack of association of the COMT (Val158/108 Met) gene and schizophrenia: a meta-analysis of case-control studies. *Mol Psychiatry*. 2005;10:765-70.
- 38 Feder A, Nestler EJ, Charney DS. Psychobiology and molecular genetics of resilience. *Nat Rev Neurosci*. 2009;10:446-57.
- 39 Moffitt TE, Caspi A, Rutter M. Strategy for investigating interactions between measured genes and measured environments. *Arch Gen Psychiatry*. 2005;62:473-81.
- 40 Thapar A, Langley K, Fowler T, Rice F, Turic D, Whittinger N, Aggleton J, Van den Bree M, Owen M, O'Donovan M. Catechol O-methyltransferase gene variant and birth weight predict early-onset antisocial behavior in children with attention-deficit/hyperactivity disorder. *Arch Gen Psychiatry*. 2005;62:1275-8.
- 41 Caspi A, Moffitt TE, Cannon M, McClay J, Murray R, Harrington H, Taylor A, Arseneault L, Williams B, Braithwaite A, Poulton R, Craig IW. Moderation of the effect of adolescent-onset cannabis use on adult psychosis by a functional polymorphism in the catechol-O-methyltransferase gene: longitudinal evidence of a gene X environment interaction. *Biol Psychiatry*. 2005;57:1117-27.
- 42 Savitz JB, van der Merwe L, Newman TK, Solms M, Stein DJ, Ramesar RS. The relationship between childhood abuse and dissociation. Is it influenced by catechol-O-methyltransferase (COMT) activity? *Int J Neuropsychopharmacol*. 2008;11:149-61.
- 43 Kempton MJ, Haldane M, Jogia J, Christodoulou T, Powell J, Collier D, Williams SC, Frangou S. The effects of gender and COMT Val158Met polymorphism on fearful facial affect recognition: a fMRI study. *Int J Neuropsychopharmacol*. 2009;12:371-81.
- 44 Guo G, Tillman KH. Trajectories of depressive symptoms, dopamine D2 and D4 receptors, family socioeconomic status and social support in adolescence and young adulthood. *Psychiatr Genet*. 2009;19:14-26.
- 45 Koks S, Nikopousios T, Koido K, Maron E, Altmae S, Heinaste E, Vabrit K, Tammekivi V, Hallast P, Kurg A, Shlik J, Vasar V, Metspalu A, Vasar E. Analysis of

- 1  
2  
3 SNP profiles in patients with major depressive disorder. *Int J Neuropsychopharmacol*.  
4 2006;9:167-74.  
5  
6 46 Vaske J, Makarios M, Boisvert D, Beaver KM, Wright JP. The interaction of  
7 DRD2 and violent victimization on depression: an analysis by gender and race. *J Affect*  
8 *Disord*. 2009;112:120-5.  
9  
10 47 Furlong RA, Coleman TA, Ho L, Rubinsztein JS, Walsh C, Paykel ES,  
11 Rubinsztein DC. No association of a functional polymorphism in the dopamine D2  
12 receptor promoter region with bipolar or unipolar affective disorders. *Am J Med Genet*.  
13 1998;81:385-7.  
14  
15 48 Elovainio M, Jokela M, Kivimaki M, Pulkki-Raback L, Lehtimaki T, Airla N,  
16 Keltikangas-Jarvinen L. Genetic variants in the DRD2 gene moderate the relationship  
17 between stressful life events and depressive symptoms in adults: cardiovascular risk in  
18 young Finns study. *Psychosom Med*. 2007;69:391-5.  
19  
20 49 Miettunen J, Veijola J, Lauronen E, Kantojarvi L, Joukamaa M. Sex differences  
21 in Cloninger's temperament dimensions--a meta-analysis. *Compr Psychiatry*.  
22 2007;48:161-9.  
23  
24 50 Herva A, Laitinen J, Miettunen J, Veijola J, Karvonen JT, Laksy K, Joukamaa M.  
25 Obesity and depression: results from the longitudinal Northern Finland 1966 Birth Cohort  
26 Study. *Int J Obes (Lond)*. 2006;30:520-7.  
27  
28 51 Kuehner C. Gender differences in unipolar depression: an update of  
29 epidemiological findings and possible explanations. *Acta Psychiatr Scand*. 2003;108:163-  
30 74.  
31  
32 52 Andersen SL, Teicher MH. Sex differences in dopamine receptors and their  
33 relevance to ADHD. *Neurosci Biobehav Rev*. 2000;24:137-41.  
34  
35 53 Utge S, Soronen P, Partonen T, Loukola A, Kronholm E, Pirkola S, Nyman E,  
36 Porkka-Heiskanen T, Paunio T. A population-based association study of candidate genes  
37 for depression and sleep disturbance. *Am J Med Genet B Neuropsychiatr Genet*. 2009.  
38  
39 54 Jakkula E, Rehnstrom K, Varilo T, Pietilainen OP, Paunio T, Pedersen NL,  
40 deFaire U, Jarvelin MR, Saharinen J, Freimer N, Ripatti S, Purcell S, Collins A, Daly MJ,  
41 Palotie A, Peltonen L. The genome-wide patterns of variation expose significant  
42 substructure in a founder population. *Am J Hum Genet*. 2008;83:787-94.  
43  
44 55 Suvisaari J, Aalto-Setala T, Tuulio-Henriksson A, Harkanen T, Saarni SI, Perala  
45 J, Schreck M, Castaneda A, Hintikka J, Kestila L, Lahteenmaki S, Latvala A, Koskinen  
46 S, Marttunen M, Aro H, Lonnqvist J. Mental disorders in young adulthood. *Psychol Med*.  
47 2009;39:287-99.  
48  
49 56 Service S, DeYoung J, Karayiorgou M, Roos JL, Pretorius H, Bedoya G, Ospina  
50 J, Ruiz-Linares A, Macedo A, Palha JA, Heutink P, Aulchenko Y, Oostra B, van Duijn C,  
51 Jarvelin MR, Varilo T, Peddle L, Rahman P, Piras G, Monne M, Murray S, Galver L,  
52 Peltonen L, Sabatti C, Collins A, Freimer N. Magnitude and distribution of linkage  
53 disequilibrium in population isolates and implications for genome-wide association  
54 studies. *Nat Genet*. 2006;38:556-60.  
55  
56 57 Brandstrom S, Schlette P, Przybeck TR, Lundberg M, Forsgren T, Sigvardsson S,  
57 Nylander PO, Nilsson LG, Cloninger RC, Adolfsson R. Swedish normative data on  
58 personality using the Temperament and Character Inventory. *Compr Psychiatry*.  
59 1998;39:122-8.  
60

1  
2  
3  
4  
5  
6  
7  
8  
9  
10  
11  
12  
13  
14  
15  
16  
17  
18  
19  
20  
21  
22  
23  
24  
25  
26  
27  
28  
29  
30  
31  
32  
33  
34  
35  
36  
37  
38  
39  
40  
41  
42  
43  
44  
45  
46  
47  
48  
49  
50  
51  
52  
53  
54  
55  
56  
57  
58  
59  
60

For peer review only



**Table 1.** Composition of the study sample from the NFBC 1966.

|                | <i>N</i> | <i>HSCL score &gt; 1.75</i> <sup>1</sup> | <i>Depression diagnosis</i> | <i>Early developmental risk environment</i> <sup>2</sup> |                  |                        | <i>Social risk environment</i> <sup>3</sup> |                 |                        |
|----------------|----------|------------------------------------------|-----------------------------|----------------------------------------------------------|------------------|------------------------|---------------------------------------------|-----------------|------------------------|
|                |          |                                          |                             | <i>High-risk</i> <sup>4</sup>                            | <i>sLow-risk</i> | <i>nd</i> <sup>5</sup> | <i>High-risk</i> <sup>4</sup>               | <i>Low-risk</i> | <i>nd</i> <sup>4</sup> |
| <i>Males</i>   | 2509     | 169 (7%)                                 | 79(3%)                      | 229 (9%)                                                 | 2094 (83%)       | 186 (7%)               | 912 (36%)                                   | 1574 (63%)      | 23 (0.9%)              |
| <i>Females</i> | 2716     | 269(10%)                                 | 136(5%)                     | 193 (7%)                                                 | 2328 (86%)       | 195 (7%)               | 1034 (38%)                                  | 1649 (61%)      | 33 (1.2%)              |
| <i>All</i>     | 5225     | 438(8%)                                  | 215(4%)                     | 422 (8%)                                                 | 4422 (85%)       | 381 (7%)               | 1946 (37%)                                  | 3223 (62%)      | 56 (1.1%)              |

<sup>1</sup> There is prior support for using the HSCL score 1.75 as a cut-off when aiming to identify clinical depression.

<sup>2</sup> Defined by the presence of two out of three possible indicators for the early developmental risk environment: low birth weight, late motor development, and late development of speech.

<sup>3</sup> Defined by the presence of two out of five possible indicators for the social risk environment: unwantedness of pregnancy, low socio-economic status, single parenthood, low level of education of mother, and low activity for information retrieval by the mother. For further details, see text.

<sup>4</sup> Both early developmental and environmental risk present in 92 males (3,6%) and 67 females (2,4%).

<sup>5</sup> Not defined.

**Table 2.** Interaction (GxE) and correlation (rGE) between genetic variants of genes of monoamine neurotransmission and early developmental risk environment (GxE<sub>Dev</sub>, rGE<sub>Dev</sub>),<sup>1</sup> social risk environment (GxE<sub>Soc</sub>, rG<sub>Soc</sub>),<sup>2</sup> and gender (GxSex) on current depressive symptoms (HSCL score), and genetic association to HSCL score in the complete study sample from the NFBC 1966 (All). The analyses were performed using PLINK's linear and logistic regression models and interaction analysis. Empirical P-values based on max(T) permutation are reported, with P-values <0.05 shown in bold.

| Gene      | Gene name                    | Chromosome | SNP        | Position/bp | Minor allele | MAF <sup>3</sup> | P(GxE <sub>Dev</sub> )   | P(GxE <sub>Soc</sub> ) | P(GxSex)                 | P(All)                    | P(rGE <sub>Dev</sub> ) | P(rG <sub>Soc</sub> ) |
|-----------|------------------------------|------------|------------|-------------|--------------|------------------|--------------------------|------------------------|--------------------------|---------------------------|------------------------|-----------------------|
| SLC6A4    | Serotonin transporter        | 17         | rs1906451  | 25539605    | G            | 0.44             | 0.608                    | 0.363                  | 0.784                    | 0.268                     | 0.747                  | <b>0.035</b>          |
|           |                              |            | rs3794808  | 25555919    | A            | 0.41             | 0.365                    | 0.263                  | 0.799                    | 0.320                     | 0.402                  | 0.064                 |
|           |                              |            | rs140700   | 25567515    | A            | 0.09             | 0.133                    | 0.460                  | <b>0.037<sup>8</sup></b> | 0.876                     | 0.209                  | 0.614                 |
|           |                              |            | rs2066713  | 25575791    | A            | 0.46             | 0.253                    | 0.499                  | 0.505                    | 0.550                     | 0.778                  | 0.092                 |
|           |                              |            | rs8071667  | 25576899    | A            | 0.15             | 0.473                    | 0.682                  | 0.122                    | 0.606                     | 0.961                  | 0.827                 |
| TPH2      | Tryptophan hydroxylase 2     | 12         | rs4131348  | 70610746    | G            | 0.12             | 0.844                    | 0.937                  | 0.400                    | 0.497                     | 0.705                  | 0.241                 |
|           |                              |            | rs2129575  | 70626340    | A            | 0.22             | 0.787                    | 0.682                  | 0.432                    | 0.423                     | 0.173                  | 0.298                 |
|           |                              |            | rs1386496  | 70637057    | G            | 0.16             | 0.983                    | 0.404                  | 0.293                    | 0.792                     | 0.837                  | 0.226                 |
|           |                              |            | rs2171363  | 70646531    | A            | 0.43             | 0.762                    | 0.983                  | <b>0.016<sup>8</sup></b> | 0.814                     | 0.692                  | 0.940                 |
|           |                              |            | rs10506645 | 70671767    | A            | 0.23             | 0.996                    | 0.756                  | 0.102                    | 0.789                     | 0.888                  | 0.721                 |
|           |                              |            | rs1386497  | 70678557    | C            | 0.17             | 0.816                    | 0.131                  | 0.452                    | 0.797                     | 0.640                  | 0.172                 |
|           |                              |            | rs1487276  | 70691326    | A            | 0.21             | 0.888                    | 0.088                  | 0.838                    | 0.908                     | 0.591                  | 0.219                 |
|           |                              |            | rs9325202  | 70693744    | A            | 0.48             | 0.805                    | 0.074                  | 0.488                    | 0.473                     | 0.913                  | 0.675                 |
|           |                              |            | rs1487275  | 70696559    | C            | 0.37             | 0.972                    | 0.054                  | 0.625                    | <b>0.049<sup>10</sup></b> | 0.861                  | 0.638                 |
|           |                              |            | rs1386483  | 70698761    | A            | 0.47             | 0.574                    | 0.090                  | 0.326                    | 0.437                     | 0.294                  | 0.625                 |
| rs1872824 | 70716581                     | A          | 0.35       | 0.652       | 0.121        | 0.211            | 0.494                    | 0.772                  | 0.331                    |                           |                        |                       |
| COMT      | Catechol-O-methyltransferase | 22         | rs6518591  | 18304021    | G            | 0.16             | 0.688                    | 0.255                  | 0.919                    | 0.303                     | 0.150                  | 0.385                 |
|           |                              |            | rs737866   | 18310109    | G            | 0.18             | <b>0.028<sup>4</sup></b> | 0.853                  | <b>0.024<sup>8</sup></b> | 0.755                     | 0.623                  | 0.489                 |

|    |      |                      |    |            |           |   |      |                          |       |                          |                           |              |       |
|----|------|----------------------|----|------------|-----------|---|------|--------------------------|-------|--------------------------|---------------------------|--------------|-------|
| 1  |      |                      |    |            |           |   |      |                          |       |                          |                           |              |       |
| 2  |      |                      |    |            |           |   |      |                          |       |                          |                           |              |       |
| 3  |      |                      |    | rs1544325  | 18311668  | G | 0.48 | 0.318                    | 0.376 | 0.192                    | 0.822                     | 0.999        | 0.931 |
| 4  |      |                      |    | rs174675   | 18314051  | A | 0.29 | 0.465                    | 0.278 | 0.580                    | 0.958                     | 0.724        | 0.532 |
| 5  |      |                      |    | rs5993883  | 18317638  | C | 0.36 | 0.230                    | 0.495 | <b>0.025<sup>8</sup></b> | 0.920                     | 0.363        | 0.219 |
| 6  |      |                      |    | rs2239393  | 18330428  | G | 0.31 | <b>0.005<sup>5</sup></b> | 0.765 | 0.256                    | 0.930                     | 0.838        | 0.459 |
| 7  |      |                      |    | rs4680     | 18331271  | G | 0.45 | <b>0.020<sup>6</sup></b> | 0.956 | 0.501                    | 0.346                     | 0.412        | 0.498 |
| 8  |      |                      |    | rs4646316  | 18332132  | A | 0.18 | 0.205                    | 0.165 | 0.933                    | <b>0.026<sup>11</sup></b> | 0.521        | 0.392 |
| 9  |      |                      |    | rs165774   | 18332561  | A | 0.25 | 0.081                    | 0.516 | 0.089                    | 0.215                     | 0.538        | 0.239 |
| 10 |      |                      |    | rs165815   | 18339473  | G | 0.20 | 0.537                    | 0.309 | 0.431                    | 0.281                     | 0.338        | 0.158 |
| 11 |      |                      |    | rs887199   | 18341955  | A | 0.20 | 0.544                    | 0.325 | 0.401                    | 0.306                     | 0.314        | 0.168 |
| 12 |      |                      |    | rs2239395  | 18342203  | C | 0.02 | 0.144                    | 0.655 | 0.153                    | 0.390                     | 0.224        | 0.664 |
| 13 |      |                      |    |            |           |   |      |                          |       |                          |                           |              |       |
| 14 |      |                      |    |            |           |   |      |                          |       |                          |                           |              |       |
| 15 |      |                      |    |            |           |   |      |                          |       |                          |                           |              |       |
| 16 |      |                      |    |            |           |   |      |                          |       |                          |                           |              |       |
| 17 |      |                      |    |            |           |   |      |                          |       |                          |                           |              |       |
| 18 | MAOA | Monoamine oxidase A  | X  | rs909525   | 43438146  | G | 0.45 | 0.559                    | 0.871 | 0.554                    | 0.165                     | 0.255        | 0.932 |
| 19 |      |                      |    | rs12843268 | 43458610  | A | 0.40 | 0.271                    | 0.837 | 0.266                    | 0.103                     | 0.052        | 0.932 |
| 20 |      |                      |    | rs6610845  | 43472954  | G | 0.41 | 0.232                    | 0.795 | 0.263                    | 0.170                     | 0.060        | 0.524 |
| 21 |      |                      |    | rs3027409  | 43491977  | C | 0.02 | 0.748                    | 0.928 | 0.950                    | 0.194                     | 0.703        | 0.068 |
| 22 |      |                      |    | rs6609257  | 43497652  | G | 0.50 | 0.848                    | 0.320 | 0.470                    | 0.077                     | 0.075        | 0.898 |
| 23 |      |                      |    | rs3027415  | 43499385  | G | 0.18 | 0.218                    | 0.550 | 0.905                    | 0.613                     | 0.105        | 0.408 |
| 24 |      |                      |    |            |           |   |      |                          |       |                          |                           |              |       |
| 25 |      |                      |    |            |           |   |      |                          |       |                          |                           |              |       |
| 26 |      |                      |    |            |           |   |      |                          |       |                          |                           |              |       |
| 27 | DRD1 | Dopamine receptor D1 | 5  | rs265973   | 174793305 | G | 0.50 | 0.529                    | 0.614 | 0.549                    | 0.888                     | <b>0.047</b> | 0.831 |
| 28 |      |                      |    | rs265974   | 174793846 | G | 0.35 | 0.391                    | 0.612 | 0.912                    | 0.659                     | 0.066        | 0.859 |
| 29 |      |                      |    | rs265976   | 174795026 | A | 0.23 | 0.578                    | 0.707 | 0.915                    | 0.826                     | 0.077        | 0.933 |
| 30 |      |                      |    | rs5326     | 174802802 | A | 0.19 | 0.615                    | 0.886 | 0.852                    | 0.588                     | 0.273        | 0.197 |
| 31 |      |                      |    |            |           |   |      |                          |       |                          |                           |              |       |
| 32 |      |                      |    |            |           |   |      |                          |       |                          |                           |              |       |
| 33 |      |                      |    |            |           |   |      |                          |       |                          |                           |              |       |
| 34 | DRD2 | Dopamine receptor D2 | 11 | rs1800497  | 112776038 | A | 0.17 | 0.079                    | 0.825 | 0.691                    | 0.467                     | 0.921        | 0.264 |
| 35 |      |                      |    | rs2242592  | 112784640 | G | 0.37 | 0.757                    | 0.466 | 0.283                    | 0.736                     | 0.143        | 0.393 |
| 36 |      |                      |    | rs1076563  | 112801119 | C | 0.50 | 0.053                    | 0.813 | 0.897                    | 0.662                     | 0.234        | 0.856 |
| 37 |      |                      |    | rs2471857  | 112803549 | A | 0.17 | 0.518                    | 0.494 | 0.823                    | 0.901                     | 0.884        | 0.126 |
| 38 |      |                      |    | rs4620755  | 112814829 | A | 0.22 | 0.383                    | 0.997 | 0.951                    | 0.176                     | 0.065        | 0.992 |
| 39 |      |                      |    | rs7125415  | 112815891 | A | 0.19 | 0.084                    | 0.389 | 0.789                    | 0.231                     | 0.163        | 0.947 |
| 40 |      |                      |    |            |           |   |      |                          |       |                          |                           |              |       |
| 41 |      |                      |    |            |           |   |      |                          |       |                          |                           |              |       |
| 42 |      |                      |    |            |           |   |      |                          |       |                          |                           |              |       |
| 43 |      |                      |    |            |           |   |      |                          |       |                          |                           |              |       |
| 44 |      |                      |    |            |           |   |      |                          |       |                          |                           |              |       |
| 45 |      |                      |    |            |           |   |      |                          |       |                          |                           |              |       |
| 46 |      |                      |    |            |           |   |      |                          |       |                          |                           |              |       |
| 47 |      |                      |    |            |           |   |      |                          |       |                          |                           |              |       |

|    |             |                             |            |            |           |      |       |                           |                           |                            |                            |              |       |
|----|-------------|-----------------------------|------------|------------|-----------|------|-------|---------------------------|---------------------------|----------------------------|----------------------------|--------------|-------|
| 1  |             |                             |            |            |           |      |       |                           |                           |                            |                            |              |       |
| 2  |             |                             |            |            |           |      |       |                           |                           |                            |                            |              |       |
| 3  |             |                             | rs4648318  | 112818599  | G         | 0.34 | 0.711 | 0.885                     | 0.631                     | 0.684                      | 0.214                      | 0.466        |       |
| 4  |             |                             | rs4274224  | 112824662  | G         | 0.24 | 0.067 | 0.777                     | <b>0.017</b> <sup>9</sup> | <b>0.022</b> <sup>12</sup> | 0.536                      | 0.766        |       |
| 5  |             |                             | rs4581480  | 112829684  | G         | 0.07 | 0.184 | 0.521                     | 0.210                     | <b>0.009</b> <sup>13</sup> | 0.082                      | 0.760        |       |
| 6  |             |                             | rs7131056  | 112834984  | C         | 0.49 | 0.564 | 0.795                     | 0.413                     | 0.964                      | 0.622                      | 0.138        |       |
| 7  |             |                             | rs4938019  | 112846601  | G         | 0.23 | 0.069 | 0.651                     | 0.643                     | 0.584                      | 0.320                      | 0.059        |       |
| 8  |             |                             | rs12364283 | 112852165  | G         | 0.08 | 0.280 | 0.504                     | 0.441                     | 0.861                      | 0.633                      | 0.804        |       |
| 9  |             |                             | rs10891556 | 112857971  | A         | 0.24 | 0.076 | 0.519                     | 0.638                     | 0.589                      | 0.380                      | 0.052        |       |
| 10 |             |                             | rs6589377  | 112860946  | G         | 0.17 | 0.286 | 0.617                     | 0.061                     | 0.552                      | 0.502                      | 0.915        |       |
| 11 |             |                             |            |            |           |      |       |                           |                           |                            |                            |              |       |
| 12 |             |                             |            |            |           |      |       |                           |                           |                            |                            |              |       |
| 13 |             |                             |            |            |           |      |       |                           |                           |                            |                            |              |       |
| 14 |             |                             |            |            |           |      |       |                           |                           |                            |                            |              |       |
| 15 | <i>DRD3</i> | <i>Dopamine receptor D3</i> | 3          | rs2087017  | 115324703 | G    | 0.43  | 0.937                     | 0.921                     | 0.606                      | 0.743                      | 0.835        | 0.828 |
| 16 |             |                             |            | rs2134655  | 115340891 | A    | 0.28  | 0.454                     | 0.554                     | 0.129                      | 0.507                      | 0.209        | 0.330 |
| 17 |             |                             |            | rs963468   | 115345577 | A    | 0.38  | 0.809                     | 0.777                     | 0.902                      | 0.608                      | 0.609        | 0.580 |
| 18 |             |                             |            | rs3773678  | 115352768 | A    | 0.06  | 0.780                     | 0.855                     | 0.487                      | 0.770                      | 0.972        | 0.556 |
| 19 |             |                             |            | rs2630351  | 115357749 | A    | 0.03  | 0.954                     | 0.144                     | 0.168                      | 0.999                      | 0.811        | 0.211 |
| 20 |             |                             |            | rs167771   | 115358965 | G    | 0.18  | 0.862                     | 0.638                     | 0.406                      | 0.514                      | 0.416        | 0.966 |
| 21 |             |                             |            | rs167770   | 115362252 | G    | 0.31  | 0.260                     | 0.911                     | 0.298                      | 0.694                      | 0.593        | 0.982 |
| 22 |             |                             |            | rs226082   | 115363703 | G    | 0.31  | 0.261                     | 0.911                     | 0.301                      | 0.690                      | 0.594        | 0.983 |
| 23 |             |                             |            | rs324029   | 115364313 | A    | 0.31  | 0.259                     | 0.913                     | 0.296                      | 0.722                      | 0.593        | 0.964 |
| 24 |             |                             |            | rs10934256 | 115368342 | A    | 0.17  | 0.229                     | 0.898                     | 0.478                      | 0.246                      | 0.147        | 0.669 |
| 25 |             |                             |            | rs1486009  | 115371222 | G    | 0.12  | 0.721                     | 0.667                     | 0.745                      | 0.571                      | 0.387        | 0.600 |
| 26 |             |                             |            | rs6280     | 115373505 | G    | 0.33  | 0.159                     | 0.485                     | 0.141                      | 0.667                      | 0.386        | 0.880 |
| 27 |             |                             |            | rs9825563  | 115382910 | G    | 0.23  | <b>0.045</b> <sup>7</sup> | 0.902                     | 0.211                      | 0.215                      | <b>0.028</b> | 0.927 |
| 28 |             |                             |            |            |           |      |       |                           |                           |                            |                            |              |       |
| 29 |             |                             |            |            |           |      |       |                           |                           |                            |                            |              |       |
| 30 |             |                             |            |            |           |      |       |                           |                           |                            |                            |              |       |
| 31 |             |                             |            |            |           |      |       |                           |                           |                            |                            |              |       |
| 32 |             |                             |            |            |           |      |       |                           |                           |                            |                            |              |       |
| 33 | <i>DRD4</i> | <i>Dopamine receptor D4</i> | 11         | rs3758653  | 626399    | G    | 0.23  | 0.300                     | 0.752                     | 0.249                      | 0.980                      | 0.322        | 0.905 |
| 34 |             |                             |            | rs11246226 | 631191    | A    | 0.49  | 0.749                     | 0.748                     | 0.166                      | 0.925                      | 0.908        | 0.097 |
| 35 |             |                             |            |            |           |      |       |                           |                           |                            |                            |              |       |
| 36 |             |                             |            |            |           |      |       |                           |                           |                            |                            |              |       |
| 37 |             |                             |            |            |           |      |       |                           |                           |                            |                            |              |       |
| 38 | <i>DRD5</i> | <i>Dopamine receptor D5</i> | 4          | rs1878943  | 9375986   | A    | 0.21  | 0.586                     | 0.686                     | 0.482                      | 0.386                      | 0.988        | 0.605 |
| 39 |             |                             |            | rs13106539 | 9406801   | G    | 0.39  | 0.735                     | 0.062                     | 0.067                      | <b>0.044</b> <sup>14</sup> | 0.532        | 0.384 |
| 40 |             |                             |            |            |           |      |       |                           |                           |                            |                            |              |       |
| 41 |             |                             |            |            |           |      |       |                           |                           |                            |                            |              |       |
| 42 |             |                             |            |            |           |      |       |                           |                           |                            |                            |              |       |
| 43 |             |                             |            |            |           |      |       |                           |                           |                            |                            |              |       |
| 44 |             |                             |            |            |           |      |       |                           |                           |                            |                            |              |       |
| 45 |             |                             |            |            |           |      |       |                           |                           |                            |                            |              |       |
| 46 |             |                             |            |            |           |      |       |                           |                           |                            |                            |              |       |
| 47 |             |                             |            |            |           |      |       |                           |                           |                            |                            |              |       |

1  
2  
3  
4 <sup>1</sup> Defined by the presence of two out of three possible indicators for the early developmental risk environment: low birth weight, late motor  
5 development, and late development of speech.

6 <sup>2</sup> Defined by the presence of two out of five possible indicators for the social risk environment: unwantedness of pregnancy, low socio-economic  
7 status, single parenthood, low level of education of mother, and low activity for information retrieval by the mother.

8 <sup>3</sup> Minor allele frequency.

9 <sup>4</sup>  $P=0.0364$  ( $\beta=0.0414$ ), <sup>5</sup>  $P=0.008$  ( $\beta =0.0440$ ), <sup>6</sup>  $P=0.042$  ( $\beta =0.0320$ ) and <sup>7</sup>  $P=0.022$  ( $\beta =-0.0396$ ) in individuals with high risk environment; <sup>8</sup>  $P>0.05$   
10 in both genders; <sup>9</sup>  $P=0.0006$  ( $\beta=0.023$ ) in males; <sup>10</sup>  $\beta=0.008$ , <sup>11</sup>  $\beta=0.012$ , <sup>12</sup>  $\beta=0.011$ , <sup>13</sup>  $\beta=0.022$ , <sup>14</sup>  $\beta=-0$ .

**Table 3.** Haplotype analysis of *COMT* variants on current depressive symptoms (HSCL score) in individuals with high early developmental risk ( $E_{Dev}$ )<sup>1</sup> from the NFBC 1966. Empirical P-values based on permutation are reported, with P-values <0.05 shown in bold.

| Gene        | Variant                         | Haplotype                       | Frequency | Males and females with high risk $E_{Dev}$ |               | Males with high risk $E_{Dev}$ |               | Females with high risk $E_{Dev}$ |         |        |  |
|-------------|---------------------------------|---------------------------------|-----------|--------------------------------------------|---------------|--------------------------------|---------------|----------------------------------|---------|--------|--|
|             |                                 |                                 |           | Beta                                       | P             | Beta                           | P             | Beta                             | P       |        |  |
| <i>COMT</i> | <i>2-SNP haplotype analysis</i> |                                 |           |                                            |               |                                |               |                                  |         |        |  |
|             |                                 | rs5993883-rs2239393             | CG        | 0.21                                       | 0.0552        | <b>0.0049</b>                  | 0.0828        | <b>0.0040</b>                    | 0.0216  | 0.4420 |  |
|             |                                 | rs2239393-rs4680                | GG        | 0.32                                       | 0.0440        | <b>0.0072</b>                  | 0.0720        | <b>0.0037</b>                    | 0.0119  | 0.4914 |  |
|             |                                 |                                 | AA        | 0.55                                       | -0.0320       | <b>0.0428</b>                  | -0.0411       | 0.0827                           | -0.0207 | 0.3370 |  |
|             |                                 | rs4680-rs4646316                | GA        | 0.17                                       | 0.0434        | <b>0.0331</b>                  | 0.0624        | <b>0.0226</b>                    | 0.0206  | 0.3950 |  |
|             |                                 | <i>3-SNP haplotype analysis</i> |           |                                            |               |                                |               |                                  |         |        |  |
|             |                                 | rs5993883-rs2239393-rs4680      | CGG       | 0.21                                       | 0.0548        | <b>0.0046</b>                  | 0.0826        | <b>0.0053</b>                    | 0.0211  | 0.4569 |  |
|             | rs2239393-rs4680-rs4646316      | GGA                             | 0.17      | 0.0433                                     | <b>0.0344</b> | 0.0614                         | <b>0.0258</b> | 0.0213                           | 0.4311  |        |  |

<sup>1</sup> Defined by the presence of two out of three possible indicators for the early developmental risk environment: low birth weight, late motor development, and late development of speech.

**Table 4.** Haplotype analysis of *DRD2* variants on current depressive symptoms (HSCL score) in the complete sample from the NFBC 1966. Empirical P-values based on permutation are reported, with P-values <0.05 shown in bold.

| Gene                          | Variant                         | Haplotype | Frequency | Males and females |               | Males         |                |
|-------------------------------|---------------------------------|-----------|-----------|-------------------|---------------|---------------|----------------|
|                               |                                 |           |           | Beta              | P             | Beta          | P              |
| <i>DRD2</i>                   | <i>2-SNP haplotype analysis</i> |           |           |                   |               |               |                |
|                               | rs4648318-rs4274224             | GG        | 0.05      | 0.0409            | <b>0.0007</b> | 0.0694        | <b>0.00005</b> |
|                               | rs4274224-rs4581480             | GG        | 0.07      | 0.0220            | <b>0.0069</b> | 0.0321        | <b>0.0023</b>  |
|                               |                                 | AA        | 0.48      | 0.0116            | <b>0.0161</b> | -0.0237       | <b>0.0004</b>  |
|                               | rs4581480-rs7131056             | GA        | 0.07      | 0.0220            | <b>0.0071</b> | 0.0322        | <b>0.0026</b>  |
|                               | <i>3-SNP haplotype analysis</i> |           |           |                   |               |               |                |
|                               | rs4648318-rs4274224-rs4581480   | GGG       | 0.05      | 0.0326            | <b>0.0027</b> | 0.0437        | <b>0.0019</b>  |
| rs4274224-rs4581480-rs7131056 | GGA                             | 0.07      | 0.0215    | <b>0.0081</b>     | 0.0317        | <b>0.0033</b> |                |

**Table 5.** Haplotype analysis of *COMT* and *DRD2* variants on other neurobehavioral traits in the NFBC1966. Empirical P-values based on permutation are reported, with P-values <0.05 shown in bold.

| Gene        | Variant                         | Group     | Gender | HSCL(total) |                | HSCL(depression) |               | HSCL(anxiety) |               | Depression diagnosis |        | Harm avoidance |         |
|-------------|---------------------------------|-----------|--------|-------------|----------------|------------------|---------------|---------------|---------------|----------------------|--------|----------------|---------|
|             |                                 |           |        | Beta        | P              | Beta             | P             | Beta          | P             | Odds ratio           | P      | Beta           | P       |
| <i>COMT</i> | rs737866                        | High risk | Males  | 0.0640      | <b>0.0254</b>  | 0.0440           | 0.2239        | 0.0150        | 0.6157        | 0.7130               | 0.5004 | 0.7820         | 0.3799  |
|             | rs5993883-<br>rs2239393<br>(CG) | High risk | Males  | 0.0830      | <b>0.0040</b>  | 0.0750           | <b>0.0176</b> | 0.0200        | 0.2877        | 0.2100               | 0.1506 | 1.2040         | 0.1433  |
| <i>DRD2</i> | rs4648318-<br>rs4274224<br>(GG) | All       | Males  | 0.0694      | <b>0.00005</b> | 0.0600           | <b>0.0015</b> | 0.0326        | <b>0.0212</b> | 0.8280               | 0.6798 | 1.0430         | 0.07009 |



STROBE 2007 (v4) Statement—Checklist of items that should be included in reports of cohort studies

| Section/Topic                | Item # | Recommendation                                                                                                                                                                       | Reported on page # |
|------------------------------|--------|--------------------------------------------------------------------------------------------------------------------------------------------------------------------------------------|--------------------|
| Title and abstract           | 1      | (a) Indicate the study’s design with a commonly used term in the title or the abstract                                                                                               | 1                  |
|                              |        | (b) Provide in the abstract an informative and balanced summary of what was done and what was found                                                                                  | 3-4                |
| <b>Introduction</b>          |        |                                                                                                                                                                                      |                    |
| Background/rationale         | 2      | Explain the scientific background and rationale for the investigation being reported                                                                                                 | 6-7                |
| Objectives                   | 3      | State specific objectives, including any prespecified hypotheses                                                                                                                     | 7-8                |
| <b>Methods</b>               |        |                                                                                                                                                                                      |                    |
| Study design                 | 4      | Present key elements of study design early in the paper                                                                                                                              | 8                  |
| Setting                      | 5      | Describe the setting, locations, and relevant dates, including periods of recruitment, exposure, follow-up, and data collection                                                      | 8-11               |
| Participants                 | 6      | (a) Give the eligibility criteria, and the sources and methods of selection of participants. Describe methods of follow-up                                                           | 8-11               |
|                              |        | (b) For matched studies, give matching criteria and number of exposed and unexposed                                                                                                  |                    |
| Variables                    | 7      | Clearly define all outcomes, exposures, predictors, potential confounders, and effect modifiers. Give diagnostic criteria, if applicable                                             | 8-11               |
| Data sources/<br>measurement | 8*     | For each variable of interest, give sources of data and details of methods of assessment (measurement). Describe comparability of assessment methods if there is more than one group | 8-11               |
| Bias                         | 9      | Describe any efforts to address potential sources of bias                                                                                                                            | 8-11               |
| Study size                   | 10     | Explain how the study size was arrived at                                                                                                                                            | 8-11               |
| Quantitative variables       | 11     | Explain how quantitative variables were handled in the analyses. If applicable, describe which groupings were chosen and why                                                         | 12-13              |
| Statistical methods          | 12     | (a) Describe all statistical methods, including those used to control for confounding                                                                                                | 12-13              |
|                              |        | (b) Describe any methods used to examine subgroups and interactions                                                                                                                  | 12-13              |
|                              |        | (c) Explain how missing data were addressed                                                                                                                                          |                    |
|                              |        | (d) If applicable, explain how loss to follow-up was addressed                                                                                                                       |                    |
|                              |        | (e) Describe any sensitivity analyses                                                                                                                                                |                    |
| <b>Results</b>               |        |                                                                                                                                                                                      |                    |

|                          |     |                                                                                                                                                                                                              |           |
|--------------------------|-----|--------------------------------------------------------------------------------------------------------------------------------------------------------------------------------------------------------------|-----------|
| Participants             | 13* | (a) Report numbers of individuals at each stage of study—eg numbers potentially eligible, examined for eligibility, confirmed eligible, included in the study, completing follow-up, and analysed            | 8-11      |
|                          |     | (b) Give reasons for non-participation at each stage                                                                                                                                                         | 8-11      |
|                          |     | (c) Consider use of a flow diagram                                                                                                                                                                           |           |
| Descriptive data         | 14* | (a) Give characteristics of study participants (eg demographic, clinical, social) and information on exposures and potential confounders                                                                     | 8-11      |
|                          |     | (b) Indicate number of participants with missing data for each variable of interest                                                                                                                          | 8-11      |
|                          |     | (c) Summarise follow-up time (eg, average and total amount)                                                                                                                                                  | 8-11      |
| Outcome data             | 15* | Report numbers of outcome events or summary measures over time                                                                                                                                               | 8-13      |
| Main results             | 16  | (a) Give unadjusted estimates and, if applicable, confounder-adjusted estimates and their precision (eg, 95% confidence interval). Make clear which confounders were adjusted for and why they were included | 13-18     |
|                          |     | (b) Report category boundaries when continuous variables were categorized                                                                                                                                    |           |
|                          |     | (c) If relevant, consider translating estimates of relative risk into absolute risk for a meaningful time period                                                                                             |           |
| Other analyses           | 17  | Report other analyses done—eg analyses of subgroups and interactions, and sensitivity analyses                                                                                                               | 13-18     |
| <b>Discussion</b>        |     |                                                                                                                                                                                                              |           |
| Key results              | 18  | Summarise key results with reference to study objectives                                                                                                                                                     | 18-22, 24 |
| <b>Limitations</b>       |     |                                                                                                                                                                                                              |           |
| Interpretation           | 20  | Give a cautious overall interpretation of results considering objectives, limitations, multiplicity of analyses, results from similar studies, and other relevant evidence                                   | 22-24     |
| Generalisability         | 21  | Discuss the generalisability (external validity) of the study results                                                                                                                                        | 24        |
| <b>Other information</b> |     |                                                                                                                                                                                                              |           |
| Funding                  | 22  | Give the source of funding and the role of the funders for the present study and, if applicable, for the original study on which the present article is based                                                | 24-25     |

\*Give information separately for cases and controls in case-control studies and, if applicable, for exposed and unexposed groups in cohort and cross-sectional studies.

**Note:** An Explanation and Elaboration article discusses each checklist item and gives methodological background and published examples of transparent reporting. The STROBE checklist is best used in conjunction with this article (freely available on the Web sites of PLoS Medicine at <http://www.plosmedicine.org/>, Annals of Internal Medicine at <http://www.annals.org/>, and Epidemiology at <http://www.epidem.com/>). Information on the STROBE Initiative is available at [www.strobe-statement.org](http://www.strobe-statement.org).

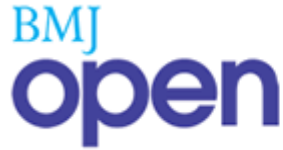

**Interaction of Early Environment, Gender and Genes of Monoamine Neurotransmission in the Etiology of Depression in a Large Population-Based Finnish Birth Cohort**

|                                 |                                                                                                                                                                                                                                                                                                                                                                                                                                                                                                                                                                                                                                                                                                                                                                                                                                                                                                                                                                                                                                                                                                                                                                                                                                                                                                                                                                                                                                                                                                                                                                                                                                                                                                                                                                                                                                                                                                     |
|---------------------------------|-----------------------------------------------------------------------------------------------------------------------------------------------------------------------------------------------------------------------------------------------------------------------------------------------------------------------------------------------------------------------------------------------------------------------------------------------------------------------------------------------------------------------------------------------------------------------------------------------------------------------------------------------------------------------------------------------------------------------------------------------------------------------------------------------------------------------------------------------------------------------------------------------------------------------------------------------------------------------------------------------------------------------------------------------------------------------------------------------------------------------------------------------------------------------------------------------------------------------------------------------------------------------------------------------------------------------------------------------------------------------------------------------------------------------------------------------------------------------------------------------------------------------------------------------------------------------------------------------------------------------------------------------------------------------------------------------------------------------------------------------------------------------------------------------------------------------------------------------------------------------------------------------------|
| Journal:                        | <i>BMJ Open</i>                                                                                                                                                                                                                                                                                                                                                                                                                                                                                                                                                                                                                                                                                                                                                                                                                                                                                                                                                                                                                                                                                                                                                                                                                                                                                                                                                                                                                                                                                                                                                                                                                                                                                                                                                                                                                                                                                     |
| Manuscript ID:                  | bmjopen-2011-000087.R2                                                                                                                                                                                                                                                                                                                                                                                                                                                                                                                                                                                                                                                                                                                                                                                                                                                                                                                                                                                                                                                                                                                                                                                                                                                                                                                                                                                                                                                                                                                                                                                                                                                                                                                                                                                                                                                                              |
| Article Type:                   | Research                                                                                                                                                                                                                                                                                                                                                                                                                                                                                                                                                                                                                                                                                                                                                                                                                                                                                                                                                                                                                                                                                                                                                                                                                                                                                                                                                                                                                                                                                                                                                                                                                                                                                                                                                                                                                                                                                            |
| Date Submitted by the Author:   | 24-Jun-2011                                                                                                                                                                                                                                                                                                                                                                                                                                                                                                                                                                                                                                                                                                                                                                                                                                                                                                                                                                                                                                                                                                                                                                                                                                                                                                                                                                                                                                                                                                                                                                                                                                                                                                                                                                                                                                                                                         |
| Complete List of Authors:       | <p>Nyman, Emma; Institute for Molecular Medicine Finland FIMM, University of Helsinki and National Institute for Health and Welfare, Public Health Genomics Unit</p> <p>Sulkava, Sonja; Institute for Molecular Medicine Finland FIMM, University of Helsinki and National Institute for Health and Welfare, Public Health Genomics Unit; Helsinki University Central Hospital, Department of Psychiatry</p> <p>Soronen, Pia; Institute for Molecular Medicine Finland FIMM, University of Helsinki and National Institute for Health and Welfare, Public Health Genomics Unit</p> <p>Miettunen, Jouko; Department of Psychiatry, University of Oulu and Oulu University Hospital, Oulu; Academy of Finland</p> <p>Loukola, Anu; Institute for Molecular Medicine Finland FIMM, University of Helsinki and National Institute for Health and Welfare, Public Health Genomics Unit</p> <p>Leppä, Virpi; University of Helsinki, Institute for Molecular Medicine Finland (FIMM); University of Helsinki, Helsinki Biomedical Graduate School</p> <p>Joukamaa, Matti; University of Tampere, Tampere School of Public Health</p> <p>Mäki, Pirjo; University of Oulu and Oulu University Hospital, Department of Psychiatry</p> <p>Järvelin, Marjo-Riitta; Institute of Health Sciences, University of Oulu</p> <p>Freimer, Nelson; University of California, Los Angeles, Semel Institute for Neuroscience and Human Behavior</p> <p>Peltonen, Leena; Institute for Molecular Medicine Finland FIMM, University of Helsinki and National Institute for Health and Welfare, Public Health Genomics Unit</p> <p>Veijola, Juha; University of Oulu and Oulu University Hospital, Department of Psychiatry; Academy of Finland</p> <p>Paunio, Tiina; Institute for Molecular Medicine Finland FIMM, University of Helsinki and National Institute for Health and Welfare, Public Health Genomics Unit</p> |
| <b>Primary Subject Heading</b>: | Genetics                                                                                                                                                                                                                                                                                                                                                                                                                                                                                                                                                                                                                                                                                                                                                                                                                                                                                                                                                                                                                                                                                                                                                                                                                                                                                                                                                                                                                                                                                                                                                                                                                                                                                                                                                                                                                                                                                            |

1  
2  
3  
4  
5  
6  
7  
8  
9  
10  
11  
12  
13  
14  
15  
16  
17  
18  
19  
20  
21  
22  
23  
24  
25  
26  
27  
28  
29  
30  
31  
32  
33  
34  
35  
36  
37  
38  
39  
40  
41  
42  
43  
44  
45  
46  
47  
48  
49  
50  
51  
52  
53  
54  
55  
56  
57  
58  
59  
60

|           |                                                                |
|-----------|----------------------------------------------------------------|
| Keywords: | PSYCHIATRY, Depression & mood disorders < PSYCHIATRY, GENETICS |
|           |                                                                |

SCHOLARONE™  
Manuscripts

For peer review only

# Interaction of Early Environment, Gender and Genes of Monoamine Neurotransmission in the Etiology of Depression in a Large Population-Based Finnish Birth Cohort

Emma S. Nyman, M.Sc.,<sup>1,2</sup> Sonja Sulkava,<sup>1,3</sup> Pia Soronen, M.Sc.,<sup>1</sup>  
Jouko Miettunen, Ph.D.,<sup>4,5</sup> Anu Loukola, Ph.D.,<sup>1</sup> Virpi Leppä, M.Sc.,<sup>1,2</sup>  
Matti Joukamaa, M.D., Ph.D.,<sup>6,7</sup> Pirjo Mäki, M.D., Ph.D.,<sup>4</sup> Marjo-Riitta  
Järvelin, M.D., Ph.D.,<sup>8,9,10</sup> Nelson Freimer, M.D.,<sup>11</sup> Leena Peltonen,  
M.D., Ph.D.<sup>1,2,12,13</sup> Juha Veijola, MD, Ph.D.,<sup>4,5</sup> Tiina Paunio M.D.,  
Ph.D.,<sup>1,3</sup> \*

<sup>1</sup> Public Health Genomics Unit, Institute for Molecular Medicine Finland FIMM, University of Helsinki and National Institute for Health and Welfare, Helsinki, Finland

<sup>2</sup> Department of Medical Genetics, University of Helsinki, Helsinki, Finland

<sup>3</sup> Department of Psychiatry, Helsinki University Central Hospital, Helsinki, Finland

<sup>4</sup> Department of Psychiatry, University of Oulu and Oulu University Hospital, Oulu, Finland

<sup>5</sup> Academy of Finland, Helsinki, Finland

1  
2  
3  
4  
5  
6  
7  
8  
9  
10  
11  
12  
13  
14  
15  
16  
17  
18  
19  
20  
21  
22  
23  
24  
25  
26  
27  
28  
29  
30  
31  
32  
33  
34  
35  
36  
37  
38  
39  
40  
41  
42  
43  
44  
45  
46  
47  
48  
49  
50  
51  
52  
53  
54  
55  
56  
57  
58  
59  
60

<sup>6</sup> Tampere School of Public Health, University of Tampere, Tampere, Finland

<sup>7</sup> Department of Psychiatry, Tampere University Hospital, Tampere, Finland

<sup>8</sup> Institute of Health Sciences, University of Oulu, Oulu, Finland

<sup>9</sup> Department of Epidemiology and Public Health, Imperial College, London, UK

<sup>10</sup> Department of Child and Adolescent Health, National Public Health Institute, Helsinki, Finland

<sup>11</sup> Semel Institute for Neuroscience and Human Behavior, University of California, Los Angeles, CA, USA

<sup>12</sup> Program in Medical and Population Genetics, The Broad Institute of MIT and Harvard, Cambridge, MA, USA

<sup>13</sup> Wellcome Trust Sanger Institute, Cambridge, UK

\* Correspondence and reprint requests: Dr. Tiina Paunio, Institute for Molecular Medicine Finland FIMM, University of Helsinki and National Institute for Health and Welfare, P.O.Box 212, FI-00251 Helsinki, Finland. Tel: +358 (0)50 350 7936, Fax: +358 (0)20 610 8480 Helsinki, Email: tiina.paunio@thl.fi.

Key words: Environment, Monoamine, Gene, Depression, Cohort Study

Word count text: 4333

Word count abstract: 236

## ABSTRACT

**Objectives** Depression is a worldwide leading cause of morbidity and disability. Genetic studies have recently begun to elucidate its molecular etiology. We investigated candidate genes of monoamine neurotransmission and early environmental risk factors for depressiveness in the genetically isolated population-based Northern Finland Birth Cohort 1966 (12058 live births).

**Design** We ascertained and subdivided the study sample (n=5225) based on measures of early development, and of social environment, and examined candidate genes of monoamine neurotransmission, many of which have shown prior evidence of gene-environment interaction (GxE) for affective disorders, namely *SLC6A4*, *TPH2*, *COMT*, *MAOA*, and the dopamine receptor genes *DRD1-DRD5*.

**Results and Conclusion** We observed no major genetic effects of the analyzed variants on depressiveness. However, when measures of early development and of social environment were considered, some evidence of interaction was observed. Allelic variants of *COMT* interacted with high early developmental risk (P=0.005 for rs2239393 and P=0.02 for rs4680) so that the association with depression was detected only in individuals of high developmental risk group (P=0.0046 and  $\beta=0.056$  for rs5993883-rs2239393-rs4680 risk haplotype CGG including Val158), particularly in males (P=0.0053 and  $\beta=0.083$  for the haplotype CGG). Rs4274224 from *DRD2* interacted with gender (P=0.017) showing significant association with depressiveness in males (P=0.0006 and  $\beta=0.0023$ ;

Deleted: al

Deleted: risk

Deleted: s

Deleted: specific environmental factors

Deleted:

Deleted: environment

1  
2 P=0.00005 and  $\beta=0.069$  for rs4648318-rs4274224 haplotype GG). Our results  
3  
4 support the role of genes of monoamine neurotransmission in the etiology of  
5  
6 depression conditional on environmental risk and sex, but not direct major effects  
7  
8 of monoaminergic genes in this unselected population.  
9

## 10 11 12 13 14 ARTICLE SUMMARY

### 15 16 17 18 Article focus

- 19 - Impact on depression of monoaminergic candidate genes with prior  
20 evidence of gene-environment interaction for affective disorders, and of  
21 dopamine receptor genes  
22
- 23 - Gene-environment and gene-gender interaction in the etiology of  
24 depression  
25
- 26 - Effect of measures of early development, and of social environment on  
27 depression  
28  
29

Deleted: neuro

Deleted: al

Deleted: risk

Deleted: s

### 30 31 32 33 34 Key messages

- 35 - Genes of monoamine neurotransmission play a role in the etiology of  
36 depression conditional on environmental risk, especially in males and in  
37 individuals of high early developmental risk group; in particular there is  
38 evidence of an Interaction with a *COMT* high risk haplotype including  
39 Val158  
40  
41
- 42 - Gender-specific mechanisms and responses to environmental effectors  
43 are evident in regulation of mood  
44  
45  
46  
47  
48  
49

Deleted: from an

Deleted: environment



**Strengths and limitations of this study** Depression as defined does not necessary imply clinical diagnosis of major depression, but instead is based on self-report or on the score from the HSCL measure. Despite this limitation, the prevalence of depressed mood was in the same range as in earlier reports. There was a notable drop-out rate among the original material of all cohort members, and about half of the original cohort members did not participate in this study. Measures of early development and of social environment were chosen to reflect risk as precisely as possible, however, the choice was limited by the availability of variables collected. Advantages of this study include the availability of longitudinal follow-up data starting antenatally, enabling inclusion of the environmental dimension without risk of recall bias. Another advantage is the unique genetic structure of the study cohort, characterized by isolation, founder effect, multiple bottlenecks and more genetic homogeneity compared to many other isolates, permitting identification of genetic risk loci that may be missed when using more heterogeneous populations. The subjects were also representative of the population, with all cohort members born in the same year and within a geographically defined area. The size of the study sample is sufficient for identifying genetic variants of moderate impact. Both genders are also represented in almost equal amounts, which is notable since gender differences are evident in both depression and related temperament traits, such as Harm avoidance. Finally, it is also beneficial that the sample is a one-year birth cohort, as it is well established that some psychiatric traits, such as Harm

Deleted: arkens

Deleted: al

Deleted: s

Deleted: l

1  
2  
3  
4  
5  
6  
7  
8  
9  
10  
11  
12  
13  
14  
15  
16  
17  
18  
19  
20  
21  
22  
23  
24  
25  
26  
27  
28  
29  
30  
31  
32  
33  
34  
35  
36  
37  
38  
39  
40  
41  
42  
43  
44  
45  
46  
47  
48  
49  
50  
51  
52  
53  
54  
55  
56  
57  
58  
59  
60

avoidance are age-dependent. The genetic effects may therefore be isolated  
from the effects of aging.

**Deleted:** Finally, a complete coverage of the major candidate genes that are relevant with the present focus is provided.

For peer review only

## INTRODUCTION

Depression is a major cause of morbidity worldwide, major depression affecting 5-7% of the population annually and 16% over the lifetime.[1] Although a genetic component in the etiology of major depression is evident with a 40-50% heritability,[2] the predisposing genetic background has so far remained largely undefined, and recent findings from genome-wide association studies also point to a complex underlying architecture.[3] Depressed patients frequently exhibit comorbidities such as anxiety and alcohol abuse,[4] and certain personality types[5-7] have been associated with depression proneness.

Environmental risk factors, in particular stressors influencing during development,[8] are considered to have a significant impact on the development and course of depression. It is likely that many of the genetic risk factors for depression interact with the early developmental environment, but recapture of these interactions has remained a challenge for etiological studies of depression. Although the interplay between genes and environment has been investigated with respect to several psychiatric disorders[9, 10] including depression, this vast subject remains still to a large extent unexplored. On the other hand, addressing the effects of genes and environment on psychiatric morbidity enables us to examine the two main constituents in their etiology. Therefore, we wanted to include the environmental dimension in our study in order to also explore gene-environment interactions (GxE).

1  
2  
3  
4  
5 According to the monoamine hypothesis, depression is caused by underactivity  
6 in brain monoamines, such as dopamine, serotonin, and norepinephrine.[11]  
7  
8 Recent results of neuroimaging studies have provided further support for this  
9 theory.[12] The most solid evidence from candidate gene studies has perhaps  
10 been obtained for the interaction of the *SLC6A4* gene for serotonin transporter  
11 and stressful early and current life events,[13] including positive results from a  
12 recent review[14] and meta-analysis of all studies to date[15], although there are  
13 also contradicting results.[16] Other robust genetic findings have been obtained  
14 on the *COMT* gene for catechol-O-methyltransferase, an enzyme catabolising  
15 catecholamines such as dopamine and noradrenaline, which has been implicated  
16 in depression in conjunction with stress,[17] and on the *MAOA* gene for  
17 monoamine oxidase A, an enzyme oxidizing neurotransmitter and dietary  
18 monoamines such as serotonin, noradrenaline and dopamine, which has been  
19 associated with depression in interaction with severity of maltreatment in  
20 childhood.[17] Furthermore, *TPH2* gene for tryptophan hydroxylase 2, which is  
21 the brain-specific form of the key enzyme in serotonin synthesis, has been  
22 implicated to interact with stress on disorders of cognitive control and emotional  
23 regulation, including depression.[18] Within the dopamine transmission the *DRD2*  
24 gene for dopamine receptor D2 has been associated with depressiveness and  
25 anxiety, combined with an effect of parenting in childhood,[19] and the *DRD4*  
26 gene for dopamine receptor D4 has been associated with increased risk for  
27 obesity in women with seasonal affective disorder.[20] Thus, genes from the  
28  
29  
30  
31  
32  
33  
34  
35  
36  
37  
38  
39  
40  
41  
42  
43  
44  
45  
46  
47  
48  
49  
50

1  
2 monoamine neurotransmission system are among the most thoroughly studied in  
3 psychiatric genetics and in particular in the etiology of mood disorders, and have  
4 provided perhaps the most robust evidence so far for interaction with various  
5 types of risk environments, including childhood environment.  
6  
7  
8  
9

10  
11  
12  
13  
14 We chose to include these candidate genes of monoamine neurotransmission  
15 [showing prior evidence of gene-environment interaction](#), including *SLC6A4*,  
16 *TPH2*, *COMT*, *MAOA*, as well as the dopamine receptor genes *DRD1-DRD5*, in  
17 our study on the etiology of depression with a particular focus on their interaction  
18 with available markers reflecting [measures of](#) early development, [and of](#) social  
19 environment. The study was performed in a sample of 5225 individuals from a  
20 large Finnish isolated population cohort. As gender is an important confounder  
21 for depression and at least some of the genetic liability is gender-specific,[2] we  
22 also examined gene-gender interactions in this sample.  
23  
24  
25  
26  
27  
28  
29  
30  
31  
32  
33  
34  
35  
36

Deleted: al

Deleted: risk

Deleted: s

## 37 METHODS

### 40 Setting

41  
42 We utilized the genetically isolated Northern Finland Birth Cohort (NFBC 1966) to  
43 investigate effects of candidate genes and environmental risk factors during the  
44  
45  
46  
47  
48  
49  
50  
51  
52  
53  
54  
55  
56  
57  
58  
59  
60

1  
2 development on depressiveness. We subdivided the study sample based on  
3  
4 measures of early development arising from the fetal growth environment and  
5  
6 neurological development during the first year of life (measure of early  
7  
8 development) as well as from the family environment during pregnancy and early  
9  
10 childhood (measure of social environment). We examined interactions of these  
11  
12 measures with candidate genes of the monoamine neurotransmitter systems,  
13  
14 which have prior evidence of gene-environment interaction on affective disorders,  
15  
16 namely *SLC6A4*, *TPH2*, *COMT*, *MAOA*, and the dopamine receptor genes  
17  
18 *DRD1-DRD5*.  
19

Deleted: al risk factors

Deleted: al risk environment

Deleted: risk

Deleted: environments

Deleted: many of

### Study subjects

20  
21  
22  
23  
24  
25  
26  
27 The Northern Finland Birth Cohort 1966 (NFBC 1966) is a longitudinal one-year  
28  
29 birth cohort from an unselected population (N=12058 live births) comprising  
30  
31 inhabitants of the two northernmost provinces of Finland.[21] Data collection was  
32  
33 begun during the antenatal period, and follow-up studies have been performed at  
34  
35 the ages of 1, 14 and 31 years. The cohort study has been approved by the  
36  
37 Ethical Committee of Oulu University Faculty of Medicine, and written informed  
38  
39 consent has been obtained from all participants.  
40

41  
42  
43  
44 In 1997 for the 31-year follow-up study[22] all alive cohort members with a known  
45  
46 address (N=11540) were sent a postal questionnaire surveying lifestyle, social  
47  
48 status and health (76% participated), including the Hopkins Symptom Check  
49  
50

1  
2 List-25 (HSCL)[23] and items on self-reported lifetime depression diagnosis (e.g.  
3 “Has your doctor ever diagnosed a depressive disorder?”). Additionally, cohort  
4 members who lived in Northern Finland or had moved to the Helsinki area  
5 (N=8465) were invited to a clinical examination (71% participated) with another  
6 questionnaire to be filled in later and sent to the research group (61%  
7 participated).[24] It included, among others, a validated Finnish translation of  
8 Cloninger’s Temperament and Character Inventory (TCI) questionnaire.[25]  
9  
10  
11  
12  
13  
14  
15  
16  
17  
18

19 Current depressive symptoms were assessed by the HSCL-questionnaire,[26] a  
20 25-item shortened version of an originally 90-item questionnaire. HSCL contains  
21 13-item depression and 10-item anxiety subscales assessing presence and  
22 intensity of depressive and anxiety symptoms during the previous week. Answers  
23 are scored on a scale from 1 (not bothered) to 4 (extremely bothered). The HSCL  
24 total score is the sum of items divided by the number of items answered. We  
25 used mainly HSCL total score as symptoms of depression and anxiety are known  
26 to overlap significantly. In the post hoc analyses, in order to better understand  
27 the original association signals, the separate HSCL subscales for depressive and  
28 anxiety symptoms were also taken into consideration. In addition to current  
29 depressive symptoms (HSCL score) and lifetime (diagnosed) depression, we  
30 used the TCI temperament trait Harm avoidance[5-7] and its subcomponents as  
31 a measure of proneness to depression.  
32  
33  
34  
35  
36  
37  
38  
39  
40  
41  
42  
43  
44  
45  
46  
47  
48  
49  
50  
51  
52  
53  
54  
55  
56  
57  
58  
59  
60

1  
2  
3  
4  
5  
6  
7  
8  
9  
10  
11  
12  
13  
14  
15  
16  
17  
18  
19  
20  
21  
22  
23  
24  
25  
26  
27  
28  
29  
30  
31  
32  
33  
34  
35  
36  
37  
38  
39  
40  
41  
42  
43  
44  
45  
46  
47  
48  
49  
50  
51  
52  
53  
54  
55  
56  
57  
58  
59  
60

The subjects (n=5225; 2509 males, 2716 females; 45 % of the 31 year follow-up study sample or 43% of the original study sample) were divided into high and low risk groups based on the available information reflecting [measures of early neurodevelopment](#), and [of social environment](#) (Table 1). The markers for the [measure of high early developmental risk](#) included 1) low birth weight (<2500 g),[21] considered to reflect suboptimal growth environment during fetal life and to increase risk for somatic and psychiatric diseases such as depression in adulthood,[27] 2) late motor development as reflected by first standing later than at the age of 10 months,[28] and 3) late development of speech, defined by no words at the age of one year.[28] If two out of these risk indicators were present, the subject was classified as having experienced a high risk environment for early brain development. The markers for the [measure of high social risk environment](#) included the occurrence of two or more of the following five indicators for high risk social environment during pregnancy and early childhood: 1) unwantedness of pregnancy (rated by mothers of the cohort members at the sixth or seventh month of pregnancy),[29] 2) low socio-economic status, shown to be linked with depression in the offspring in earlier studies,[30] as defined by father's [occupation](#) at birth (no occupation, unskilled worker, or farmer with area under cultivation under 8 hectares), 3) single parenthood at birth, 4) low level of education of mother (less than nine years of primary school), and 5) low level of information retrieval by the mother related to pregnancy and child care. There was no significant drop-out in either of the high risk groups, as 43% and 41% of

Deleted: al

Deleted: risk

Deleted: s

Deleted: al

Deleted: risk environment

Deleted: s

Deleted: risk

Deleted: social class



1  
2  
3  
4  
5  
6  
7  
8  
9  
10  
11  
12  
13  
14  
15  
16  
17  
18  
19  
20  
21  
22  
23  
24  
25  
26  
27  
28  
29  
30  
31  
32  
33  
34  
35  
36  
37  
38  
39  
40  
41  
42  
43  
44  
45  
46  
47  
48  
49  
50  
51  
52  
53  
54  
55  
56  
57  
58  
59  
60

the individuals of high early developmental and social risk groups, and 47% and 46% of those of the respective low risk groups, were available for study.

Deleted: with

Deleted: risk

Deleted: environments

Deleted: with

Deleted: environments

[Insert Table 1]

### Genotyping methods

We investigated genes relevant within the context of the monoamine hypothesis of depression: *SLC6A4*, *TPH2*, *COMT*, *MAOA*, and the dopamine receptor genes *DRD1-DRD5* (Table 2). The genotyping was performed at the Broad Institute (Cambridge, MA, USA) on the HumanCNV370-duo chip (Illumina, San Diego, CA USA) platform according to the manufacturer's instructions. The analysed SNPs included HapMap tag SNPs (<http://www.hapmap.org/index.html.en>) and were relatively evenly spaced to cover the genes and flanking regions.

[Insert Table 2]

### Statistical analysis

LD structures were determined using HAPLOVIEW. Interaction and association/correlation analyses using linear and logistic regression with permutation was performed using PLINK Software Package Version 1.04, in a step-wise manner to maximize our ability to detect associations and to minimize

1  
2 multiple testing. (i) Primarily analyses were performed to identify genetic risk  
3 variants for current depressive symptoms (HSCL score) interacting with  
4 measures of early development (GxE<sub>Dev</sub>) and of social environment (GxE<sub>Soc</sub>). For  
5  
6  
7  
8 variants giving significant evidence of interaction, we also performed analyses  
9  
10 separately in subgroups of high and low risk, respectively. As gender is an  
11 important confounder for depression and at least some of the genetic liability is  
12 gender-specific,[2] we also examined gene-gender interactions (GxSex). For  
13  
14 variants showing significant evidence of gene-gender interaction, we also  
15  
16 performed analyses separately in males and females. In order to achieve a more  
17  
18 complete view of the effects of the examined genes on depressive symptoms in  
19  
20 the cohort, we also examined their influence on the gender-adjusted HSCL score  
21  
22 in the complete sample regardless of environmental effectors. Finally, we tested  
23  
24 for gene-environment correlations (rGE<sub>Dev</sub> and rG<sub>Soc</sub>) and associations of the risk  
25  
26 environments with the HSCL score (PASW Statistics 18, linear regression  
27  
28 model). (ii) Haplotype analyses were performed when two SNPs located at  
29  
30 physically close vicinity had given association signals of P<0.05 when analyzed  
31  
32 separately. (iii) Genetic variants and haplotypes which had been identified in the  
33  
34 previous analyses were analyzed post hoc with respect to HSCL subscales  
35  
36 (depressive and anxiety symptoms), depression diagnosis and TCI temperament  
37  
38 Harm avoidance. We report point-wise empirical p-values generated by PLINK's  
39  
40 max(T) permutation (10 000 permutations) throughout the manuscript, and  
41  
42 explicitly state where corrected empirical p-values are reported. SNPs with  
43  
44 Hardy-Weinberg Equilibrium p-values <0.05 were excluded from all analyses.  
45  
46  
47  
48  
49  
50  
51  
52  
53  
54  
55  
56  
57  
58  
59  
60

Deleted: al risk

Deleted: risk

Deleted: environments

## RESULTS

### Gene-environment and gene-gender interaction and association analyses in relation to the HSCL score

We examined the effects of nine candidate genes of monoamine neurotransmission on current depressive symptoms (HSCL score) in a longitudinal population-based NFBC 1966 cohort. In particular, we searched for evidence of interaction of variants in these genes with two [measures of early growth](#), one with indicators for potentially disturbed neurobehavioral development ([measure of early development](#)) and the other with risk factors from social environment for normal emotional development ([measure of social environment](#)).

Deleted: environments

Deleted: al risk environment

Deleted: risk

The results are presented in Table 2 in which nominal P-values are reported.

Out of the 69 genetic variants examined, none gave a statistically significant association signal with depressiveness or for an interaction with [measures of early development](#), or [of social environment](#), which would survive correction for multiple testing. We observed nominal evidence for association with the HSCL score ( $P < 0.05$ ) in the complete sample in the cases of rs1487275 in *TPH2*, ( $P = 0.049$ ,  $\beta = 0.008$ ), rs4646316 in *COMT* ( $P = 0.026$ ,  $\beta = 0.012$ ), rs4274224 and rs4581480 in *DRD2* ( $P = 0.022$ ,  $\beta = 0.011$ ; and  $P = 0.009$ ,  $\beta = 0.022$ , respectively),

Deleted: al

Deleted: risk

Deleted: s

1  
2 and rs13106539 in *DRD5* ( $P=0.044$ ,  $\beta=-0.008$ ). Three variants of *COMT* and one  
3  
4 of *DRD3* showed some evidence of interaction ( $P<0.05$ ) with high early  
5  
6 developmental risk with respect to the HSCL score ( $P=0.028$  for rs737866;  
7  
8  $P=0.005$  for rs2239393, and,  $P=0.020$  from rs4680 from *COMT*, and rs9825563,  
9  
10  $P=0.045$  from *DRD3*). All of them were associated with the HSCL score in  
11  
12 individuals of the high risk group ( $P=0.036$ ,  $\beta=0.0414$  for rs737866;  $P=0.008$ ,  
13  
14  $\beta=0.0440$  for rs2239393;  $P=0.042$ ,  $\beta=0.0320$  for rs4680; and  $P=0.022$ ,  $\beta=-0.0396$   
15  
16 for rs9825563, respectively). None of the variants gave any evidence of  
17  
18 interaction with the [measure of social environment in relation to the HSCL score](#).  
19

Deleted: environments

Deleted: risk

20  
21 Five of the genetic variants showed some evidence of interaction with gender  
22  
23 ( $P<0.05$ ), including rs737866 and rs5993883 in *COMT* and rs4274224 in *DRD2*.  
24  
25 Out of these, only rs4274224 associated at  $P<0.05$  with one of the genders  
26  
27 ( $P=0.0006$ ,  $\beta=0.023$  in males). The evidence for gene-environment correlations  
28  
29 (rGE) was observed only nominally about rs1906451 from *TPH2* ( $P=0.035$ ),  
30  
31 rs265973 from *DRD1* ( $P=0.047$ ), and rs9825563 from *DRD3* ( $P=0.028$ ). Despite  
32  
33 a priori evidence for the role of the markers which indicate [high developmental](#)  
34  
35 [risk for psychiatric health and wellbeing, namely low birth weight\[21, 27\] and late](#)  
36  
37 motor or verbal development[28], there was no correlation between these  
38  
39 markers and the HSCL score in the present sample ( $P=0.131$ ), whereas the  
40  
41 social high risk environment, correlated significantly with the score ( $P = 0.00001$ ).  
42  
43  
44

Deleted: a

Deleted: high

Deleted: environment

45 Although none of the association findings of these primary analyses survived  
46  
47 correction for multiple testing, post hoc association analyses in gender groups  
48  
49  
50  
51  
52  
53  
54  
55  
56  
57  
58  
59  
60

1  
2 led to a finding close to statistical significance even when taking into account the  
3 amount of multiple testing performed ( $P=0.0006$  for males with rs4274224 in  
4 *DRD2*). Furthermore, as there was an accumulation of association signals within  
5  
6 *DRD2*). Furthermore, as there was an accumulation of association signals within  
7  
8 two highly plausible candidate genes, *DRD2* and *COMT*, we proceeded to  
9  
10 perform haplotype analyses on these genes in order to better characterize the  
11  
12 allelic variants which yielded the observed suggestive associations, [and to obtain](#)  
13  
14 [a maximal amount of information on the nature of the associations observed.](#)  
15  
16

### 17 18 19 **Haplotype analysis of *COMT* and *DRD2* variants in relation to the HSCL** 20 21 **score**

22  
23  
24 We performed 2-SNP and 3-SNP haplotype analyses combining rs2239393 and  
25  
26 rs4680 from *COMT* and their neighbouring variants using the sliding window  
27  
28 approach. Evidence of association was observed for the rs5993883-rs2239393  
29  
30 haplotype CG spanning a region from the space between LD blocks 1 and 2 to  
31  
32 block 2 of *COMT* (Supplementary figure 1) ( $P=0.0049$ ,  $\beta=0.055$ ), for the  
33  
34 rs2239393-rs4680 haplotype GG in block 2 ( $P=0.0072$ ,  $\beta=0.044$ ), and the  
35  
36 rs5993883-rs2239393-rs4680 haplotype CGG ( $P=0.0046$ ,  $\beta=0.055$ ) in [the](#) high  
37  
38 early developmental risk [group](#), in agreement with analyses using single variants  
39  
40 (Table 3). As rs5993883 from the haplotype had also given evidence of  
41  
42 interaction with gender (Table 2), we further examined haplotype association in  
43  
44 males and females of the high risk group separately. We found that the  
45  
46 haplotypes increased the risk for depressive symptoms in males, but not in  
47  
48  
49  
50  
51  
52  
53  
54  
55  
56  
57  
58  
59  
60

Deleted: individuals

1  
2 females ( $P=0.004$ ,  $\beta=0.083$  for rs5993883-rs2239393 haplotype CG;  $P=0.0037$ ,  
3  $\beta=0.072$  for rs2239393-rs4680 haplotype GG; and  $P=0.0053$ ,  $\beta=0.083$  for  
4 rs5993883-rs2239393-rs4680 haplotype CGG) (Table 3). [As is evident from the](#)  
5 [β-values, each of the haplotypes accounts for more variance in depression than](#)  
6 [any individual constituent SNP.](#)  
7  
8  
9

Formatted: Font color: Auto

10  
11  
12  
13  
14 Haplotype analysis of rs4274224 and rs4581480 from *DRD2*, which gave  
15 suggestive evidence of an association with the HSCL score in the complete  
16 sample, and of their neighbouring variants gave evidence of an association of  
17 rs4648318-rs4274224 haplotype GG spanning from block 2 to block 3 of *DRD2*  
18 ( $P=0.0007$ ,  $\beta=0.041$ ), rs4274224-rs4581480 haplotype GG in block 3 ( $P=0.0069$ ,  
19  $\beta=0.022$ ), and rs4581480-rs7131056 haplotype GA spanning from block 3 to  
20 block 4 ( $P=0.0071$ ,  $\beta=0.022$ ) with the HSCL score. The 3-SNP haplotypes  
21 rs4648318-rs4274224-rs4581480 haplotype GGG ( $P=0.0027$ ,  $\beta=0.032$ ), and  
22 rs4274224-rs4581480-rs7131056 haplotype GGA ( $P=0.0081$ ,  $\beta=0.021$ ), gave  
23 evidence of an association in agreement with the findings from the 2-SNP  
24 haplotypes as well as the single variants (Table 4). As one of the variants  
25 contained within these haplotypes, namely rs4274224, also gave evidence of  
26 interaction with gender as well as association with the HSCL score in males, we  
27 also examined the association in males alone. The association signal became  
28 stronger for all of the risk haplotypes, being strongest for rs4648318-rs4274224  
29 haplotype GG ( $P=0.00005$ ,  $\beta=0.069$ ). [Similarly as for the \*COMT\* haplotypes, the](#)  
30  
31  
32  
33  
34  
35  
36  
37  
38  
39  
40  
41  
42  
43  
44  
45  
46  
47  
48  
49  
50  
51  
52  
53  
54  
55  
56  
57  
58  
59  
60

Formatted: Font: Italic

1  
2  
3  $\beta$ -values, imply that each of the *DRD2* haplotypes accounts for more variance in  
4 depression than any individual constituent SNP.  
5  
6  
7

Formatted: Font: Italic

Formatted: Font color: Auto

8  
9 [Insert Tables 3, 4 and Supplementary figure 1 into the supplementary]  
10

### 11 12 **Haplotype analysis of *COMT* and *DRD2* variants in relation to other** 13 **neurobehavioral traits** 14

15  
16  
17  
18 Encouraged by the findings of the haplotype analyses, we tested for associations  
19 of haplotypes rs5993883-rs2239393 in *COMT* and rs4648318-rs4274224 in  
20 *DRD2*, as well as the single variant rs737866 in *COMT* with other traits related to  
21 depression, including the HSCL depression and anxiety subscales, depression  
22 diagnosis and TCI temperament trait Harm avoidance (Table 5). In both of the  
23 genes, it is evident that the association with HSCL stems mainly from the  
24 subscale which reflects symptoms of depression and not that reflecting anxiety  
25 (with HSCL depression subscale,  $P=0.018$ ,  $\beta=0.075$  for *COMT* haplotype CG and  
26  $P=0.0015$ ,  $\beta=0.060$  for *DRD2* haplotype GG; with HSCL anxiety subscale,  
27  $P=0.288$ ,  $\beta=0.02$  and  $P=0.02$  and  $\beta=0.033$ , respectively). We did not detect any  
28 evidence of an association with depression diagnosis or with Harm avoidance or  
29 its subcomponents.  
30  
31  
32  
33  
34  
35  
36  
37  
38  
39  
40  
41  
42  
43  
44

45 [Insert Table 5]  
46  
47  
48  
49  
50  
51  
52  
53  
54  
55  
56  
57  
58  
59  
60

## DISCUSSION

We investigated genetic and environmental risk factors for depression in a genetically isolated Finnish birth cohort by assessing the relative impacts of monoaminergic candidate genes for depression in groups of contrasting (high and low) early developmental and social risk. We did not observe any robust genetic effects of the analyzed variants on depressiveness. However, when measures of early development and social environment were considered, some signals for association were observed, although none of them survive correction for multiple testing. Our study sample provided modest evidence of an interaction of *COMT* with the measure of high early developmental risk, particularly in males, and a contribution of an allelic variant of *DRD2* to genetic risk for depressiveness particularly in males (Table 2).

Deleted: environments of

Deleted: specific

Deleted: al factors

Deleted: environment

The *COMT* gene encoding for catechol-O-methyltransferase enzyme is among the most investigated genes in psychiatric genetics. The enzyme degrades catecholamine neurotransmitters such as dopamine, noradrenaline and adrenaline by catalyzing the transfer of a methyl group from S-adenosylmethionine to the catecholamines. Its enzymatic activity varies according to a G-to-A transition at codon 158 in the *COMT* gene, resulting in a valine-to-methionine substitution (Val158Met) on the protein level.[31] The enzyme encoded by the Val158 allele has a 3-4 fold higher activity than that



1  
2  
3  
4  
5  
6  
7  
8  
9  
10  
11  
12  
13  
14  
15  
16  
17  
18  
19  
20  
21  
22  
23  
24  
25  
26  
27  
28  
29  
30  
31  
32  
33  
34  
35  
36  
37  
38  
39  
40  
41  
42  
43  
44  
45  
46  
47  
48  
49  
50  
51  
52  
53  
54  
55  
56  
57  
58  
59  
60

encoded by the Met158 allele. Here, we found an association of the haplotype comprising rs5993883 between LD blocks 1 and 2 of *COMT*, as well as rs2239393 and rs4680, which are two variants in virtually complete linkage disequilibrium in block 2, with depressive symptoms in high developmental risk males ( $P=0.0053$ ). The high risk haplotype included the high activity variant Val158 of *COMT*, the allele G of rs4680. This allele has repeatedly been found to be associated with a poor response to pharmacological treatment of depression,[32, 33] and a European multicenter study identified an association between that allele and early onset major depression.[34] The Val158 allele has already earlier been found to associate with cognitive deficits including poor performance in tasks related to higher-order components of processing[35] and perseverative errors, less efficient physiologic responses in the prefrontal cortex,[36] and even schizophrenia based on a meta-analysis,[37] although the effect was not significant when studies with allele frequencies deviating from the Hardy-Weinberg equilibrium were excluded.

In our study we observed evidence for interaction between *COMT* and a [measure of](#) early developmental risk on depressive symptoms. This interaction could not be explained through gene-environment correlations. Nor were we able to detect a significant correlation of the [measure of early](#) developmental risk with depressive symptoms, despite the prior evidence for the role of its markers, which were low birth weight[21, 27] and late motor or verbal development[28], in decreased psychiatric health and wellbeing, including depression. This finding

Deleted: n

Deleted: environment

Deleted: environment

1  
2  
3 may reflect the presence of other environmental risk indicators which were not  
4 examined in our study. However, they may also reflect individual variability in  
5 response to the risk environment and presence of genetic factors (such as the  
6 *COMT* haplotype containing Met158) that may relate to resilience, adaptive  
7 changes in regulation of emotion reactivity and successful coping with stress.[38]  
8  
9 The observed risk also seemed to arise from an aggregation of the  
10 environmental indicators, as none of the risk items separately gave evidence of  
11 GxE with the risk variants from *COMT* or *DRD3* (data not shown). This could  
12 reflect a cumulative nature of these environmental influences, such that the effect  
13 of one marker may be weak, but the accumulated effect of multiple markers,  
14 together with genetic susceptibility, would be strong enough to increase the risk  
15 for a deviant development of emotional regulation and thus depressiveness.[39]  
16  
17 There is some prior evidence of interaction of *COMT* with a risk environment on  
18 psychosis, antisocial behaviour and dissociation. A study on children with ADHD  
19 showed a gene-environment interaction between the Val/Val genotype and low  
20 birth weight on early-onset antisocial behaviour,[40] and the Val158 allele was  
21 also found to associate with cannabis use and psychotic symptoms[41] and with  
22 increasing levels of dissociation in those exposed to higher levels of childhood  
23 trauma.[42] Interestingly, a recent report[43] revealed an impact of that  
24 polymorphism on gender-related patterns of regulation of emotions (activation in  
25 limbic and paralimbic regions) in line with findings of the present study.  
26  
27  
28  
29  
30  
31  
32  
33  
34  
35  
36  
37  
38  
39  
40  
41  
42  
43  
44  
45  
46  
47  
48  
49  
50  
51  
52  
53  
54  
55  
56  
57  
58  
59  
60

Deleted: major

Another main finding of the present study, and statistically the strongest one, was observed in the dopamine receptor D2 gene *DRD2*, where a haplotype comprising the intronic variants rs4648318 in LD block 2 and rs4274224 in block 3 was found to associate with depressive symptoms particularly in males, regardless of their early environment ( $P=0.00005$ ). Dopamine receptors have key roles in a variety of processes in the vertebrate central nervous system, and dysfunction in dopaminergic neurotransmission may therefore predispose to a variety of neuropsychiatric disorders. Among the receptor genes, *DRD2* has attracted the most attention and has been implied to have a role in the etiology of several psychiatric disorders. However, there are only a few previous reports on unipolar depression, including positive,[44] nominal[45] and negative[46, 47] findings, and for results on depression conditional on risk environment.[44, 46, 48]

Our varying results for males and females in general imply different mechanisms of mood regulation and possible gender-specific responses to environmental effectors. Gender differences in depression[2, 49] as well as in temperament traits[49] have previously been reported in various populations, including the current one,[50] and the prevalence of depression is higher in women.[51] A true gender-specific effect of genetic variants on depressiveness would not be surprising, as there is evidence of gender differences in dopaminergic function[52] that may be estrogen-dependent.

1  
2  
3  
4  
5  
6  
7  
8  
9  
10  
11  
12  
13  
14  
15  
16  
17  
18  
19  
20  
21  
22  
23  
24  
25  
26  
27  
28  
29  
30  
31  
32  
33  
34  
35  
36  
37  
38  
39  
40  
41  
42  
43  
44  
45  
46  
47  
48  
49  
50  
51  
52  
53  
54  
55  
56  
57  
58  
59  
60

It is noteworthy that despite previous reports of the 5-HTTLPR variant,[13] we did not detect association evidence for *SLC6A4*. Similarly, a recent meta-analysis did not find any evidence of an association with depression alone, or in interaction with stressful life-events,[16] although a current review[14] and a meta-analysis of all studies to date[15] support the positive association findings and the role of 5-HTTLPR and stress in depression. The *SLC6A4* SNPs included in our study tag the 5-HTTLPR well ( $D' > 0.9$ ), as determined by using genotypes from a population-based Finnish Health 2000 study.[53] Moreover, the LD measure thus obtained is conservative, since in the population under current study LD has been shown to be stronger than in the general Finnish population, which was represented by the Health 2000 study sample.[54]

We did not use the Bonferroni correction for multiple testing due to limitations of sample size and expected magnitude of gene effects in complex traits. Although none of the results from the primary analyses (Table 2) survive conservative correction, a neurobiological a priori hypothesis based on previously published studies supports the validity of our most robust findings. It is, however, noteworthy that they were observed only when the sample was conditioned on [measures of early development or of social environment](#), or gender. Still, the strongest association signal, obtained using *DRD2*'s rs4274224 with HSCL score in males ( $P=0.0006$ ), remains close to statistical significance even when taking into account the amount of multiple testing performed. The finding was further supported by results of our haplotype analysis containing rs4274224, which

Deleted: at risk

1  
2 showed a statistically significant association with the HSCL score in males  
3  
4 (P=0.00005).  
5  
6  
7

8  
9 There are some limitations in the present study. First, it is notable that  
10 depression as defined here did not necessarily signify a clinical diagnosis of  
11 major depression. Instead it was defined either based on self-report or on the  
12 score from HSCL, which as a measure has its limitations. However, the  
13 prevalence of depressed mood was in the same range as in earlier reports.[1, 55]  
14  
15 Secondly, there was a notable drop-out rate among the original material of all  
16 cohort members. About half of the original cohort members did not participate in  
17 this study. Finally, when the NFBC 1966 study was initiated it was not possible to  
18 predict that an investigation such as the present one would one day be  
19 conducted. Therefore, we are limited by the original choice of variables to be  
20 collected, and the [measures of early development or of social environment](#), may  
21 only be indicators or markers of risk rather than risk factors themselves.[39] It is  
22 also noteworthy that we did not detect any association [of our measure of current](#)  
23 depression [with the measure of high early developmental risk](#), despite it being  
24 formulated based on previous reports of their effects on psychiatric health and  
25 wellbeing.[27-30]. However, the effect of genetic risk may be modulated by early  
26 life stress even though the direct link between early life environment and current  
27 status would be too weak to be detected in our study sample, and this  
28 modulating effect may be seen in the results of the GxE analysis.  
29  
30  
31  
32  
33  
34  
35  
36  
37  
38  
39  
40  
41  
42  
43  
44  
45  
46  
47  
48  
49  
50  
51  
52  
53  
54  
55  
56  
57  
58  
59  
60

Deleted: environmental risk factors

Deleted: with

Deleted: and

Deleted: environment

1  
2 The current study has several potential advantages, such as the availability of  
3 longitudinal follow-up data starting antenatally, enabling us to include the  
4 environmental dimension without any risk of recall bias. Another advantage is the  
5 unique genetic structure of our study cohort, characterized by isolation, founder  
6 effect, multiple bottlenecks and more genetic homogeneity compared to many  
7 other isolates,[56] allowing us to identify genetic risk loci that may be missed in  
8 the screening of other more heterogeneous populations. Furthermore, the  
9 subjects were representative, with all cohort members born in the same year and  
10 within a geographically defined area.  
11  
12  
13  
14  
15  
16  
17  
18  
19

20  
21  
22 In addition, the size of the sample is sufficient to identify genetic variants of  
23 moderate impact. We also have both genders represented in almost equal  
24 amounts (48% males, 52% females), which is notable since gender differences  
25 are evident both in depression[2, 49] and in temperament traits, for example  
26 Harm avoidance.[49] ~~Furthermore, it is beneficial that the sample is a one-year~~  
27 birth cohort, as it is well established that some psychiatric traits, such as Harm  
28 avoidance[57] of temperament, are age-dependent. We can therefore isolate  
29 genetic effects from the effects of aging.  
30  
31  
32  
33  
34  
35  
36  
37  
38  
39

Deleted: I

Deleted: also

Deleted: Furthermore, we provide a complete coverage of the major candidate genes that are relevant with the present focus.

Deleted: the

40  
41 Our results support a modest role of *COMT* and *DRD2*, two genes of monoamine  
42 neurotransmission, in the etiology of depression conditional on environmental  
43 risk particularly in males, though not direct effects of monoaminergic genes in  
44 this unselected population. These findings imply that the nature of the role of  
45  
46  
47  
48  
49  
50  
51  
52  
53  
54  
55  
56  
57  
58  
59  
60

1  
2 monoaminergic genes in depression should be examined further in future  
3  
4 studies, and are pending replication in other, independent population samples.  
5  
6  
7  
8  
9

## 10 **ACKNOWLEDGEMENTS, COMPETING INTERESTS, FUNDING**

11  
12  
13  
14 This study was funded by the Academy of Finland's CoE in Complex Disease  
15 Genetics; the Biocentrum Helsinki Foundation; the Academy of Finland's grant to  
16 the NFBC Studies, to Dr. Tiina Paunio, Post-doctoral Fellowship to Dr. Anu  
17 Loukola and Academy Researcher Fellowship to Dr. Jouko Miettunen; the  
18 University of Helsinki Research Foundation grant for young researchers to Emma  
19 Nyman; and the Signe and Ane Gyllenberg Foundation grant to Dr. Pirjo Mäki.  
20  
21 There are no significant competing financial, professional or personal interests  
22 that could have influenced the performance or presentation of the current study.  
23  
24  
25  
26  
27  
28  
29  
30  
31  
32  
33  
34

## 35 **CONTRIBUTORS**

36  
37  
38 Tiina Paunio, Emma Nyman, Sonja Sulkava, Jouko Miettunen, Matti Joukamaa  
39 and Juha Veijola designed the study and wrote the protocol, with help also from  
40 Nelson Freimer, Pirjo Mäki, Leena Peltonen and Marjo-Riitta Järvelin. Emma  
41 Nyman and to some extent Tiina Paunio also managed the literature searches.  
42  
43  
44  
45  
46  
47 Sonja Sulkava and Emma Nyman undertook the statistical analyses. Emma  
48  
49  
50  
51  
52  
53  
54  
55  
56  
57  
58  
59  
60

1  
2  
3  
4  
5  
6  
7  
8  
9  
10  
11  
12  
13  
14  
15  
16  
17  
18  
19  
20  
21  
22  
23  
24  
25  
26  
27  
28  
29  
30  
31  
32  
33  
34  
35  
36  
37  
38  
39  
40  
41  
42  
43  
44  
45  
46  
47  
48  
49  
50  
51  
52  
53  
54  
55  
56  
57  
58  
59  
60

Nyman and Tiina Paunio wrote the first draft of the manuscript, and other authors contributed to its later versions. All authors contributed to and have approved the final manuscript.

**COPYRIGHT LICENCE STATEMENT**

The Corresponding Author has the right to grant on behalf of all authors and does grant on behalf of all authors, an exclusive licence to the BMJ Publishing Group Ltd to permit this article (if accepted) to be published in BMJ Open.

For peer review only



## REFERENCES

- 1 Kessler RC, Berglund P, Demler O, Jin R, Koretz D, Merikangas KR, Rush AJ, Walters EE, Wang PS. The epidemiology of major depressive disorder: results from the National Comorbidity Survey Replication (NCS-R). *Jama*. 2003;289:3095-105.
- 2 Kendler KS, Gatz M, Gardner CO, Pedersen NL. A Swedish national twin study of lifetime major depression. *Am J Psychiatry*. 2006;163:109-14.
- 3 Bosker FJ, Hartman CA, Nolte IM, Prins BP, Terpstra P, Posthuma D, van Veen T, Willemsen G, Derijk RH, de Geus EJ, Hoogendijk WJ, Sullivan PF, Penninx BW, Boomsma DI, Snieder H, Nolen WA. Poor replication of candidate genes for major depressive disorder using genome-wide association data. *Mol Psychiatry*.
- 4 Melartin TK, Rytasala HJ, Leskela US, Lestela-Mielonen PS, Sokero TP, Isometsa ET. Current comorbidity of psychiatric disorders among DSM-IV major depressive disorder patients in psychiatric care in the Vantaa Depression Study. *J Clin Psychiatry*. 2002;63:126-34.
- 5 Jylha P, Isometsa E. The relationship of neuroticism and extraversion to symptoms of anxiety and depression in the general population. *Depress Anxiety*. 2006;23:281-9.
- 6 Jylha P, Isometsa E. Temperament, character and symptoms of anxiety and depression in the general population. *Eur Psychiatry*. 2006;21:389-95.
- 7 Cloninger CR, Svrakic DM, Przybeck TR. Can personality assessment predict future depression? A twelve-month follow-up of 631 subjects. *J Affect Disord*. 2006;92:35-44.
- 8 Ansorge MS, Hen R, Gingrich JA. Neurodevelopmental origins of depressive disorders. *Curr Opin Pharmacol*. 2007;7:8-17.
- 9 Caspi A, Moffitt TE. Gene-environment interactions in psychiatry: joining forces with neuroscience. *Nat Rev Neurosci*. 2006;7:583-90.
- 10 Cerda M, Sagdeo A, Johnson J, Galea S. Genetic and environmental influences on psychiatric comorbidity: a systematic review. *J Affect Disord*. 126:14-38.
- 11 Schildkraut JJ. The catecholamine hypothesis of affective disorders: a review of supporting evidence. *Am J Psychiatry*. 1965;122:509-22.
- 12 Meyer-Lindenberg A. Neural connectivity as an intermediate phenotype: brain networks under genetic control. *Hum Brain Mapp*. 2009;30:1938-46.
- 13 Caspi A, Sugden K, Moffitt TE, Taylor A, Craig IW, Harrington H, McClay J, Mill J, Martin J, Braithwaite A, Poulton R. Influence of life stress on depression: moderation by a polymorphism in the 5-HTT gene. *Science*. 2003;301:386-9.
- 14 Uher R, McGuffin P. The moderation by the serotonin transporter gene of environmental adversity in the etiology of depression: 2009 update. *Mol Psychiatry*. 15:18-22.
- 15 Karg K, Burmeister M, Shedden K, Sen S. The Serotonin Transporter Promoter Variant (5-HTTLPR), Stress, and Depression Meta-analysis Revisited: Evidence of Genetic Moderation. *Arch Gen Psychiatry*.

- 1  
2  
3 16 Risch N, Herrell R, Lehner T, Liang KY, Eaves L, Hoh J, Griem A, Kovacs M,  
4 Ott J, Merikangas KR. Interaction between the serotonin transporter gene (5-HTTLPR),  
5 stressful life events, and risk of depression: a meta-analysis. *Jama*. 2009;301:2462-71.  
6 17 Opmeer EM, Korteekaas R, Aleman A. Depression and the role of genes involved  
7 in dopamine metabolism and signalling. *Prog Neurobiol*. 92:112-33.  
8 18 Waider J, Araragi N, Gutknecht L, Lesch KP. Tryptophan hydroxylase-2 (TPH2)  
9 in disorders of cognitive control and emotion regulation: a perspective.  
10 *Psychoneuroendocrinology*. 36:393-405.  
11 19 Hayden EP, Klein DN, Dougherty LR, Olino TM, Lipton RS, Dyson MW,  
12 Bufferd SJ, Durbin CE, Sheikh HI, Singh SM. The dopamine D2 receptor gene and  
13 depressive and anxious symptoms in childhood: associations and evidence for gene-  
14 environment correlation and gene-environment interaction. *Psychiatr Genet*. 20:304-10.  
15 20 Levitan RD, Masellis M, Lam RW, Kaplan AS, Davis C, Tharmalingam S,  
16 Mackenzie B, Basile VS, Kennedy JL. A birth-season/DRD4 gene interaction predicts  
17 weight gain and obesity in women with seasonal affective disorder: A seasonal thrifty  
18 phenotype hypothesis. *Neuropsychopharmacology*. 2006;31:2498-503.  
19 21 Rantakallio P. Groups at risk in low birth weight infants and perinatal mortality.  
20 *Acta Paediatr Scand*. 1969;193:Suppl 193:1+.  
21 22 Haapea M, Miettunen J, Laara E, Joukamaa MI, Jarvelin MR, Isohanni MK,  
22 Veijola JM. Non-participation in a field survey with respect to psychiatric disorders.  
23 *Scand J Public Health*. 2008;36:728-36.  
24 23 Veijola J, Jokelainen J, Laksy K, Kantojarvi L, Kokkonen P, Jarvelin MR,  
25 Joukamaa M. The Hopkins Symptom Checklist-25 in screening DSM-III-R axis-I  
26 disorders. *Nord J Psychiatry*. 2003;57:119-23.  
27 24 Miettunen J, Kantojarvi L, Ekelund J, Veijola J, Karvonen JT, Peltonen L,  
28 Jarvelin MR, Freimer N, Lichtermann D, Joukamaa M. A large population cohort  
29 provides normative data for investigation of temperament. *Acta Psychiatr Scand*.  
30 2004;110:150-7.  
31 25 Cloninger CR, Svrakic DM, Przybeck TR. A psychobiological model of  
32 temperament and character. *Arch Gen Psychiatry*. 1993;50:975-90.  
33 26 Winokur A, Winokur DF, Rickels K, Cox DS. Symptoms of emotional distress in  
34 a family planning service: stability over a four-week period. *Br J Psychiatry*.  
35 1984;144:395-9.  
36 27 Barker DJ, Osmond C, Forsen TJ, Kajantie E, Eriksson JG. Trajectories of growth  
37 among children who have coronary events as adults. *N Engl J Med*. 2005;353:1802-9.  
38 28 Isohanni M, Jones PB, Moilanen K, Rantakallio P, Veijola J, Oja H, Koironen M,  
39 Jokelainen J, Croudace T, Jarvelin M. Early developmental milestones in adult  
40 schizophrenia and other psychoses. A 31-year follow-up of the Northern Finland 1966  
41 Birth Cohort. *Schizophr Res*. 2001;52:1-19.  
42 29 Myhrman A, Rantakallio P, Isohanni M, Jones P, Partanen U. Unwantedness of a  
43 pregnancy and schizophrenia in the child. *Br J Psychiatry*. 1996;169:637-40.  
44 30 Goodman E, Huang B. Socioeconomic status, depressive symptoms, and  
45 adolescent substance use. *Arch Pediatr Adolesc Med*. 2002;156:448-53.  
46 31 Lachman HM, Papolos DF, Saito T, Yu YM, Szumlanski CL, Weinshilboum RM.  
47 Human catechol-O-methyltransferase pharmacogenetics: description of a functional  
48  
49  
50  
51  
52  
53  
54  
55  
56  
57  
58  
59  
60

- 1  
2 polymorphism and its potential application to neuropsychiatric disorders.  
3 Pharmacogenetics. 1996;6:243-50.
- 4 32 Tsai SJ, Gau YT, Hong CJ, Liou YJ, Yu YW, Chen TJ. Sexually dimorphic effect  
5 of catechol-O-methyltransferase val158met polymorphism on clinical response to  
6 fluoxetine in major depressive patients. *J Affect Disord*. 2009;113:183-7.
- 7 33 Baune BT, Hohoff C, Berger K, Neumann A, Mortensen S, Roehrs T, Deckert J,  
8 Arolt V, Domschke K. Association of the COMT val158met variant with antidepressant  
9 treatment response in major depression. *Neuropsychopharmacology*. 2008;33:924-32.
- 10 34 Massat I, Souery D, Del-Favero J, Nothen M, Blackwood D, Muir W, Kaneva R,  
11 Serretti A, Lorenzi C, Rietschel M, Milanova V, Papadimitriou GN, Dikeos D, Van  
12 Broekhoven C, Mendlewicz J. Association between COMT (Val158Met) functional  
13 polymorphism and early onset in patients with major depressive disorder in a European  
14 multicenter genetic association study. *Mol Psychiatry*. 2005;10:598-605.
- 15 35 Bruder GE, Keilp JG, Xu H, Shikhman M, Schori E, Gorman JM, Gilliam TC.  
16 Catechol-O-methyltransferase (COMT) genotypes and working memory: associations  
17 with differing cognitive operations. *Biol Psychiatry*. 2005;58:901-7.
- 18 36 Egan MF, Goldberg TE, Kolachana BS, Callicott JH, Mazzanti CM, Straub RE,  
19 Goldman D, Weinberger DR. Effect of COMT Val108/158 Met genotype on frontal lobe  
20 function and risk for schizophrenia. *Proc Natl Acad Sci U S A*. 2001;98:6917-22.
- 21 37 Munafò MR, Bowes L, Clark TG, Flint J. Lack of association of the COMT  
22 (Val158/108 Met) gene and schizophrenia: a meta-analysis of case-control studies. *Mol*  
23 *Psychiatry*. 2005;10:765-70.
- 24 38 Feder A, Nestler EJ, Charney DS. Psychobiology and molecular genetics of  
25 resilience. *Nat Rev Neurosci*. 2009;10:446-57.
- 26 39 Moffitt TE, Caspi A, Rutter M. Strategy for investigating interactions between  
27 measured genes and measured environments. *Arch Gen Psychiatry*. 2005;62:473-81.
- 28 40 Thapar A, Langley K, Fowler T, Rice F, Turic D, Whittinger N, Aggleton J, Van  
29 den Bree M, Owen M, O'Donovan M. Catechol O-methyltransferase gene variant and  
30 birth weight predict early-onset antisocial behavior in children with attention-  
31 deficit/hyperactivity disorder. *Arch Gen Psychiatry*. 2005;62:1275-8.
- 32 41 Caspi A, Moffitt TE, Cannon M, McClay J, Murray R, Harrington H, Taylor A,  
33 Arseneault L, Williams B, Braithwaite A, Poulton R, Craig IW. Moderation of the effect  
34 of adolescent-onset cannabis use on adult psychosis by a functional polymorphism in the  
35 catechol-O-methyltransferase gene: longitudinal evidence of a gene X environment  
36 interaction. *Biol Psychiatry*. 2005;57:1117-27.
- 37 42 Savitz JB, van der Merwe L, Newman TK, Solms M, Stein DJ, Ramesar RS. The  
38 relationship between childhood abuse and dissociation. Is it influenced by catechol-O-  
39 methyltransferase (COMT) activity? *Int J Neuropsychopharmacol*. 2008;11:149-61.
- 40 43 Kempton MJ, Haldane M, Jogia J, Christodoulou T, Powell J, Collier D, Williams  
41 SC, Frangou S. The effects of gender and COMT Val158Met polymorphism on fearful  
42 facial affect recognition: a fMRI study. *Int J Neuropsychopharmacol*. 2009;12:371-81.
- 43 44 Guo G, Tillman KH. Trajectories of depressive symptoms, dopamine D2 and D4  
44 receptors, family socioeconomic status and social support in adolescence and young  
45 adulthood. *Psychiatr Genet*. 2009;19:14-26.
- 46 45 Koks S, Nikopoulou T, Koido K, Maron E, Altmae S, Heinaste E, Vabrit K,  
47 Tammekivi V, Hallast P, Kurg A, Shlik J, Vasar V, Metspalu A, Vasar E. Analysis of  
48  
49  
50  
51  
52  
53  
54  
55  
56  
57  
58  
59  
60

- 1  
2 SNP profiles in patients with major depressive disorder. *Int J Neuropsychopharmacol*.  
3 2006;9:167-74.  
4  
5 46 Vaske J, Makarios M, Boisvert D, Beaver KM, Wright JP. The interaction of  
6 DRD2 and violent victimization on depression: an analysis by gender and race. *J Affect*  
7 *Disord*. 2009;112:120-5.  
8 47 Furlong RA, Coleman TA, Ho L, Rubinsztein JS, Walsh C, Paykel ES,  
9 Rubinsztein DC. No association of a functional polymorphism in the dopamine D2  
10 receptor promoter region with bipolar or unipolar affective disorders. *Am J Med Genet*.  
11 1998;81:385-7.  
12 48 Elovainio M, Jokela M, Kivimaki M, Pulkki-Raback L, Lehtimaki T, Airla N,  
13 Keltikangas-Jarvinen L. Genetic variants in the DRD2 gene moderate the relationship  
14 between stressful life events and depressive symptoms in adults: cardiovascular risk in  
15 young Finns study. *Psychosom Med*. 2007;69:391-5.  
16 49 Miettunen J, Veijola J, Lauronen E, Kantojarvi L, Joukamaa M. Sex differences  
17 in Cloninger's temperament dimensions--a meta-analysis. *Compr Psychiatry*.  
18 2007;48:161-9.  
19 50 Herva A, Laitinen J, Miettunen J, Veijola J, Karvonen JT, Laksy K, Joukamaa M.  
20 Obesity and depression: results from the longitudinal Northern Finland 1966 Birth Cohort  
21 Study. *Int J Obes (Lond)*. 2006;30:520-7.  
22 51 Kuehner C. Gender differences in unipolar depression: an update of  
23 epidemiological findings and possible explanations. *Acta Psychiatr Scand*. 2003;108:163-  
24 74.  
25 52 Andersen SL, Teicher MH. Sex differences in dopamine receptors and their  
26 relevance to ADHD. *Neurosci Biobehav Rev*. 2000;24:137-41.  
27 53 Utge S, Soronen P, Partonen T, Loukola A, Kronholm E, Pirkola S, Nyman E,  
28 Porkka-Heiskanen T, Paunio T. A population-based association study of candidate genes  
29 for depression and sleep disturbance. *Am J Med Genet B Neuropsychiatr Genet*. 2009.  
30 54 Jakkula E, Rehnstrom K, Varilo T, Pietilainen OP, Paunio T, Pedersen NL,  
31 deFaire U, Jarvelin MR, Saharinen J, Freimer N, Ripatti S, Purcell S, Collins A, Daly MJ,  
32 Palotie A, Peltonen L. The genome-wide patterns of variation expose significant  
33 substructure in a founder population. *Am J Hum Genet*. 2008;83:787-94.  
34 55 Suvisaari J, Aalto-Setälä T, Tuulio-Henriksson A, Harkanen T, Saarni SI, Perala  
35 J, Schreck M, Castaneda A, Hintikka J, Kestila L, Lahtenmaki S, Latvala A, Koskinen  
36 S, Marttunen M, Aro H, Lonnqvist J. Mental disorders in young adulthood. *Psychol Med*.  
37 2009;39:287-99.  
38 56 Service S, DeYoung J, Karayiorgou M, Roos JL, Pretorius H, Bedoya G, Ospina  
39 J, Ruiz-Linares A, Macedo A, Palha JA, Heutink P, Aulchenko Y, Oostra B, van Duijn C,  
40 Jarvelin MR, Varilo T, Peddle L, Rahman P, Piras G, Monne M, Murray S, Galver L,  
41 Peltonen L, Sabatti C, Collins A, Freimer N. Magnitude and distribution of linkage  
42 disequilibrium in population isolates and implications for genome-wide association  
43 studies. *Nat Genet*. 2006;38:556-60.  
44 57 Brandstrom S, Schlette P, Przybeck TR, Lundberg M, Forsgren T, Sigvardsson S,  
45 Nylander PO, Nilsson LG, Cloninger RC, Adolfsson R. Swedish normative data on  
46 personality using the Temperament and Character Inventory. *Compr Psychiatry*.  
47 1998;39:122-8.  
48  
49  
50  
51  
52  
53  
54  
55  
56  
57  
58  
59  
60

1  
2  
3  
4  
5  
6  
7  
8  
9  
10  
11  
12  
13  
14  
15  
16  
17  
18  
19  
20  
21  
22  
23  
24  
25  
26  
27  
28  
29  
30  
31  
32  
33  
34  
35  
36  
37  
38  
39  
40  
41  
42  
43  
44  
45  
46  
47  
48  
49  
50  
51  
52  
53  
54  
55  
56  
57  
58  
59  
60

For peer review only

STROBE 2007 (v4) Statement—Checklist of items that should be included in reports of cohort studies

| Section/Topic             | Item # | Recommendation                                                                                                                                                                       | Reported on page # |
|---------------------------|--------|--------------------------------------------------------------------------------------------------------------------------------------------------------------------------------------|--------------------|
| Title and abstract        | 1      | (a) Indicate the study’s design with a commonly used term in the title or the abstract                                                                                               | 1                  |
|                           |        | (b) Provide in the abstract an informative and balanced summary of what was done and what was found                                                                                  | 3-4                |
| <b>Introduction</b>       |        |                                                                                                                                                                                      |                    |
| Background/rationale      | 2      | Explain the scientific background and rationale for the investigation being reported                                                                                                 | 6-7                |
| Objectives                | 3      | State specific objectives, including any prespecified hypotheses                                                                                                                     | 7-8                |
| <b>Methods</b>            |        |                                                                                                                                                                                      |                    |
| Study design              | 4      | Present key elements of study design early in the paper                                                                                                                              | 8                  |
| Setting                   | 5      | Describe the setting, locations, and relevant dates, including periods of recruitment, exposure, follow-up, and data collection                                                      | 8-11               |
| Participants              | 6      | (a) Give the eligibility criteria, and the sources and methods of selection of participants. Describe methods of follow-up                                                           | 8-11               |
|                           |        | (b) For matched studies, give matching criteria and number of exposed and unexposed                                                                                                  |                    |
| Variables                 | 7      | Clearly define all outcomes, exposures, predictors, potential confounders, and effect modifiers. Give diagnostic criteria, if applicable                                             | 8-11               |
| Data sources/ measurement | 8*     | For each variable of interest, give sources of data and details of methods of assessment (measurement). Describe comparability of assessment methods if there is more than one group | 8-11               |
| Bias                      | 9      | Describe any efforts to address potential sources of bias                                                                                                                            | 8-11               |
| Study size                | 10     | Explain how the study size was arrived at                                                                                                                                            | 8-11               |
| Quantitative variables    | 11     | Explain how quantitative variables were handled in the analyses. If applicable, describe which groupings were chosen and why                                                         | 12-13              |
| Statistical methods       | 12     | (a) Describe all statistical methods, including those used to control for confounding                                                                                                | 12-13              |
|                           |        | (b) Describe any methods used to examine subgroups and interactions                                                                                                                  | 12-13              |
|                           |        | (c) Explain how missing data were addressed                                                                                                                                          |                    |
|                           |        | (d) If applicable, explain how loss to follow-up was addressed                                                                                                                       |                    |
|                           |        | (e) Describe any sensitivity analyses                                                                                                                                                |                    |
| <b>Results</b>            |        |                                                                                                                                                                                      |                    |

|                          |     |                                                                                                                                                                                                              |           |
|--------------------------|-----|--------------------------------------------------------------------------------------------------------------------------------------------------------------------------------------------------------------|-----------|
| Participants             | 13* | (a) Report numbers of individuals at each stage of study—eg numbers potentially eligible, examined for eligibility, confirmed eligible, included in the study, completing follow-up, and analysed            | 8-11      |
|                          |     | (b) Give reasons for non-participation at each stage                                                                                                                                                         | 8-11      |
|                          |     | (c) Consider use of a flow diagram                                                                                                                                                                           |           |
| Descriptive data         | 14* | (a) Give characteristics of study participants (eg demographic, clinical, social) and information on exposures and potential confounders                                                                     | 8-11      |
|                          |     | (b) Indicate number of participants with missing data for each variable of interest                                                                                                                          | 8-11      |
|                          |     | (c) Summarise follow-up time (eg, average and total amount)                                                                                                                                                  | 8-11      |
| Outcome data             | 15* | Report numbers of outcome events or summary measures over time                                                                                                                                               | 8-13      |
| Main results             | 16  | (a) Give unadjusted estimates and, if applicable, confounder-adjusted estimates and their precision (eg, 95% confidence interval). Make clear which confounders were adjusted for and why they were included | 13-18     |
|                          |     | (b) Report category boundaries when continuous variables were categorized                                                                                                                                    |           |
|                          |     | (c) If relevant, consider translating estimates of relative risk into absolute risk for a meaningful time period                                                                                             |           |
| Other analyses           | 17  | Report other analyses done—eg analyses of subgroups and interactions, and sensitivity analyses                                                                                                               | 13-18     |
| <b>Discussion</b>        |     |                                                                                                                                                                                                              |           |
| Key results              | 18  | Summarise key results with reference to study objectives                                                                                                                                                     | 18-22, 24 |
| <b>Limitations</b>       |     |                                                                                                                                                                                                              |           |
| Interpretation           | 20  | Give a cautious overall interpretation of results considering objectives, limitations, multiplicity of analyses, results from similar studies, and other relevant evidence                                   | 22-24     |
| Generalisability         | 21  | Discuss the generalisability (external validity) of the study results                                                                                                                                        | 24        |
| <b>Other information</b> |     |                                                                                                                                                                                                              |           |
| Funding                  | 22  | Give the source of funding and the role of the funders for the present study and, if applicable, for the original study on which the present article is based                                                | 24-25     |

\*Give information separately for cases and controls in case-control studies and, if applicable, for exposed and unexposed groups in cohort and cross-sectional studies.

**Note:** An Explanation and Elaboration article discusses each checklist item and gives methodological background and published examples of transparent reporting. The STROBE checklist is best used in conjunction with this article (freely available on the Web sites of PLoS Medicine at <http://www.plosmedicine.org/>, Annals of Internal Medicine at <http://www.annals.org/>, and Epidemiology at <http://www.epidem.com/>). Information on the STROBE Initiative is available at [www.strobe-statement.org](http://www.strobe-statement.org).
